# Supplementary material for: Critical care admission following elective surgery was not associated with survival benefit: prospective analysis of data from 27 countries
Source: Springer Nature journal article supplement (doi:10.1007/s00134-016-4633-8), 2017-04-24
Supplement: MOESM1 [file 134_2016_4633_MOESM1_ESM.docx]

**Membership of the International Surgical Outcomes Study (ISOS) group**

| **First Name** | **Middle Name** | **Last Name** | **City** | | **Affiliation** | | **Country** | | **Role** |
| --- | --- | --- | --- | --- | --- | --- | --- | --- | --- |
| Rupert | M. | Pearse | London | | Queen Mary University of London | | United Kingdom | | Steering committee - chief investigator |
| Scott |  | Beattie | Toronto | | Toronto General Hospital | | Canada | | Steering committee |
| Pierre-Alain |  | Clavien | Zurich | | Zurich University Hospital | | Switzerland | | Steering committee |
| Nicolas |  | Demartines | Lausanne | | University Hospital of Lausanne | | Switzerland | | Steering committee |
| Lee | A. | Fleisher | Philadelphia | | University of Pennsylvania Perelman School of Medicine | | United States of America | | Steering committee |
| Mike |  | Grocott | Southampton | | University Hospital Southampton | | United Kingdom | | Steering committee - independent, chair |
| James |  | Haddow | Scarborough | | Foundation for Blood Research | | United States of America | | Steering committee |
| Andreas |  | Hoeft | Bonn | | University Hospital Bonn | | Germany | | Steering committee |
| Peter |  | Holt | London | | St George's Vascular Institute | | United Kingdom | | Steering committee |
| Rui |  | Moreno | Lisbon | | Centro Hospitalar de Lisboa Central | | Portugal | | Steering committee |
| Naomi |  | Pritchard | Cambridge | | University of Cambridge School of Clinical Medicine | | United Kingdom | | Steering committee - independent, patient representative |
| Andrew |  | Rhodes | London | | St George's University of London | | United Kingdom | | Steering committee |
| Duminda |  | Wijeysundera | Toronto | | Toronto General Hospital | | Canada | | Steering committee |
| Matt |  | Wilson | Washington | | Washington Hospital Center | | United States of America | | Steering committee – independent |
| Tahania |  | Ahmed | London | | Queen Mary University of London | | United Kingdom | | Study management group - statistician |
| Kirsty |  | Everingham | London | | Royal London Hospital | | United Kingdom | | Study management group |
| Russell |  | Hewson | London | | Royal London Hospital | | United Kingdom | | Study management group - study websites and information governance |
| Marta |  | Januszewska | London | | Royal London Hospital | | United Kingdom | | Study management group - study coordinator |
| Rupert | M. | Pearse | London | | Queen Mary University of London | | United Kingdom | | Study management group - chief Investigator |
| Mandeep-Kaur |  | Phull | London | | Royal London Hospital | | United Kingdom | | Study management group |
| Richard |  | Halliwell | Westmead | | Westmead Hospital | | Australia | | National Co-ordinator |
| Mark |  | Shulman | Melbourne | | Alfred Hospital | | Australia | | National Co-ordinator |
| Paul |  | Myles | Melbourne | | Alfred Hospital | | Australia | | National Co-ordinator |
| Werner |  | Schmid | Vienna | | Medical University of Vienna | | Austria | | National Co-ordinator |
| Michael |  | Hiesmayr | Vienna | | Medical University of Vienna | | Austria | | National Co-ordinator |
| Patrick |  | Wouters | Ghent | | University Hospitals Ghent | | Belgium | | National Co-ordinator |
| Stefan |  | de Hert | Ghent | | University Hospitals Ghent | | Belgium | | National Co-ordinator |
| Suzana |  | Lobo | São José do Rio Preto | | Faculdade de Medicina de São José do Rio Preto | | Brazil | | National Co-ordinator |
| Scott |  | Beattie | Toronto | | Toronto General Hospital | | Canada | | National Co-ordinator |
| Duminda |  | Wijeysundera | Toronto | | Toronto General Hospital | | Canada | | National Co-ordinator |
| Xiangming |  | Fang | Nanjing | | Nanjing Medical University | | China | | National Co-ordinator |
| Lars |  | Rasmussen | København | | Rigshospitalet, HOC | | Denmark | | National Co-ordinator |
| Emmanuel |  | Futier | Clermont-Ferrand | | University Hospital of Clermont-Ferrand | | France | | National Co-ordinator |
| Matthieu |  | Biais | Bordeaux | | Centre Hospitalier Universitaire de Bordeaux | | France | | National Co-ordinator |
| Aurélien |  | Venara | Angers | | University Hospital of Angers | | France | | National Co-ordinator |
| Karem |  | Slim | Clermont-Ferrand | | University Hospital of Clermont-Ferrand | | France | | National Co-ordinator |
| Michael |  | Sander | Giessen | | Justus Liebig University | | Germany | | National Co-ordinator |
| Despoina |  | Koulenti | Athens | | Attikon University Hospital | | Greece | | National Co-ordinator |
| Kostoula |  | Arvaniti | Thessaloniki | | Papageorgiou General Hospital | | Greece | | National Co-ordinator |
| Mathew |  | Chan | Hong Kong | | The Chinese University of Hong Kong | | Hong Kong | | National Co-ordinator |
| Atul |  | Kulkarni | Mumbai | | Tata Memorial Hospital | | India | | National Co-ordinator |
| Susilo |  | Chandra | Jakarta | | University of Indonesia | | Indonesia | | National Co-ordinator |
| Aida |  | Tantri | Jakarta | | University of Indonesia | | Indonesia | | National Co-ordinator |
| Emad |  | Geddoa | Northwood | | Mount Vernon Hospital | | Iraq | | National Co-ordinator |
| Muntadhar |  | Abbas | Houston | | Texas A&M University | | Iraq | | National Co-ordinator |
| Giorgio |  | Della Rocca | Udine | | ASUI University of Udine | | Italy | | National Co-ordinator |
| Datin |  | Sivasakthi | Kuala Lumpur | | Hospital Kuala Lumpur | | Malaysia | | National Co-ordinator |
| Marzida |  | Mansor | Kuala Lumpur | | Hospital Kuala Lumpur | | Malaysia | | National Co-ordinator |
| Pastor |  | Luna | Mexico City | | University of Mexico City | | Mexico | | National Co-ordinator |
| Arthur |  | Bouwman | Eindhoven | | Catharina Hospital | | Netherlands | | National Co-ordinator |
| Wolfgang |  | Buhre | Maastricht | | Maastricht University Medical Center | | Netherlands | | National Co-ordinator |
| Vanessa |  | Beavis | Auckland | | Auckland City Hospital | | New Zealand | | National Co-ordinator |
| Douglas |  | Campbell | Auckland | | Auckland City Hospital | | New Zealand | | National Co-ordinator |
| Tim |  | Short | Auckland | | Auckland City Hospital | | New Zealand | | National Co-ordinator |
| Tunde |  | Osinaike | LAGOS | | LAGOS hospital | | Nigeria | | National Co-ordinator |
| Ricardo |  | Matos | Porto | | São João Hospital Center | | Portugal | | National Co-ordinator |
| Ioana |  | Grigoras | Iaşi | | Grigore T. Popa University of Medicine and Pharmacy | | Romania | | National Co-ordinator |
| Mikhail |  | Kirov | Arkhangelsk | | NORTHERN STATE MEDICAL UNIVERSITY | | Russia | | National Co-ordinator |
| Denis |  | Protsenko | Moscow | | Pirogov Russian National Research Medical University | | Russia | | National Co-ordinator |
| Bruce |  | Biccard | Durban | | University of KwaZulu-Natal | | South Africa | | National Co-ordinator |
| Cesar |  | Aldecoa | Valladolid | | Hospital Universitario "Rio Hortega" | | Spain | | National Co-ordinator |
| Michelle |  | Chew | Lund | | Lund University | | Sweden | | National Co-ordinator |
| Christoph |  | Hofer | Zurich | | Triemli City Hospital | | Switzerland | | National Co-ordinator |
| Martin |  | Hubner | Lausanne | | University Hospital of Lausanne | | Switzerland | | National Co-ordinator |
| James |  | Ditai | Mbale | | Mbale Regional Referral Hospital | | Uganda | | National Co-ordinator |
| Tamas |  | Szakmany | Cardiff | | Cardiff University | | United Kingdom | | National Co-ordinator |
| Lee |  | Fleisher | Philadelphia | | University of Pennsylvania | | United States of America | | National Co-ordinator |
| Marissa |  | Ferguson | Melbourne | | Alfred Hospital | | Australia | | Local investigator |
| Michael |  | MacMahon | Melbourne | | Alfred Hospital | | Australia | | Local investigator |
| Mark |  | Shulman | Melbourne | | Alfred Hospital | | Australia | | local co-ordinator |
| Ritchie |  | Cherian | Blacktown | | Blacktown Hospital | | Australia | | Local investigator |
| Helen |  | Currow | Blacktown | | Blacktown Hospital | | Australia | | local co-ordinator |
| Kathirgamanathan |  | Kanathiban | Blacktown | | Blacktown Hospital | | Australia | | Local investigator |
| David |  | Gillespie | Coffs Harbour | | Coffs Harbour Base Hospital | | Australia | | local co-ordinator |
| Edward |  | Pathmanathan | Coffs Harbour | | Coffs Harbour Base Hospital | | Australia | | Local investigator |
| Katherine |  | Phillips | Coffs Harbour | | Coffs Harbour Base Hospital | | Australia | | Local investigator |
| Jenifer |  | Reynolds | Coffs Harbour | | Coffs Harbour Base Hospital | | Australia | | local co-ordinator |
| Joanne |  | Rowley | Coffs Harbour | | Coffs Harbour Base Hospital | | Australia | | Local investigator |
| Jeanene |  | Douglas | New Lambton Heights | | John Hunter Hospital | | Australia | | Local investigator |
| Ross |  | Kerridge | New Lambton Heights | | John Hunter Hospital | | Australia | | local co-ordinator |
| Helen |  | Currow | Mount Druitt | | Mount Druitt Hospital | | Australia | | local co-ordinator |
| Sameer |  | Garg | Mount Druitt | | Mount Druitt Hospital | | Australia | | Local investigator |
| Michael |  | Bennett | Randwick | | Prince of Wales Hospital | | Australia | | local co-ordinator |
| Megha |  | Jain | Randwick | | Prince of Wales Hospital | | Australia | | Local investigator |
| David |  | Alcock | Hobart | | Royal Hobart Hospital | | Australia | | Local investigator |
| Nico |  | Terblanche | Hobart | | Royal Hobart Hospital | | Australia | | local co-ordinator |
| Rochelle |  | Cotter | Parkville | | Royal Melbourne Hospital | | Australia | | Local investigator |
| Kate |  | Leslie | Parkville | | Royal Melbourne Hospital | | Australia | | local co-ordinator |
| Marcelle |  | Stewart | Parkville | | Royal Melbourne Hospital | | Australia | | Local investigator |
| Nicolette |  | Zingerle | Parkville | | Royal Melbourne Hospital | | Australia | | Local investigator |
| Antony |  | Clyde | St Leonards | | Royal North Shore Hospital | | Australia | | Local investigator |
| Oliver |  | Hambidge | St Leonards | | Royal North Shore Hospital | | Australia | | Local investigator |
| Adam |  | Rehak | St Leonards | | Royal North Shore Hospital | | Australia | | local co-ordinator |
| Sharon |  | Cotterell | Camperdown | | Royal Prince Alfred Hospital | | Australia | | Local investigator |
| Wilson |  | Binh Quan Huynh | Camperdown | | Royal Prince Alfred Hospital | | Australia | | Local investigator |
| Timothy |  | McCulloch | Camperdown | | Royal Prince Alfred Hospital | | Australia | | local co-ordinator |
| Erez |  | Ben-Menachem | Darlinghurst | | St Vincent's Hospital | | Australia | | local co-ordinator |
| Thomas |  | Egan | Darlinghurst | | St Vincent's Hospital | | Australia | | Local investigator |
| Jennifer |  | Cope | Westmead | | Westmead Hospital | | Australia | | Local investigator |
| Richard |  | Halliwell | Westmead | | Westmead Hospital | | Australia | | local co-ordinator |
| Paul |  | Fellinger | Wien | | Allgemeines Krankenhaus Wien | | Austria | | Local investigator |
| Simone |  | Haselberger | Wien | | Allgemeines Krankenhaus Wien | | Austria | | Local investigator |
| Caroline |  | Holaubek | Wien | | Allgemeines Krankenhaus Wien | | Austria | | Local investigator |
| Paul |  | Lichtenegger | Wien | | Allgemeines Krankenhaus Wien | | Austria | | Local investigator |
| Florian |  | Scherz | Wien | | Allgemeines Krankenhaus Wien | | Austria | | Local investigator |
| Werner |  | Schmid | Wien | | Allgemeines Krankenhaus Wien | | Austria | | local co-ordinator |
| Franz |  | Hoffer | Gemeinde Hollabrunn | | Landesklinikum Hollabrunn | | Austria | | local co-ordinator |
| Veronika |  | Cakova | Horn | | Landesklinikum Horn | | Austria | | Local investigator |
| Andreas |  | Eichwalder | Horn | | Landesklinikum Horn | | Austria | | Local investigator |
| Norbert |  | Fischbach | Horn | | Landesklinikum Horn | | Austria | | Local investigator |
| Reinhold |  | Klug | Horn | | Landesklinikum Horn | | Austria | | local co-ordinator |
| Elisabeth |  | Schneider | Horn | | Landesklinikum Horn | | Austria | | Local investigator |
| Martin |  | Vesely | Horn | | Landesklinikum Horn | | Austria | | Local investigator |
| Reinhart |  | Wickenhauser | Horn | | Landesklinikum Horn | | Austria | | Local investigator |
| Karl Gernot |  | Grubmueller | Krems | | Landesklinikum Krems | | Austria | | Local investigator |
| Marion |  | Leitgeb | Krems | | Landesklinikum Krems | | Austria | | local co-ordinator |
| Friedrich |  | Lang | Neunkirchen | | Landesklinikum Neunkirchen | | Austria | | Local investigator |
| Nancy |  | Toro | Neunkirchen | | Landesklinikum Neunkirchen | | Austria | | local co-ordinator |
| Marlene |  | Bauer | Wiener Neustadt | | Landesklinikum Wiener Neustadt | | Austria | | Local investigator |
| Friedrich |  | Laengle | Wiener Neustadt | | Landesklinikum Wiener Neustadt | | Austria | | local co-ordinator |
| Thomas |  | Mayrhofer | Zwettl | | Landesklinikum Zwettl | | Austria | | local co-ordinator |
| Christian |  | Buerkle | Feldkirch | | Landeskrankenhaus Feldkirch | | Austria | | Local investigator |
| Karin |  | Forstner | Feldkirch | | Landeskrankenhaus Feldkirch | | Austria | | Local investigator |
| Reinhard |  | Germann | Feldkirch | | Landeskrankenhaus Feldkirch | | Austria | | local co-ordinator |
| Harald |  | Rinoesl | Feldkirch | | Landeskrankenhaus Feldkirch | | Austria | | Local investigator |
| Elke |  | Schindler | Villach | | Landeskrankenhaus Villach | | Austria | | Local investigator |
| Ernst |  | Trampitsch | Villach | | Landeskrankenhaus Villach | | Austria | | local co-ordinator |
| Gerhard |  | Fritsch | Salzburg | | Salzburger Landeskliniken | | Austria | | local co-ordinator |
| Christian |  | Szabo | Namur | | Centre Hospitalier Régional de Namur | | Belgium | | local co-ordinator |
| Jawad |  | Bidgoli | Brussels | | Centre Hospitalier Universitaire Brugmann | | Belgium | | local co-ordinator |
| Hans |  | Verdoodt | Brussels | | Centre Hospitalier Universitaire Brugmann | | Belgium | | Local investigator |
| Patrice |  | Forget | Woluwe-Saint-Lambert | | Cliniques Universitaires Saint-Luc | | Belgium | | Local investigator |
| David |  | Kahn | Woluwe-Saint-Lambert | | Cliniques Universitaires Saint-Luc | | Belgium | | local co-ordinator |
| Fernande |  | Lois | Woluwe-Saint-Lambert | | Cliniques Universitaires Saint-Luc | | Belgium | | Local investigator |
| Mona |  | Momeni | Woluwe-Saint-Lambert | | Cliniques Universitaires Saint-Luc | | Belgium | | Local investigator |
| Caroline |  | Prégardien | Woluwe-Saint-Lambert | | Cliniques Universitaires Saint-Luc | | Belgium | | Local investigator |
| Audrey |  | Pospiech | Woluwe-Saint-Lambert | | Cliniques Universitaires Saint-Luc | | Belgium | | Local investigator |
| Arnaud |  | Steyaert | Woluwe-Saint-Lambert | | Cliniques Universitaires Saint-Luc | | Belgium | | Local investigator |
| Laurent |  | Veevaete | Woluwe-Saint-Lambert | | Cliniques Universitaires Saint-Luc | | Belgium | | Local investigator |
| Dirk |  | De Kegel | Roeselare | | Heilig Hart Ziekenhuis Roeselaere | | Belgium | | local co-ordinator |
| Karen |  | De Jongh | Aalst | | Onze Lieve Vrouw Ziekenhuis Aalst | | Belgium | | Local investigator |
| Luc |  | Foubert | Aalst | | Onze Lieve Vrouw Ziekenhuis Aalst | | Belgium | | local co-ordinator |
| Carine |  | Smitz | Antwerp | | Universitair Ziekenhuis Antwerpen | | Belgium | | Local investigator |
| Marcel |  | Vercauteren | Antwerp | | Universitair Ziekenhuis Antwerpen | | Belgium | | local co-ordinator |
| Jan |  | Poelaert | Brussels | | Universitair Ziekenhuis Brussel | | Belgium | | local co-ordinator |
| Veerle |  | Van Mossevelde | Brussels | | Universitair Ziekenhuis Brussel | | Belgium | | Local investigator |
| Jacques |  | Abeloos | Gent | | Universitair Ziekenhuis Gent | | Belgium | | Local investigator |
| Stefaan |  | Bouchez | Gent | | Universitair Ziekenhuis Gent | | Belgium | | Local investigator |
| Marc |  | Coppens | Gent | | Universitair Ziekenhuis Gent | | Belgium | | Local investigator |
| Luc |  | De Baerdemaeker | Gent | | Universitair Ziekenhuis Gent | | Belgium | | Local investigator |
| Isabel |  | Deblaere | Gent | | Universitair Ziekenhuis Gent | | Belgium | | Local investigator |
| Ann |  | De Bruyne | Gent | | Universitair Ziekenhuis Gent | | Belgium | | local co-ordinator |
| Stefan |  | De Hert | Gent | | Universitair Ziekenhuis Gent | | Belgium | | local co-ordinator |
| Kristine |  | Fonck | Gent | | Universitair Ziekenhuis Gent | | Belgium | | Local investigator |
| Bjorn |  | Heyse | Gent | | Universitair Ziekenhuis Gent | | Belgium | | Local investigator |
| Tom |  | Jacobs | Gent | | Universitair Ziekenhuis Gent | | Belgium | | Local investigator |
| Koen |  | Lapage | Gent | | Universitair Ziekenhuis Gent | | Belgium | | Local investigator |
| Anneliese |  | Moerman | Gent | | Universitair Ziekenhuis Gent | | Belgium | | Local investigator |
| Martine |  | Neckebroek | Gent | | Universitair Ziekenhuis Gent | | Belgium | | Local investigator |
| Aliaksandra |  | Parashchanka | Gent | | Universitair Ziekenhuis Gent | | Belgium | | Local investigator |
| Nathalie |  | Roels | Gent | | Universitair Ziekenhuis Gent | | Belgium | | Local investigator |
| Nancy |  | Van Den Eynde | Gent | | Universitair Ziekenhuis Gent | | Belgium | | Local investigator |
| Michael |  | Vandenheuvel | Gent | | Universitair Ziekenhuis Gent | | Belgium | | Local investigator |
| Jurgen |  | Van Limmen | Gent | | Universitair Ziekenhuis Gent | | Belgium | | Local investigator |
| Ann |  | Vanluchene | Gent | | Universitair Ziekenhuis Gent | | Belgium | | Local investigator |
| Caroline |  | Vanpeteghem | Gent | | Universitair Ziekenhuis Gent | | Belgium | | Local investigator |
| Patrick |  | Wouters | Gent | | Universitair Ziekenhuis Gent | | Belgium | | local co-ordinator |
| Piet |  | Wyffels | Gent | | Universitair Ziekenhuis Gent | | Belgium | | Local investigator |
| Christel |  | Huygens | Leuven | | Universitair Ziekenhuis Leuven | | Belgium | | Local investigator |
| Punitha |  | Vandenbempt | Leuven | | Universitair Ziekenhuis Leuven | | Belgium | | Local investigator |
| Marc |  | Van de Velde | Leuven | | Universitair Ziekenhuis Leuven | | Belgium | | local co-ordinator |
| Dimitri |  | Dylst | Genk | | Ziekenhuis Oost Limburg campus St-Jan Genk | | Belgium | | local co-ordinator |
| Bruno |  | Janssen | Genk | | Ziekenhuis Oost Limburg campus St-Jan Genk | | Belgium | | Local investigator |
| Evelien |  | Schreurs | Genk | | Ziekenhuis Oost Limburg campus St-Jan Genk | | Belgium | | Local investigator |
| Fábia | Berganton | Aleixo | São José do Rio Preto | | Faculdade de Medicina e Hospital de Base de São José do Rio preto - SP | | Brazil | | Local investigator |
| Keulle |  | Candido | São José do Rio Preto | | Faculdade de Medicina e Hospital de Base de São José do Rio preto - SP | | Brazil | | Local investigator |
| Hugo |  | Dias Batista | São José do Rio Preto | | Faculdade de Medicina e Hospital de Base de São José do Rio preto - SP | | Brazil | | Local investigator |
| Mario |  | Guimarães | São José do Rio Preto | | Faculdade de Medicina e Hospital de Base de São José do Rio preto - SP | | Brazil | | Local investigator |
| Jaqueline |  | Guizeline | São José do Rio Preto | | Faculdade de Medicina e Hospital de Base de São José do Rio preto - SP | | Brazil | | Local investigator |
| João |  | Hoffmann | São José do Rio Preto | | Faculdade de Medicina e Hospital de Base de São José do Rio preto - SP | | Brazil | | Local investigator |
| Suzana | M | Lobo | São José do Rio Preto | | Faculdade de Medicina e Hospital de Base de São José do Rio preto - SP | | Brazil | | Local co-ordinator |
| Francisco | Ricardo | Lobo | São José do Rio Preto | | Faculdade de Medicina e Hospital de Base de São José do Rio preto - SP | | Brazil | | Local investigator |
| Vinícius |  | Nascimento | São José do Rio Preto | | Faculdade de Medicina e Hospital de Base de São José do Rio preto - SP | | Brazil | | Local investigator |
| Katia |  | Nishiyama | São José do Rio Preto | | Faculdade de Medicina e Hospital de Base de São José do Rio preto - SP | | Brazil | | Local investigator |
| Lucas |  | Pazetto | São José do Rio Preto | | Faculdade de Medicina e Hospital de Base de São José do Rio preto - SP | | Brazil | | Local investigator |
| Daniela |  | Souza | São José do Rio Preto | | Faculdade de Medicina e Hospital de Base de São José do Rio preto - SP | | Brazil | | Local investigator |
| Rodrigo |  | Souza Rodrigues | São José do Rio Preto | | Faculdade de Medicina e Hospital de Base de São José do Rio preto - SP | | Brazil | | Local investigator |
| Ana Maria |  | Vilela dos Santos | São José do Rio Preto | | Faculdade de Medicina e Hospital de Base de São José do Rio preto - SP | | Brazil | | Local investigator |
| Jaquelline |  | Jardim | Sao Paulo | | Hospital das Clinicas da faculdade de Medicina da Universidade de Sao Paulo | | Brazil | | Local investigator |
| Joao |  | Silva | Sao Paulo | | Hospital das Clinicas da faculdade de Medicina da Universidade de Sao Paulo | | Brazil | | Local co-ordinator |
| Paulo |  | do Nascimento Junior | Botucatu | | Hospital das Clínicas da Faculdade de Medicina de Botucatu | | Brazil | | Local co-ordinator |
| Thalissa | Hermínia | Baio | Botucatu | | Hospital das Clínicas da Faculdade de Medicina de Botucatu | | Brazil | | Local investigator |
| Gabriel | Isaac | Pereira de Castro | Botucatu | | Hospital das Clínicas da Faculdade de Medicina de Botucatu | | Brazil | | Local investigator |
| Henri | Roger | Watanabe Oliveira | Botucatu | | Hospital das Clínicas da Faculdade de Medicina de Botucatu | | Brazil | | Local investigator |
| Cristina | Prata | Amendola | Barretos | | Hospital de Câncer de Barretos Fundação PIO XII | | Brazil | | Local co-ordinator |
| Gutemberg |  | Cardoso | São Paulo | | Hospital Do Servidor Público Estadual De São Paulo | | Brazil | | Local co-ordinator |
| Daniela |  | Ortega | São Paulo | | Hospital Do Servidor Público Estadual De São Paulo | | Brazil | | Local investigator |
| Ana | Flavia | Brotto | Curitiba | | Hospital do Trabalhador | | Brazil | | Local co-ordinator |
| Mirella | Cristine | De Oliveira | Curitiba | | Hospital do Trabalhador | | Brazil | | Local investigator |
| Álvaro |  | Réa-Neto | Curitiba | | Hospital do Trabalhador | | Brazil | | Local investigator |
| Fernando |  | Dias | Caxias do Sul | | Hospital Pompéia de Caxias do Sul | | Brazil | | Local co-ordinator |
| Pedro |  | Azambuja | Porto Alegre | | Hospital São Lucas | | Brazil | | Local investigator |
| Marcos | Freitas | Knibel | Porto Alegre | | Hospital São Lucas | | Brazil | | Local co-ordinator |
| Antonio |  | Martins | Porto Alegre | | Hospital São Lucas | | Brazil | | Local investigator |
| William |  | Almeida | São Paulo | | Hospital São Paulo-UNIFESP | | Brazil | | Local investigator |
| Calim | Neder | Neto | São Paulo | | Hospital São Paulo-UNIFESP | | Brazil | | Local investigator |
| Maria | Angela | Tardelli | São Paulo | | Hospital São Paulo-UNIFESP | | Brazil | | Local co-ordinator |
| Eliana |  | Caser | Vitória | | Hospital Unimed de Vitória | | Brazil | | Local co-ordinator |
| Marcio |  | Machado | Vitória | | Hospital Unimed de Vitória | | Brazil | | Local investigator |
| Crisitiano |  | Aguzzoli | Porto Alegre | | Hospital São Lucas – PUCRS | | Brazil | | Local investigator |
| Sérgio |  | Baldisserotto | Porto Alegre | | Hospital São Lucas – PUCRS | | Brazil | | Local co-ordinator |
| Fernanda |  | Beck Tabajara | Porto Alegre | | Hospital São Lucas – PUCRS | | Brazil | | Local investigator |
| Fernanda |  | Bettega | Porto Alegre | | Hospital São Lucas – PUCRS | | Brazil | | Local investigator |
| La Hore | Correa | Rodrigues Júnior | Porto Alegre | | Hospital São Lucas – PUCRS | | Brazil | | Local investigator |
| Julia |  | de Gasperi | Porto Alegre | | Hospital São Lucas – PUCRS | | Brazil | | Local investigator |
| Lais |  | Faina | Porto Alegre | | Hospital São Lucas – PUCRS | | Brazil | | Local investigator |
| Marcos | Farias | Nolasco | Porto Alegre | | Hospital São Lucas – PUCRS | | Brazil | | Local investigator |
| Bruna | Ferreira | da Costa Fischer | Porto Alegre | | Hospital São Lucas – PUCRS | | Brazil | | Local investigator |
| Mariana | Fosch | de Campos Ferreira | Porto Alegre | | Hospital São Lucas – PUCRS | | Brazil | | Local investigator |
| Cristina |  | Hartmann | Porto Alegre | | Hospital São Lucas – PUCRS | | Brazil | | Local investigator |
| Marta |  | Kliemann | Porto Alegre | | Hospital São Lucas – PUCRS | | Brazil | | Local investigator |
| Gustavo | Luis Hubert | Ribeiro | Porto Alegre | | Hospital São Lucas – PUCRS | | Brazil | | Local investigator |
| Julia | Merladete | Fraga | Porto Alegre | | Hospital São Lucas – PUCRS | | Brazil | | Local investigator |
| Thiago | Motta | Netto | Porto Alegre | | Hospital São Lucas – PUCRS | | Brazil | | Local investigator |
| Laura | Valduga | Pozza | Porto Alegre | | Hospital São Lucas – PUCRS | | Brazil | | Local investigator |
| Paulo | Rafael | Wendling | Porto Alegre | | Hospital São Lucas – PUCRS | | Brazil | | Local investigator |
| Caroline |  | Azevedo | Passos | | Santa Casa de Misericórdia de Passos | | Brazil | | Local investigator |
| Juliana |  | Garcia | Passos | | Santa Casa de Misericórdia de Passos | | Brazil | | Local investigator |
| Marcel |  | Lopes | Passos | | Santa Casa de Misericórdia de Passos | | Brazil | | Local co-ordinator |
| Bernardo |  | Maia | Passos | | Santa Casa de Misericórdia de Passos | | Brazil | | Local investigator |
| Paula |  | Maselli | Passos | | Santa Casa de Misericórdia de Passos | | Brazil | | Local investigator |
| Ralph |  | Melo | Passos | | Santa Casa de Misericórdia de Passos | | Brazil | | Local investigator |
| Weslley |  | Mendes | Passos | | Santa Casa de Misericórdia de Passos | | Brazil | | Local investigator |
| Matheus |  | Neves | Passos | | Santa Casa de Misericórdia de Passos | | Brazil | | Local investigator |
| Jacqueline |  | Ney | Serra | | Vitoria Apart Hospital | | Brazil | | Local investigator |
| Claudio |  | Piras | Serra | | Vitoria Apart Hospital | | Brazil | | Local co-ordinator |
| Christopher |  | Applewhaite | Calgary | | Foothills Medical Centre | | Canada | | Local investigator |
| Adrienne |  | Carr | Calgary | | Foothills Medical Centre | | Canada | | Local investigator |
| Lorraine |  | Chow | Calgary | | Foothills Medical Centre | | Canada | | Local investigator |
| Kaylene |  | Duttchen | Calgary | | Foothills Medical Centre | | Canada | | Local co-ordinator |
| Julena |  | Foglia | Calgary | | Foothills Medical Centre | | Canada | | Local investigator |
| Michael |  | Greene | Calgary | | Foothills Medical Centre | | Canada | | Local investigator |
| Ashley |  | Hinther | Calgary | | Foothills Medical Centre | | Canada | | Local investigator |
| Kendra |  | Houston | Calgary | | Foothills Medical Centre | | Canada | | Local investigator |
| Thomas | Jared | McCormick | Calgary | | Foothills Medical Centre | | Canada | | Local investigator |
| Jennifer |  | Mikhayel | Calgary | | Foothills Medical Centre | | Canada | | Local investigator |
| Sam |  | Montasser | Calgary | | Foothills Medical Centre | | Canada | | Local investigator |
| Alex |  | Ragan | Calgary | | Foothills Medical Centre | | Canada | | Local investigator |
| Andrew |  | Suen | Calgary | | Foothills Medical Centre | | Canada | | Local co-ordinator |
| Adrianna |  | Woolsey | Calgary | | Foothills Medical Centre | | Canada | | Local investigator |
| Hai | Chuan | Yu | Calgary | | Foothills Medical Centre | | Canada | | Local investigator |
| Duane |  | Funk | Winnipeg | | Health Science Centre (Winnipeg, Manitoba) | | Canada | | Local investigator |
| Stephen |  | Kowalski | Winnipeg | | Health Science Centre (Winnipeg, Manitoba) | | Canada | | Local co-ordinator |
| Regina |  | Legaspi | Winnipeg | | Health Science Centre (Winnipeg, Manitoba) | | Canada | | Local investigator |
| Heather |  | McDonald | Winnipeg | | Health Science Centre (Winnipeg, Manitoba) | | Canada | | Local investigator |
| Faisal |  | Siddiqui | Winnipeg | | Health Science Centre (Winnipeg, Manitoba) | | Canada | | Local investigator |
| Jeremy |  | Pridham | St. John' | | Health Sciences Centre (St John) | | Canada | | Local investigator |
| Bernadette |  | Rowe | St. John' | | Health Sciences Centre (St John) | | Canada | | Local investigator |
| Sonia |  | Sampson | St. John' | | Health Sciences Centre (St John) | | Canada | | Local co-ordinator |
| Barton |  | Thiessen | St. John' | | Health Sciences Centre (St John) | | Canada | | Local investigator |
| Geoff |  | Zbitnew | St. John' | | Health Sciences Centre (St John) | | Canada | | Local investigator |
| Andre |  | Bernard | Halifax | | IWK Health Centre | | Canada | | Local investigator |
| Ronald |  | George | Halifax | | IWK Health Centre | | Canada | | Local co-ordinator |
| Philip |  | Jones | London | | London Health Science Centre - University Hospital | | Canada | | Local co-ordinator |
| Rita |  | Moor | London | | London Health Science Centre - University Hospital | | Canada | | Local investigator |
| Naveed |  | Siddiqui | Toronto | | Mount Sinai Hospital | | Canada | | Local co-ordinator |
| Alexandra |  | Wolfer | Toronto | | Mount Sinai Hospital | | Canada | | Local investigator |
| Diem |  | Tran | Ottawa | | Ottawa Heart Institute | | Canada | | Local co-ordinator |
| Denyse |  | Winch | Ottawa | | Ottawa Heart Institute | | Canada | | Local investigator |
| Gary |  | Dobson | Calgary | | Peter Lougheed Medical Centre | | Canada | | Local co-ordinator |
| Ashley |  | Hinther | Calgary | | Peter Lougheed Medical Centre | | Canada | | Local investigator |
| Thomas |  | McCormick | Calgary | | Peter Lougheed Medical Centre | | Canada | | Local investigator |
| Osama |  | Montasser | Calgary | | Peter Lougheed Medical Centre | | Canada | | Local investigator |
| Andrew |  | Suen | Calgary | | Peter Lougheed Medical Centre | | Canada | | Local co-ordinator |
| Adrianna |  | Woolsey | Calgary | | Peter Lougheed Medical Centre | | Canada | | Local investigator |
| Andre |  | Bernard | Halifax | | QEII Health Sciences Centre (Halifax Infirmary site) | | Canada | | Local investigator |
| Ronald |  | George | Halifax | | QEII Health Sciences Centre (Halifax Infirmary site) | | Canada | | Local co-ordinator |
| Richard |  | Hall | Halifax | | QEII Health Sciences Centre (Halifax Infirmary site) | | Canada | | Local investigator |
| Andre |  | Bernard | Halifax | | QEII Health Sciences Centre (Victoria General site) | | Canada | | Local investigator |
| Ronald |  | George | Halifax | | QEII Health Sciences Centre (Victoria General site) | | Canada | | Local co-ordinator |
| Richard |  | Hall | Halifax | | QEII Health Sciences Centre (Victoria General site) | | Canada | | Local investigator |
| Christopher |  | Applewhaite | Calgary | | South Health Campus | | Canada | | Local investigator |
| Leyla |  | Baghirzada | Calgary | | South Health Campus | | Canada | | Local co-ordinator |
| Thomas | Jared | McCormick | Calgary | | South Health Campus | | Canada | | Local investigator |
| Andrew |  | Suen | Calgary | | South Health Campus | | Canada | | Local co-ordinator |
| Si | Yuan | Dai | Toronto | | St. Michael’s Hospital | | Canada | | Local investigator |
| Gregory |  | Hare | Toronto | | St. Michael’s Hospital | | Canada | | Local co-ordinator |
| Esther |  | Lee | Toronto | | St. Michael’s Hospital | | Canada | | Local investigator |
| Uma |  | Shastri | Toronto | | St. Michael’s Hospital | | Canada | | Local investigator |
| Albert |  | Tsui | Toronto | | St. Michael’s Hospital | | Canada | | Local investigator |
| Anmol |  | Yagnik | Toronto | | St. Michael’s Hospital | | Canada | | Local investigator |
| Danielle |  | Alvares | Toronto | | Sunnybrook Health Sciences Centre | | Canada | | Local investigator |
| Stephen |  | Choi | Toronto | | Sunnybrook Health Sciences Centre | | Canada | | Local investigator |
| Heather |  | Dwyer | Toronto | | Sunnybrook Health Sciences Centre | | Canada | | Local investigator |
| Kathrina |  | Flores | Toronto | | Sunnybrook Health Sciences Centre | | Canada | | Local investigator |
| Colin |  | McCartney | Toronto | | Sunnybrook Health Sciences Centre | | Canada | | Local co-ordinator |
| Priya |  | Somascanthan | Toronto | | Sunnybrook Health Sciences Centre | | Canada | | Local investigator |
| Scott |  | Beattie | Toronto | | Toronto General Hospital | | Canada | | Local co-ordinator |
| Jo |  | Carroll | Toronto | | Toronto General Hospital | | Canada | | Local investigator |
| Janneth |  | Pazmino-Canizares | Toronto | | Toronto General Hospital | | Canada | | Local investigator |
| Duminda |  | Wijeysundera | Toronto | | Toronto General Hospital | | Canada | | Local investigator |
| Alexandra |  | Wolfer | Toronto | | Toronto General Hospital | | Canada | | Local investigator |
| Noam |  | Ami | Toronto | | Toronto Western Hospital | | Canada | | Local investigator |
| Vincent |  | Chan | Toronto | | Toronto Western Hospital | | Canada | | Local investigator |
| Anahi |  | Perlas | Toronto | | Toronto Western Hospital | | Canada | | Local co-ordinator |
| Ruth |  | Argue | Vancouver | | Vancouver General Hospital | | Canada | | Local investigator |
| Katie |  | Lavis | Vancouver | | Vancouver General Hospital | | Canada | | Local investigator |
| Kelly |  | Mayson | Vancouver | | Vancouver General Hospital | | Canada | | Local co-ordinator |
| Ying |  | Cao | Guiyang Shi | | Affiliated Hospital of Guiyang Medical College | | China | | Local investigator |
| Hong |  | Gao | Guiyang Shi | | Affiliated Hospital of Guiyang Medical College | | China | | Local co-ordinator |
| tingju |  | hu | Guiyang Shi | | Affiliated Hospital of Guiyang Medical College | | China | | Local investigator |
| Jie |  | Lv | Guiyang Shi | | Affiliated Hospital of Guiyang Medical College | | China | | Local investigator |
| Jian |  | Yang | Guiyang Shi | | Affiliated Hospital of Guiyang Medical College | | China | | Local investigator |
| Yang |  | Yang | Guiyang Shi | | Affiliated Hospital of Guiyang Medical College | | China | | Local investigator |
| Yi |  | Zhong | Guiyang Shi | | Affiliated Hospital of Guiyang Medical College | | China | | Local investigator |
| Jing |  | Zhou | Guiyang Shi | | Affiliated Hospital of Guiyang Medical College | | China | | Local investigator |
| Xiaohua |  | Zou | Guiyang Shi | | Affiliated Hospital of Guiyang Medical College | | China | | Local investigator |
| Miao |  | He | Zunyi Shi | | Affiliated Hospital of Zunyi Medical College | | China | | Local investigator |
| Xiaoying |  | Li | Zunyi Shi | | Affiliated Hospital of Zunyi Medical College | | China | | Local investigator |
| Dihuan |  | Luo | Zunyi Shi | | Affiliated Hospital of Zunyi Medical College | | China | | Local investigator |
| Haiying |  | Wang | Zunyi Shi | | Affiliated Hospital of Zunyi Medical College | | China | | Local co-ordinator |
| Tian |  | Yu | Zunyi Shi | | Affiliated Hospital of Zunyi Medical College | | China | | Local co-ordinator |
| Liyong |  | Chen | Chongqing | | Daping Hospital & Research Institute of Surgery of the Third Military Medical University | | China | | Local co-ordinator |
| Lijun |  | Wang | Chongqing | | Daping Hospital & Research Institute of Surgery of the Third Military Medical University | | China | | Local investigator |
| Yunfei |  | Cai | Guangzhou Shi | | Guangdong Provincial People’s Hospital | | China | | Local investigator |
| Zhongming |  | Cao | Guangzhou Shi | | Guangdong Provincial People’s Hospital | | China | | Local investigator |
| Yanling |  | Li | Guangzhou Shi | | Guangdong Provincial People’s Hospital | | China | | Local investigator |
| Jiaxin |  | Lian | Guangzhou Shi | | Guangdong Provincial People’s Hospital | | China | | Local investigator |
| Haiyun |  | Sun | Guangzhou Shi | | Guangdong Provincial People’s Hospital | | China | | Local investigator |
| Sheng |  | Wang | Guangzhou Shi | | Guangdong Provincial People’s Hospital | | China | | Local co-ordinator |
| Zhipeng |  | Wang | Guangzhou Shi | | Guangdong Provincial People’s Hospital | | China | | Local investigator |
| Kenru |  | Wang | Guangzhou Shi | | Guangdong Provincial People’s Hospital | | China | | Local investigator |
| Yi |  | Zhu | Guangzhou Shi | | Guangdong Provincial People’s Hospital | | China | | Local investigator |
| Xindan |  | Du | Hangzhou Shi | | Hangzhou Red-cross Hospital | | China | | Local investigator |
| Hao |  | Fan | Hangzhou Shi | | Hangzhou Red-cross Hospital | | China | | Local investigator |
| Yunbin |  | Fu | Hangzhou Shi | | Hangzhou Red-cross Hospital | | China | | Local investigator |
| Lixia |  | Huang | Hangzhou Shi | | Hangzhou Red-cross Hospital | | China | | Local investigator |
| Yanming |  | Huang | Hangzhou Shi | | Hangzhou Red-cross Hospital | | China | | Local investigator |
| Haifang |  | Hwan | Hangzhou Shi | | Hangzhou Red-cross Hospital | | China | | Local investigator |
| Hong |  | Luo | Hangzhou Shi | | Hangzhou Red-cross Hospital | | China | | Local investigator |
| Pi-Sheng |  | Qu | Hangzhou Shi | | Hangzhou Red-cross Hospital | | China | | Local investigator |
| Fan |  | Tao | Hangzhou Shi | | Hangzhou Red-cross Hospital | | China | | Local co-ordinator |
| Zhen |  | Wang | Hangzhou Shi | | Hangzhou Red-cross Hospital | | China | | Local investigator |
| Guoxiang |  | Wang | Hangzhou Shi | | Hangzhou Red-cross Hospital | | China | | Local co-ordinator |
| Shun |  | Wang | Hangzhou Shi | | Hangzhou Red-cross Hospital | | China | | Local investigator |
| Yan |  | Zhang | Hangzhou Shi | | Hangzhou Red-cross Hospital | | China | | Local investigator |
| Xiaolin |  | Zhang | Hangzhou Shi | | Hangzhou Red-cross Hospital | | China | | Local investigator |
| Chao |  | Chen | Huzhou Shi | | Huzhou Central Hospital | | China | | Local investigator |
| Weixing |  | Wang | Huzhou Shi | | Huzhou Central Hospital | | China | | Local co-ordinator |
| Zhengyuan |  | Liu | Ningbo Shi | | Lihuili Hospital, School of Medicine, Ningbo University | | China | | Local co-ordinator |
| Lihua |  | Fan | Lishui Shi | | Lishui People’s Hospital of Zhejiang Province | | China | | Local co-ordinator |
| Jing |  | Tang | Guangzhou Shi | | Nanfang Hospital of Southern Medical University | | China | | Local co-ordinator |
| Yijun |  | Chen | Ningbo Shi | | Ningbo Number 1 Hospital of Zhejiang Province | | China | | Local investigator |
| Yongjie |  | Chen | Ningbo Shi | | Ningbo Number 1 Hospital of Zhejiang Province | | China | | Local investigator |
| Yangyang |  | Han | Ningbo Shi | | Ningbo Number 1 Hospital of Zhejiang Province | | China | | Local investigator |
| Changshun |  | Huang | Ningbo Shi | | Ningbo Number 1 Hospital of Zhejiang Province | | China | | Local co-ordinator |
| Guojin |  | Liang | Ningbo Shi | | Ningbo Number 1 Hospital of Zhejiang Province | | China | | Local investigator |
| Jing |  | Shen | Ningbo Shi | | Ningbo Number 1 Hospital of Zhejiang Province | | China | | Local investigator |
| Jun |  | Wang | Ningbo Shi | | Ningbo Number 1 Hospital of Zhejiang Province | | China | | Local investigator |
| Qiuhong |  | Yang | Ningbo Shi | | Ningbo Number 1 Hospital of Zhejiang Province | | China | | Local investigator |
| Jungang |  | Zhen | Ningbo Shi | | Ningbo Number 1 Hospital of Zhejiang Province | | China | | Local investigator |
| Haidong |  | Zhou | Ningbo Shi | | Ningbo Number 1 Hospital of Zhejiang Province | | China | | Local investigator |
| Junping |  | Chen | Ningbo Shi | | Ningbo Number 2 Hospital of Zhejiang Province | | China | | Local co-ordinator |
| Zhang |  | Chen | Ningbo Shi | | Ningbo Number 2 Hospital of Zhejiang Province | | China | | Local investigator |
| Xiaoyu |  | Li | Ningbo Shi | | Ningbo Number 2 Hospital of Zhejiang Province | | China | | Local investigator |
| Bo |  | Meng | Ningbo Shi | | Ningbo Number 2 Hospital of Zhejiang Province | | China | | Local investigator |
| Haiwang |  | Ye | Ningbo Shi | | Ningbo Number 2 Hospital of Zhejiang Province | | China | | Local investigator |
| Xiaoyan |  | Zhang | Ningbo Shi | | Ningbo Number 2 Hospital of Zhejiang Province | | China | | Local investigator |
| Yanbing |  | Bi | Jinan Shi | | Qianfoshan Hospital Affiliated to Shandong University | | China | | Local investigator |
| Jianqiao |  | Cao | Jinan Shi | | Qianfoshan Hospital Affiliated to Shandong University | | China | | Local investigator |
| Fengying |  | Guo | Jinan Shi | | Qianfoshan Hospital Affiliated to Shandong University | | China | | Local investigator |
| Hong |  | Lin | Jinan Shi | | Qianfoshan Hospital Affiliated to Shandong University | | China | | Local investigator |
| Yang |  | Liu | Jinan Shi | | Qianfoshan Hospital Affiliated to Shandong University | | China | | Local investigator |
| Meng |  | Lv | Jinan Shi | | Qianfoshan Hospital Affiliated to Shandong University | | China | | Local investigator |
| Pengcai |  | Shi | Jinan Shi | | Qianfoshan Hospital Affiliated to Shandong University | | China | | Local investigator |
| Xiumei |  | Song | Jinan Shi | | Qianfoshan Hospital Affiliated to Shandong University | | China | | Local investigator |
| Chuanyu |  | Sun | Jinan Shi | | Qianfoshan Hospital Affiliated to Shandong University | | China | | Local investigator |
| Yongtao |  | Sun | Jinan Shi | | Qianfoshan Hospital Affiliated to Shandong University | | China | | Local investigator |
| Yuelan |  | Wang | Jinan Shi | | Qianfoshan Hospital Affiliated to Shandong University | | China | | Local co-ordinator |
| Shenhui |  | Wang | Jinan Shi | | Qianfoshan Hospital Affiliated to Shandong University | | China | | Local investigator |
| Min |  | Zhang | Jinan Shi | | Qianfoshan Hospital Affiliated to Shandong University | | China | | Local investigator |
| Rong |  | Chen | Wuhan Shi | | Renmin Hospital of Wuhan University | | China | | Local investigator |
| Jiabao |  | Hou | Wuhan Shi | | Renmin Hospital of Wuhan University | | China | | Local investigator |
| Yan |  | Leng | Wuhan Shi | | Renmin Hospital of Wuhan University | | China | | Local investigator |
| Qing-tao |  | Meng | Wuhan Shi | | Renmin Hospital of Wuhan University | | China | | Local investigator |
| Li |  | Qian | Wuhan Shi | | Renmin Hospital of Wuhan University | | China | | Local investigator |
| Zi-ying |  | Shen | Wuhan Shi | | Renmin Hospital of Wuhan University | | China | | Local investigator |
| Zhong-yuan |  | Xia | Wuhan Shi | | Renmin Hospital of Wuhan University | | China | | Local co-ordinator |
| Rui |  | Xue | Wuhan Shi | | Renmin Hospital of Wuhan University | | China | | Local investigator |
| Yuan |  | Zhang | Wuhan Shi | | Renmin Hospital of Wuhan University | | China | | Local investigator |
| Bo |  | Zhao | Wuhan Shi | | Renmin Hospital of Wuhan University | | China | | Local investigator |
| Xian-jin |  | Zhou | Wuhan Shi | | Renmin Hospital of Wuhan University | | China | | Local investigator |
| Qiang |  | Chen | Xi'an | | Shanxi Provincial People’s Hospital | | China | | Local investigator |
| Huinan |  | Guo | Xi'an | | Shanxi Provincial People’s Hospital | | China | | Local investigator |
| Yongqing |  | Guo | Xi'an | | Shanxi Provincial People’s Hospital | | China | | Local investigator |
| Yuehong |  | Qi | Xi'an | | Shanxi Provincial People’s Hospital | | China | | Local co-ordinator |
| Zhi |  | Wang | Xi'an | | Shanxi Provincial People’s Hospital | | China | | Local investigator |
| Jianfeng |  | Wei | Xi'an | | Shanxi Provincial People’s Hospital | | China | | Local investigator |
| Weiwei |  | Zhang | Xi'an | | Shanxi Provincial People’s Hospital | | China | | Local investigator |
| Lina |  | Zheng | Xi'an | | Shanxi Provincial People’s Hospital | | China | | Local investigator |
| Qi |  | Bao | Hangzhou | | Sir Run Run Shaw Hospital, School of Medicine, Zhejiang University | | China | | Local investigator |
| Yaqiu |  | Chen | Hangzhou | | Sir Run Run Shaw Hospital, School of Medicine, Zhejiang University | | China | | Local investigator |
| Yijiao |  | Chen | Hangzhou | | Sir Run Run Shaw Hospital, School of Medicine, Zhejiang University | | China | | Local investigator |
| Yue |  | Fei | Hangzhou | | Sir Run Run Shaw Hospital, School of Medicine, Zhejiang University | | China | | Local investigator |
| Nianqiang |  | Hu | Hangzhou | | Sir Run Run Shaw Hospital, School of Medicine, Zhejiang University | | China | | Local investigator |
| Xuming |  | Hu | Hangzhou | | Sir Run Run Shaw Hospital, School of Medicine, Zhejiang University | | China | | Local investigator |
| Min |  | Lei | Hangzhou | | Sir Run Run Shaw Hospital, School of Medicine, Zhejiang University | | China | | Local investigator |
| Xiaoqin |  | Li | Hangzhou | | Sir Run Run Shaw Hospital, School of Medicine, Zhejiang University | | China | | Local investigator |
| Xiaocui |  | Lv | Hangzhou | | Sir Run Run Shaw Hospital, School of Medicine, Zhejiang University | | China | | Local investigator |
| Jie |  | Lv | Hangzhou | | Sir Run Run Shaw Hospital, School of Medicine, Zhejiang University | | China | | Local investigator |
| Fangfang |  | Miao | Hangzhou | | Sir Run Run Shaw Hospital, School of Medicine, Zhejiang University | | China | | Local investigator |
| Lingling |  | Ouyang | Hangzhou | | Sir Run Run Shaw Hospital, School of Medicine, Zhejiang University | | China | | Local investigator |
| Lu |  | Qian | Hangzhou | | Sir Run Run Shaw Hospital, School of Medicine, Zhejiang University | | China | | Local investigator |
| Conyu |  | Shen | Hangzhou | | Sir Run Run Shaw Hospital, School of Medicine, Zhejiang University | | China | | Local investigator |
| Yu |  | Sun | Hangzhou | | Sir Run Run Shaw Hospital, School of Medicine, Zhejiang University | | China | | Local investigator |
| Yuting |  | Wang | Hangzhou | | Sir Run Run Shaw Hospital, School of Medicine, Zhejiang University | | China | | Local investigator |
| Dong |  | Wang | Hangzhou | | Sir Run Run Shaw Hospital, School of Medicine, Zhejiang University | | China | | Local investigator |
| Chao |  | Wu | Hangzhou | | Sir Run Run Shaw Hospital, School of Medicine, Zhejiang University | | China | | Local investigator |
| Liyuan |  | Xu | Hangzhou | | Sir Run Run Shaw Hospital, School of Medicine, Zhejiang University | | China | | Local investigator |
| Jiaqi |  | Yuan | Hangzhou | | Sir Run Run Shaw Hospital, School of Medicine, Zhejiang University | | China | | Local investigator |
| Lina |  | Zhang | Hangzhou | | Sir Run Run Shaw Hospital, School of Medicine, Zhejiang University | | China | | Local investigator |
| Huan |  | Zhang | Hangzhou | | Sir Run Run Shaw Hospital, School of Medicine, Zhejiang University | | China | | Local investigator |
| Yapping |  | Zhang | Hangzhou | | Sir Run Run Shaw Hospital, School of Medicine, Zhejiang University | | China | | Local investigator |
| Jinning |  | Zhao | Hangzhou | | Sir Run Run Shaw Hospital, School of Medicine, Zhejiang University | | China | | Local investigator |
| Chong |  | Zhao | Hangzhou | | Sir Run Run Shaw Hospital, School of Medicine, Zhejiang University | | China | | Local investigator |
| Lei |  | Zhao | Hangzhou | | Sir Run Run Shaw Hospital, School of Medicine, Zhejiang University | | China | | Local investigator |
| Tianzhao |  | Zheng | Hangzhou | | Sir Run Run Shaw Hospital, School of Medicine, Zhejiang University | | China | | Local investigator |
| Dachun |  | Zhou | Hangzhou | | Sir Run Run Shaw Hospital, School of Medicine, Zhejiang University | | China | | Local co-ordinator |
| Haiyan |  | Zhou | Hangzhou | | Sir Run Run Shaw Hospital, School of Medicine, Zhejiang University | | China | | Local co-ordinator |
| Ce |  | Zhou | Hangzhou | | Sir Run Run Shaw Hospital, School of Medicine, Zhejiang University | | China | | Local investigator |
| Kaizhi |  | Lu | Chongqing | | Southwest Hospital of Third Military Medical University | | China | | Local co-ordinator |
| Ting |  | Zhao | Chongqing | | Southwest Hospital of Third Military Medical University | | China | | Local investigator |
| Changlin |  | He | Hangzhou | | Affiliated Hospital of Hangzhou Normal University | | China | | Local co-ordinator |
| Hong |  | Chen | Hangzhou | | First Affiliated Hospital , School of Medicine, Zhejiang University | | China | | Local investigator |
| Shasha |  | Chen | Hangzhou | | First Affiliated Hospital , School of Medicine, Zhejiang University | | China | | Local investigator |
| Baoli |  | Cheng | Hangzhou | | First Affiliated Hospital , School of Medicine, Zhejiang University | | China | | Local investigator |
| Jie |  | He | Hangzhou | | First Affiliated Hospital , School of Medicine, Zhejiang University | | China | | Local investigator |
| Lin |  | Jin | Hangzhou | | First Affiliated Hospital , School of Medicine, Zhejiang University | | China | | Local investigator |
| Caixia |  | Li | Hangzhou | | First Affiliated Hospital , School of Medicine, Zhejiang University | | China | | Local investigator |
| Hui |  | Li | Hangzhou | | First Affiliated Hospital , School of Medicine, Zhejiang University | | China | | Local investigator |
| Yuanming |  | Pan | Hangzhou | | First Affiliated Hospital , School of Medicine, Zhejiang University | | China | | Local investigator |
| Yugang |  | Shi | Hangzhou | | First Affiliated Hospital , School of Medicine, Zhejiang University | | China | | Local investigator |
| Xiao Hong |  | Wen | Hangzhou | | First Affiliated Hospital , School of Medicine, Zhejiang University | | China | | Local co-ordinator |
| Shuijing |  | Wu | Hangzhou | | First Affiliated Hospital , School of Medicine, Zhejiang University | | China | | Local co-ordinator |
| Guohao |  | Xie | Hangzhou | | First Affiliated Hospital , School of Medicine, Zhejiang University | | China | | Local investigator |
| Kai |  | Zhang | Hangzhou | | First Affiliated Hospital , School of Medicine, Zhejiang University | | China | | Local investigator |
| Bing |  | Zhao | Hangzhou | | First Affiliated Hospital , School of Medicine, Zhejiang University | | China | | Local investigator |
| Xianfu |  | Lu | Hefei | | First Affiliated Hospital of Anhui Medical University | | China | | Local co-ordinator |
| Feifei |  | Chen | Bengbu | | First Affiliated Hospital of Bengbu Medical College | | China | | Local investigator |
| Qisheng |  | Liang | Bengbu | | First Affiliated Hospital of Bengbu Medical College | | China | | Local co-ordinator |
| Xuewu |  | Lin | Bengbu | | First Affiliated Hospital of Bengbu Medical College | | China | | Local investigator |
| Yunzhi |  | Ling | Bengbu | | First Affiliated Hospital of Bengbu Medical College | | China | | Local investigator |
| Gang |  | Liu | Bengbu | | First Affiliated Hospital of Bengbu Medical College | | China | | Local investigator |
| Jing |  | Tao | Bengbu | | First Affiliated Hospital of Bengbu Medical College | | China | | Local investigator |
| Lu |  | Yang | Bengbu | | First Affiliated Hospital of Bengbu Medical College | | China | | Local investigator |
| Jialong |  | Zhou | Bengbu | | First Affiliated Hospital of Bengbu Medical College | | China | | Local investigator |
| Fumei |  | Chen | Nanchang | | First Affiliated Hospital of Nanchang University | | China | | Local investigator |
| Yunlin |  | Feng | Nanchang | | First Affiliated Hospital of Nanchang University | | China | | Local investigator |
| Benchao |  | Hou | Nanchang | | First Affiliated Hospital of Nanchang University | | China | | Local investigator |
| Jiamei |  | Lin | Nanchang | | First Affiliated Hospital of Nanchang University | | China | | Local investigator |
| Mei |  | Liu | Nanchang | | First Affiliated Hospital of Nanchang University | | China | | Local investigator |
| Foquan |  | Luo | Nanchang | | First Affiliated Hospital of Nanchang University | | China | | Local co-ordinator |
| Xiaoyun |  | Shi | Nanchang | | First Affiliated Hospital of Nanchang University | | China | | Local investigator |
| Yingfen |  | Xiong | Nanchang | | First Affiliated Hospital of Nanchang University | | China | | Local investigator |
| Lin |  | Xu | Nanchang | | First Affiliated Hospital of Nanchang University | | China | | Local investigator |
| Shuangjia |  | Yang | Nanchang | | First Affiliated Hospital of Nanchang University | | China | | Local investigator |
| Qin |  | Zhang | Nanchang | | First Affiliated Hospital of Nanchang University | | China | | Local investigator |
| Huaigen |  | Zhang | Nanchang | | First Affiliated Hospital of Nanchang University | | China | | Local investigator |
| Weihong |  | Zhao | Nanchang | | First Affiliated Hospital of Nanchang University | | China | | Local investigator |
| Weilu |  | Zhao | Nanchang | | First Affiliated Hospital of Nanchang University | | China | | Local investigator |
| Yun, |  | Bai | Wenzhou | | First Affiliated Hospital of Wenzhou Medical University | | China | | Local investigator |
| Linbi |  | Chen | Wenzhou | | First Affiliated Hospital of Wenzhou Medical University | | China | | Local investigator |
| Sijia |  | Chen | Wenzhou | | First Affiliated Hospital of Wenzhou Medical University | | China | | Local investigator |
| Qinxue |  | Dai | Wenzhou | | First Affiliated Hospital of Wenzhou Medical University | | China | | Local investigator |
| Wujun |  | Geng | Wenzhou | | First Affiliated Hospital of Wenzhou Medical University | | China | | Local investigator |
| Kunyuan |  | Han | Wenzhou | | First Affiliated Hospital of Wenzhou Medical University | | China | | Local investigator |
| Xin |  | He | Wenzhou | | First Affiliated Hospital of Wenzhou Medical University | | China | | Local investigator |
| Luping |  | Huang | Wenzhou | | First Affiliated Hospital of Wenzhou Medical University | | China | | Local investigator |
| Binbin |  | Ji | Wenzhou | | First Affiliated Hospital of Wenzhou Medical University | | China | | Local investigator |
| Danyun |  | Jia | Wenzhou | | First Affiliated Hospital of Wenzhou Medical University | | China | | Local investigator |
| Shenhui |  | Jin | Wenzhou | | First Affiliated Hospital of Wenzhou Medical University | | China | | Local investigator |
| Qianjun |  | Li | Wenzhou | | First Affiliated Hospital of Wenzhou Medical University | | China | | Local investigator |
| Dongdong |  | Liang | Wenzhou | | First Affiliated Hospital of Wenzhou Medical University | | China | | Local investigator |
| Shan |  | Luo | Wenzhou | | First Affiliated Hospital of Wenzhou Medical University | | China | | Local investigator |
| Lulu |  | Lwang | Wenzhou | | First Affiliated Hospital of Wenzhou Medical University | | China | | Local investigator |
| Yunchang |  | Mo | Wenzhou | | First Affiliated Hospital of Wenzhou Medical University | | China | | Local investigator |
| Yuanyuan |  | Pan | Wenzhou | | First Affiliated Hospital of Wenzhou Medical University | | China | | Local investigator |
| Xinyu |  | Qi | Wenzhou | | First Affiliated Hospital of Wenzhou Medical University | | China | | Local investigator |
| Meizi |  | Qian | Wenzhou | | First Affiliated Hospital of Wenzhou Medical University | | China | | Local investigator |
| Jinling |  | Qin | Wenzhou | | First Affiliated Hospital of Wenzhou Medical University | | China | | Local investigator |
| Yelong |  | Ren | Wenzhou | | First Affiliated Hospital of Wenzhou Medical University | | China | | Local investigator |
| Yiyi |  | Shi | Wenzhou | | First Affiliated Hospital of Wenzhou Medical University | | China | | Local investigator |
| Junlu |  | Wang | Wenzhou | | First Affiliated Hospital of Wenzhou Medical University | | China | | Local co-ordinator |
| Junkai |  | Wang | Wenzhou | | First Affiliated Hospital of Wenzhou Medical University | | China | | Local investigator |
| Leilei |  | Wang | Wenzhou | | First Affiliated Hospital of Wenzhou Medical University | | China | | Local investigator |
| Junjie |  | Xie | Wenzhou | | First Affiliated Hospital of Wenzhou Medical University | | China | | Local investigator |
| Yixiu |  | Yan | Wenzhou | | First Affiliated Hospital of Wenzhou Medical University | | China | | Local investigator |
| Yurui |  | Yao | Wenzhou | | First Affiliated Hospital of Wenzhou Medical University | | China | | Local investigator |
| Mingxiao |  | Zhang | Wenzhou | | First Affiliated Hospital of Wenzhou Medical University | | China | | Local investigator |
| Jiashi |  | Zhao | Wenzhou | | First Affiliated Hospital of Wenzhou Medical University | | China | | Local investigator |
| Xiuxiu |  | Zhuang | Wenzhou | | First Affiliated Hospital of Wenzhou Medical University | | China | | Local investigator |
| Yanqiu |  | Ai | Zhengzhou | | First Affiliated Hospital of Zhengzhou University | | China | | Local co-ordinator |
| Fang |  | Du | Zhengzhou | | First Affiliated Hospital of Zhengzhou University | | China | | Local investigator |
| Long |  | He | Zhengzhou | | First Affiliated Hospital of Zhengzhou University | | China | | Local investigator |
| Ledan |  | Huang | Zhengzhou | | First Affiliated Hospital of Zhengzhou University | | China | | Local investigator |
| Zhisong |  | Li | Zhengzhou | | First Affiliated Hospital of Zhengzhou University | | China | | Local investigator |
| Huijuan |  | Li | Zhengzhou | | First Affiliated Hospital of Zhengzhou University | | China | | Local investigator |
| Yetong |  | Li | Zhengzhou | | First Affiliated Hospital of Zhengzhou University | | China | | Local investigator |
| Liwei |  | Li | Zhengzhou | | First Affiliated Hospital of Zhengzhou University | | China | | Local investigator |
| Su |  | Meng | Zhengzhou | | First Affiliated Hospital of Zhengzhou University | | China | | Local investigator |
| Yazhuo |  | Yuan | Zhengzhou | | First Affiliated Hospital of Zhengzhou University | | China | | Local investigator |
| Enman |  | Zhang | Zhengzhou | | First Affiliated Hospital of Zhengzhou University | | China | | Local investigator |
| Jie |  | Zhang | Zhengzhou | | First Affiliated Hospital of Zhengzhou University | | China | | Local investigator |
| Shuna |  | Zhao | Zhengzhou | | First Affiliated Hospital of Zhengzhou University | | China | | Local investigator |
| Zhenrong |  | Ji | Taichung | | First University Hospital of China Medical University | | China | | Local investigator |
| Ling |  | Pei | Taichung | | First University Hospital of China Medical University | | China | | Local co-ordinator |
| Li |  | Wang | Taichung | | First University Hospital of China Medical University | | China | | Local investigator |
| Chen |  | Chen | Tianjin | | General Hospital of Tianjin Medical University | | China | | Local investigator |
| Beibei |  | Dong | Tianjin | | General Hospital of Tianjin Medical University | | China | | Local investigator |
| Jing |  | Li | Tianjin | | General Hospital of Tianjin Medical University | | China | | Local investigator |
| Ziqiang |  | Miao | Tianjin | | General Hospital of Tianjin Medical University | | China | | Local investigator |
| Hongying |  | Mu | Tianjin | | General Hospital of Tianjin Medical University | | China | | Local investigator |
| Chao |  | Qin | Tianjin | | General Hospital of Tianjin Medical University | | China | | Local investigator |
| Lin |  | Su | Tianjin | | General Hospital of Tianjin Medical University | | China | | Local investigator |
| Zhiting |  | Wen | Tianjin | | General Hospital of Tianjin Medical University | | China | | Local investigator |
| Keliang |  | Xie | Tianjin | | General Hospital of Tianjin Medical University | | China | | Local co-ordinator |
| Yonghao |  | Yu | Tianjin | | General Hospital of Tianjin Medical University | | China | | Local co-ordinator |
| Fang |  | Yuan | Tianjin | | General Hospital of Tianjin Medical University | | China | | Local investigator |
| Xianwen |  | Hu | Hefei | | The Second Affiliated Hospital of Anhui Medical University | | China | | Local investigator |
| Ye |  | Zhang | Hefei | | The Second Affiliated Hospital of Anhui Medical University | | China | | Local co-ordinator |
| Wangpin |  | Xiao | [Jiaxing](https://en.wikipedia.org/wiki/Jiaxing) | | The Second Affiliated Hospital of Jiaxing College | | China | | Local co-ordinator |
| Zhipeng |  | Zhu | [Jiaxing](https://en.wikipedia.org/wiki/Jiaxing) | | The Second Affiliated Hospital of Jiaxing College | | China | | Local investigator |
| Qingqing |  | Dai | Nanchang | | The Second Affiliated Hospital of Nanchang University | | China | | Local investigator |
| Kaiwen |  | Fu | Nanchang | | The Second Affiliated Hospital of Nanchang University | | China | | Local investigator |
| Rong |  | Hu | Nanchang | | The Second Affiliated Hospital of Nanchang University | | China | | Local investigator |
| Xiaolan |  | Hu | Nanchang | | The Second Affiliated Hospital of Nanchang University | | China | | Local investigator |
| Song |  | Huang | Nanchang | | The Second Affiliated Hospital of Nanchang University | | China | | Local investigator |
| Yaqi |  | Li | Nanchang | | The Second Affiliated Hospital of Nanchang University | | China | | Local investigator |
| Yingping |  | Liang | Nanchang | | The Second Affiliated Hospital of Nanchang University | | China | | Local investigator |
| Shuchun |  | Yu | Nanchang | | The Second Affiliated Hospital of Nanchang University | | China | | Local co-ordinator |
| Zheng |  | Guo | Taiyuan | | The Second Affiliated Hospital of Shanxi Medical University | | China | | Local co-ordinator |
| Yan |  | Jing | Taiyuan | | The Second Affiliated Hospital of Shanxi Medical University | | China | | Local investigator |
| Na |  | Tang | Taiyuan | | The Second Affiliated Hospital of Shanxi Medical University | | China | | Local investigator |
| Jie |  | Wu | Taiyuan | | The Second Affiliated Hospital of Shanxi Medical University | | China | | Local investigator |
| Dajiang |  | Yuan | Taiyuan | | The Second Affiliated Hospital of Shanxi Medical University | | China | | Local co-ordinator |
| Ruilin |  | Zhang | Taiyuan | | The Second Affiliated Hospital of Shanxi Medical University | | China | | Local investigator |
| Xiaoying |  | Zhao | Taiyuan | | The Second Affiliated Hospital of Shanxi Medical University | | China | | Local investigator |
| Yuhong |  | Li | Shaoxing | | Shaoxing Hospital of Zhejiang University | | China | | Local co-ordinator |
| Hui-Ping |  | Bai | Shijiazhuang | | Third Hospital of Hebei Medical University | | China | | Local investigator |
| Chun-Xiao |  | Liu | Shijiazhuang | | Third Hospital of Hebei Medical University | | China | | Local investigator |
| Fei-Fei |  | Liu | Shijiazhuang | | Third Hospital of Hebei Medical University | | China | | Local investigator |
| Wei |  | Ren | Shijiazhuang | | Third Hospital of Hebei Medical University | | China | | Local investigator |
| Xiu-Li |  | Wang | Shijiazhuang | | Third Hospital of Hebei Medical University | | China | | Local co-ordinator |
| Guan-Jie |  | Xu | Shijiazhuang | | Third Hospital of Hebei Medical University | | China | | Local investigator |
| Na |  | Hu | Changsha | | Third Xiangya Hospital of Central South University | | China | | Local investigator |
| Bo |  | Li | Changsha | | Third Xiangya Hospital of Central South University | | China | | Local investigator |
| Yangwen |  | Ou | Changsha | | Third Xiangya Hospital of Central South University | | China | | Local co-ordinator |
| Yongzhong |  | Tang | Changsha | | Third Xiangya Hospital of Central South University | | China | | Local investigator |
| Shanglong |  | Yao | Wuhan | | Union Hospital, Tongji Medical College, Huazhong University of Science and Technology | | China | | Local co-ordinator |
| Shihai |  | Zhang | Wuhan | | Union Hospital, Tongji Medical College, Huazhong University of Science and Technology | | China | | Local investigator |
| Cui-Cui |  | Kong | Beijing | | Xuan Wu Hospital, Capital Medical University | | China | | Local investigator |
| Bei |  | Liu | Beijing | | Xuan Wu Hospital, Capital Medical University | | China | | Local investigator |
| Tianlong |  | Wang | Beijing | | Xuan Wu Hospital, Capital Medical University | | China | | Local co-ordinator |
| Wei |  | Xiao | Beijing | | Xuan Wu Hospital, Capital Medical University | | China | | Local investigator |
| Bo |  | Lu | Hangzhou | | Zhejiang Hospital | | China | | Local investigator |
| Yanfei |  | Xia | Hangzhou | | Zhejiang Hospital | | China | | Local co-ordinator |
| Jiali |  | Zhou | Hangzhou | | Zhejiang Hospital | | China | | Local investigator |
| Fang |  | Cai | Hangzhou | | Zhejiang Provincial People’s Hospital | | China | | Local investigator |
| Pushan |  | Chen | Hangzhou | | Zhejiang Provincial People’s Hospital | | China | | Local investigator |
| Shuangfei |  | Hu | Hangzhou | | Zhejiang Provincial People’s Hospital | | China | | Local co-ordinator |
| Hongfa |  | Wang | Hangzhou | | Zhejiang Provincial People’s Hospital | | China | | Local investigator |
| Jie |  | Wu | Hangzhou | | Zhejiang Provincial People’s Hospital | | China | | Local investigator |
| Qiong |  | Xu | Hangzhou | | Zhejiang Provincial People’s Hospital | | China | | Local investigator |
| Liu |  | Hu | Nanjing | | Zhongda Hospital, Southeast University | | China | | Local investigator |
| Liang |  | Jing | Nanjing | | Zhongda Hospital, Southeast University | | China | | Local investigator |
| Jing |  | Li | Nanjing | | Zhongda Hospital, Southeast University | | China | | Local investigator |
| Bin |  | Li | Nanjing | | Zhongda Hospital, Southeast University | | China | | Local investigator |
| Qiang |  | Liu | Nanjing | | Zhongda Hospital, Southeast University | | China | | Local investigator |
| Yuejiang |  | Liu | Nanjing | | Zhongda Hospital, Southeast University | | China | | Local investigator |
| Xinjian |  | Lu | Nanjing | | Zhongda Hospital, Southeast University | | China | | Local investigator |
| Zhen | Dan | Peng | Nanjing | | Zhongda Hospital, Southeast University | | China | | Local investigator |
| Xiaodong |  | Qiu | Nanjing | | Zhongda Hospital, Southeast University | | China | | Local investigator |
| Quan |  | Ren | Nanjing | | Zhongda Hospital, Southeast University | | China | | Local investigator |
| Youliang |  | Tong | Nanjing | | Zhongda Hospital, Southeast University | | China | | Local investigator |
| Zhen |  | Wang | Nanjing | | Zhongda Hospital, Southeast University | | China | | Local investigator |
| Jin |  | Wang | Nanjing | | Zhongda Hospital, Southeast University | | China | | Local investigator |
| Yazhou |  | Wen | Nanjing | | Zhongda Hospital, Southeast University | | China | | Local investigator |
| Qiong |  | Wu | Nanjing | | Zhongda Hospital, Southeast University | | China | | Local investigator |
| Jiangyan |  | Xia | Nanjing | | Zhongda Hospital, Southeast University | | China | | Local investigator |
| Jue |  | Xie | Nanjing | | Zhongda Hospital, Southeast University | | China | | Local investigator |
| Xiapei |  | Xiong | Nanjing | | Zhongda Hospital, Southeast University | | China | | Local investigator |
| Shixia |  | Xu | Nanjing | | Zhongda Hospital, Southeast University | | China | | Local investigator |
| Tianqin |  | Yang | Nanjing | | Zhongda Hospital, Southeast University | | China | | Local investigator |
| Hui |  | Ye | Nanjing | | Zhongda Hospital, Southeast University | | China | | Local investigator |
| Ning |  | Yin | Nanjing | | Zhongda Hospital, Southeast University | | China | | Local co-ordinator |
| Jing |  | Yuan | Nanjing | | Zhongda Hospital, Southeast University | | China | | Local investigator |
| Qiuting |  | Zeng | Nanjing | | Zhongda Hospital, Southeast University | | China | | Local investigator |
| Baoling |  | Zhang | Nanjing | | Zhongda Hospital, Southeast University | | China | | Local investigator |
| Kang |  | Zheng | Nanjing | | Zhongda Hospital, Southeast University | | China | | Local investigator |
| Jing |  | Cang | Nanjing | | Zhongshan Hospital Fudan University | | China | | Local investigator |
| Shiyu |  | Chen | Nanjing | | Zhongshan Hospital Fudan University | | China | | Local investigator |
| Fang |  | Du | Nanjing | | Zhongshan Hospital Fudan University | | China | | Local investigator |
| Yu |  | Fan | Nanjing | | Zhongshan Hospital Fudan University | | China | | Local investigator |
| Shuying |  | Fu | Nanjing | | Zhongshan Hospital Fudan University | | China | | Local investigator |
| Xiaodong |  | Ge | Nanjing | | Zhongshan Hospital Fudan University | | China | | Local investigator |
| Baolei |  | Guo | Nanjing | | Zhongshan Hospital Fudan University | | China | | Local investigator |
| Wenhui |  | Huang | Nanjing | | Zhongshan Hospital Fudan University | | China | | Local investigator |
| Linghui |  | Jiang | Nanjing | | Zhongshan Hospital Fudan University | | China | | Local investigator |
| Xinmei |  | Jiang | Nanjing | | Zhongshan Hospital Fudan University | | China | | Local investigator |
| Lin |  | Jin | Nanjing | | Zhongshan Hospital Fudan University | | China | | Local investigator |
| Yi |  | Liu | Nanjing | | Zhongshan Hospital Fudan University | | China | | Local investigator |
| Yan |  | Pan | Nanjing | | Zhongshan Hospital Fudan University | | China | | Local investigator |
| Yun |  | Ren | Nanjing | | Zhongshan Hospital Fudan University | | China | | Local investigator |
| Qi |  | Shan | Nanjing | | Zhongshan Hospital Fudan University | | China | | Local investigator |
| Jiaxing |  | Wang | Nanjing | | Zhongshan Hospital Fudan University | | China | | Local investigator |
| Fei |  | Wang | Nanjing | | Zhongshan Hospital Fudan University | | China | | Local investigator |
| Chi |  | Wu | Nanjing | | Zhongshan Hospital Fudan University | | China | | Local investigator |
| Xiaoguang |  | Zhang | Nanjing | | Zhongshan Hospital Fudan University | | China | | Local co-ordinator |
| Ida | Cecilie | Christiansen | Aalborg | | Aalborg University Hospital | | Denmark | | Local co-ordinator |
| Simon | Nørgaard | Granum | Aalborg | | Aalborg University Hospital | | Denmark | | Local investigator |
| Bodil | Steen | Rasmussen | Aalborg | | Aalborg University Hospital | | Denmark | | Local co-ordinator |
| Morten |  | Daugaard | Aarhus | | Aarhus University Hospital, Skejby | | Denmark | | Local investigator |
| Rajiv |  | Gambhir | Aarhus | | Aarhus University Hospital, Skejby | | Denmark | | Local co-ordinator |
| Guðný | Erla | Steingrímsdóttir | København | | Bispebjerg Hospital | | Denmark | | Local co-ordinator |
| Peter |  | Jensen-Gadegaard | Hellerup | | Gentofte Hospital | | Denmark | | Local co-ordinator |
| Karsten | Skovgaard | Olsen | Glostrup | | Glostrup Hospital | | Denmark | | Local co-ordinator |
| Hanna |  | Siegel | Glostrup | | Glostrup Hospital | | Denmark | | Local investigator |
| Katrine | Zwicky | Eskildsen | Herlev | | Herlev Hospital | | Denmark | | Local investigator |
| Mona | Ring | Gätke | Herlev | | Herlev Hospital | | Denmark | | Local co-ordinator |
| Ida |  | Wibrandt | Holbæk | | Holbæk Sygehus | | Denmark | | Local co-ordinator |
| Simon | Bisgaard | Heintzelmann | Horsens | | Horsens Sygehus | | Denmark | | Local co-ordinator |
| Kai | Henrik Wiborg | Lange | Hillerød | | Nordsjællands Hospital | | Denmark | | Local co-ordinator |
| Rune | Sarauw | Lundsgaard | Hillerød | | Nordsjællands Hospital | | Denmark | | Local investigator |
| Louise |  | Amstrup-Hansen | Odense | | Odense Universitets Hospital | | Denmark | | Local investigator |
| Claus |  | Hovendal | Odense | | Odense Universitets Hospital | | Denmark | | Local co-ordinator |
| Michael |  | Larsen | Odense | | Odense Universitets Hospital | | Denmark | | Local investigator |
| Mette |  | Lenstrup | Odense | | Odense Universitets Hospital | | Denmark | | Local investigator |
| Tina |  | Kobborg | Silkeborg | | Regionshospitalet Silkeborg | | Denmark | | Local investigator |
| Jens | Rolighed | Larsen | Silkeborg | | Regionshospitalet Silkeborg | | Denmark | | Local co-ordinator |
| Anette | Barbre | Pedersen | Silkeborg | | Regionshospitalet Silkeborg | | Denmark | | Local investigator |
| Jens | Rolighed | Larsen | Viborg | | Regionshospitalet Viborg | | Denmark | | Local co-ordinator |
| Søren | Hübertz | Smith | Viborg | | Regionshospitalet Viborg | | Denmark | | Local investigator |
| Rebecca | Monett | Oestervig | København | | Rigshospitalet, HOC | | Denmark | | Local investigator |
| Lars |  | Rasmussen | København | | Rigshospitalet, HOC | | Denmark | | Local co-ordinator |
| Arash |  | Afshari | København | | Rigshospitalet, JMC | | Denmark | | Local co-ordinator |
| Cheme |  | Andersen | København | | Rigshospitalet, JMC | | Denmark | | Local investigator |
| Kim |  | Ekelund | København | | Rigshospitalet, JMC | | Denmark | | Local investigator |
| Erik | Lilja | Secher | København | | Rigshospitalet, JMC | | Denmark | | Local investigator |
| Birgitte |  | Brandsborg | Aarhus | | Tage Hansen Gade, Aarhus | | Denmark | | Local co-ordinator |
| Helene |  | Beloeil | Rennes | | CHU de Rennes | | France | | Local co-ordinator |
| Sigismond |  | Lasocki | Angers | | CHU d'Angers | | France | | Local co-ordinator |
| Aurélien |  | Venara | Angers | | CHU d'Angers | | France | | Local co-ordinator |
| Matthieu |  | Biais | Bordeaux | | CHU de Bordeaux, Hôpital Pellegrin, Centre François Xavier Michelet | | France | | Local co-ordinator |
| Alexandre |  | Ouattara | Bordeaux | | CHU de Bordeaux, Hôpital Pellegrin, Hôpital du Haut Lévêque | | France | | Local co-ordinator |
| Marlene |  | Sineus | Bordeaux | | CHU de Bordeaux, Hôpital Pellegrin, Hôpital du Haut Lévêque | | France | | Local investigator |
| Serge |  | Molliex | Saint-Etienne | | CHU de Saint-Etienne | | France | | Local co-ordinator |
| Marie | Lim | Legouge | Paris | | CHU-Hospital Saint Louis, Paris | | France | | Local co-ordinator |
| Florent |  | Wallet | Lyon | | CHU-Lyon Sud, Lyon | | France | | Local co-ordinator |
| Antoine |  | Tesniere | Paris | | Hôpital Cochin, APHP, Paris | | France | | Local co-ordinator |
| Christophe |  | Gaudin | Nantes | | Hôpital de Nantes | | France | | Local investigator |
| Paul |  | Lehur | Nantes | | Hôpital de Nantes | | France | | Local co-ordinator |
| Emma |  | Forsans | Paris | | Hôpital d'instruction des Armées (HIA) du Val-de-Grace | | France | | Local investigator |
| Stéphane |  | de Rudnicki | Paris | | Hôpital d'instruction des Armées (HIA) du Val-de-Grace | | France | | Local co-ordinator |
| Valerie |  | Serra Maudet | Le Mans | | Hopital Le Mans | | France | | Local co-ordinator |
| Didier |  | Mutter | Strasbourg | | Nouvel Hôpital Civil, Strasbourg University Hospital | | France | | Local co-ordinator |
| Ghassan |  | Sojod | Strasbourg | | Nouvel Hôpital Civil, Strasbourg University Hospital | | France | | Local investigator |
| Mehdi |  | Ouaissi | Marseille | | Timone Hospital, Marseille | | France | | Local co-ordinator |
| Jean-Marc |  | Regimbeau | Amiens | | University Hospital of Amiens | | France | | Local co-ordinator |
| Emmanuel |  | Futier | Clermont-Ferrand | | University Hospital of Clermont-Ferrand | | France | | Local co-ordinator |
| Jacques |  | Desbordes | Lille | | University Hospital of Lille, Calmette Hospital | | France | | Local co-ordinator |
| Nicolas |  | Comptaer | Lille | | University Hospital of Lille, Huriez Hospital | | France | | Local investigator |
| Diae |  | el Manser | Lille | | University Hospital of Lille, Huriez Hospital | | France | | Local investigator |
| Sabine |  | Ethgen | Lille | | University Hospital of Lille, Huriez Hospital | | France | | Local investigator |
| Gilles |  | Lebuffe | Lille | | University Hospital of Lille, Huriez Hospital | | France | | Local co-ordinator |
| Patrick |  | Auer | Bad Abbach | | Asklepios Klinikum Bad Abbach | | Germany | | Local co-ordinator |
| Christine |  | Härtl | Bad Abbach | | Asklepios Klinikum Bad Abbach | | Germany | | Local investigator |
| Maria |  | Deja | Berlin | | Charite Berlin Campus Benjamin Franklin | | Germany | | Local co-ordinator |
| Kirill |  | Legashov | Berlin | | Charite Berlin Campus Benjamin Franklin | | Germany | | Local co-ordinator |
| Susanne |  | Sonnemann | Berlin | | Charite Berlin Campus Benjamin Franklin | | Germany | | Local investigator |
| Carola |  | Wiegand-Loehnert | Berlin | | Charite Berlin Campus Benjamin Franklin | | Germany | | Local co-ordinator |
| Elke |  | Falk | Berlin | | Charité Universitätsklinik Berlin, Campus Charité Mitte | | Germany | | Local investigator |
| Marit |  | Habicher | Berlin | | Charité Universitätsklinik Berlin, Campus Charité Mitte | | Germany | | Local co-ordinator |
| Stefan |  | Angermair | Berlin | | Charité Universitätsklinik Berlin, Campus Virchow Klinikum | | Germany | | Local investigator |
| Beatrix |  | Laetsch | Berlin | | Charité Universitätsklinik Berlin, Campus Virchow Klinikum | | Germany | | Local investigator |
| Katrin |  | Schmidt | Berlin | | Charité Universitätsklinik Berlin, Campus Virchow Klinikum | | Germany | | Local investigator |
| Susanne |  | Sonnemann | Berlin | | Charité Universitätsklinik Berlin, Campus Virchow Klinikum | | Germany | | Local investigator |
| Christian |  | Von Heymann | Berlin | | Charité Universitätsklinik Berlin, Campus Virchow Klinikum | | Germany | | Local co-ordinator |
| Axel |  | Ramminger | Berlin | | Evangelische Elisabeth Klinik | | Germany | | Local co-ordinator |
| Florian |  | Jelschen | Oldenburg | | Klinikum Oldenburg | | Germany | | Local co-ordinator |
| Svenja |  | Pabel | Oldenburg | | Klinikum Oldenburg | | Germany | | Local investigator |
| Andreas |  | Weyland | Oldenburg | | Klinikum Oldenburg | | Germany | | Local co-ordinator |
| Elke |  | Czeslick | Leipzig | | Klinikum St. Georg | | Germany | | Local investigator |
| Jochen |  | Gille | Leipzig | | Klinikum St. Georg | | Germany | | Local investigator |
| Michael |  | Malcharek | Leipzig | | Klinikum St. Georg | | Germany | | Local investigator |
| Armin |  | Sablotzki | Leipzig | | Klinikum St. Georg | | Germany | | Local co-ordinator |
| Katharina |  | Lueke | Freiburg im Breisgau | | Lorettokrankenhaus | | Germany | | Local investigator |
| Peter |  | Wetzel | Freiburg im Breisgau | | Lorettokrankenhaus | | Germany | | Local co-ordinator |
| Joerg |  | Weimann | Berlin | | Sankt Gertrauden-Krankenhaus | | Germany | | Local co-ordinator |
| Franz-Peter |  | Lenhart | München | | Schön Klinik München-Harlaching | | Germany | | Local investigator |
| Florian |  | Reichle | München | | Schön Klinik München-Harlaching | | Germany | | Local co-ordinator |
| Frederike |  | Schirmer | München | | Schön Klinik München-Harlaching | | Germany | | Local investigator |
| Michael |  | Hüppe | Lübeck | | Universitätsklinikum Schleswig-Holstein, Campus Lübeck | | Germany | | Local investigator |
| Karl |  | Klotz | Lübeck | | Universitätsklinikum Schleswig-Holstein, Campus Lübeck | | Germany | | Local investigator |
| Carla |  | Nau | Lübeck | | Universitätsklinikum Schleswig-Holstein, Campus Lübeck | | Germany | | Local co-ordinator |
| Julika |  | Schön | Lübeck | | Universitätsklinikum Schleswig-Holstein, Campus Lübeck | | Germany | | Local investigator |
| Thomas |  | Mencke | Rostock | | Universitätsmedizin Rostock | | Germany | | Local investigator |
| Christina |  | Wasmund | Rostock | | Universitätsmedizin Rostock | | Germany | | Local co-ordinator |
| Carla |  | Bankewitz | Bonn | | University Hospital Bonn | | Germany | | Local investigator |
| Georg |  | Baumgarten | Bonn | | University Hospital Bonn | | Germany | | Local investigator |
| Andreas |  | Fleischer | Bonn | | University Hospital Bonn | | Germany | | Local investigator |
| Vera |  | Guttenthaler | Bonn | | University Hospital Bonn | | Germany | | Local investigator |
| Yvonne |  | Hack | Bonn | | University Hospital Bonn | | Germany | | Local investigator |
| Andreas |  | Hoeft | Bonn | | University Hospital Bonn | | Germany | | Local investigator |
| Katharina |  | Kirchgaessner | Bonn | | University Hospital Bonn | | Germany | | Local investigator |
| Olja |  | Männer | Bonn | | University Hospital Bonn | | Germany | | Local investigator |
| Marlen |  | Schurig-Urbaniak | Bonn | | University Hospital Bonn | | Germany | | Local investigator |
| Rafael |  | Struck | Bonn | | University Hospital Bonn | | Germany | | Local investigator |
| Rebekka |  | van Zyl | Bonn | | University Hospital Bonn | | Germany | | Local investigator |
| Maria |  | Wittmann | Bonn | | University Hospital Bonn | | Germany | | Local co-ordinator |
| Ulrich |  | Goebel | Freiburg | | University Medical Centre Freiburg | | Germany | | Local co-ordinator |
| Sarah |  | Harris | Freiburg | | University Medical Centre Freiburg | | Germany | | Local investigator |
| Siegfried |  | Veit | Berlin | | Vivantes Klinikum Friedrichshain | | Germany | | Local co-ordinator |
| Evangelia |  | Andreadaki | Athens | | 251 General Airforce Hospital, Athens | | Greece | | Local co-ordinator |
| Flora |  | Souri | Athens | | 251 General Airforce Hospital, Athens | | Greece | | Local investigator |
| Ioannis |  | Katsiadramis | Thessaloniki | | 424 Army Hospital, Thessaloniki | | Greece | | Local co-ordinator |
| Anthi |  | Skoufi | Thessaloniki | | 424 Army Hospital, Thessaloniki | | Greece | | Local investigator |
| Maria |  | Vasileiou | Thessaloniki | | 424 Army Hospital, Thessaloniki | | Greece | | Local investigator |
| Eleni |  | Aimoniotou-Georgiou | Thessaloniki | | Agios Dimitrios General Hospital of Thessaloniki | | Greece | | Local co-ordinator |
| Anastasios |  | Katsourakis | Thessaloniki | | Agios Dimitrios General Hospital of Thessaloniki | | Greece | | Local investigator |
| Fotini |  | Veroniki | Thessaloniki | | Agios Dimitrios General Hospital of Thessaloniki | | Greece | | Local investigator |
| Glyceria |  | Vlachogianni | Thessaloniki | | Agios Dimitrios General Hospital of Thessaloniki | | Greece | | Local investigator |
| Konstantina |  | Petra | Thessaloniki | | Agios Pavlos General Hospital, Thessaloniki | | Greece | | Local co-ordinator |
| Dimitra |  | Chlorou | Thessaloniki | | Ahepa University Hospital, Thessaloniki | | Greece | | Local investigator |
| Eirini |  | Oloktsidou | Thessaloniki | | Ahepa University Hospital, Thessaloniki | | Greece | | Local investigator |
| Vasileios |  | Ourailoglou | Thessaloniki | | Ahepa University Hospital, Thessaloniki | | Greece | | Local investigator |
| Konstantinos |  | Papapostolou | Thessaloniki | | Ahepa University Hospital, Thessaloniki | | Greece | | Local investigator |
| Georgia |  | Tsaousi | Thessaloniki | | Ahepa University Hospital, Thessaloniki | | Greece | | Local co-ordinator |
| Panagoula |  | Daikou | Athens | | Amalia Flemig General Hospital of Athens | | Greece | | Local investigator |
| Georgia |  | Dedemadi | Athens | | Amalia Flemig General Hospital of Athens | | Greece | | Local co-ordinator |
| Ioannis |  | Kalaitzopoulos | Athens | | Amalia Flemig General Hospital of Athens | | Greece | | Local investigator |
| Christos |  | Loumpias | Athens | | Amalia Flemig General Hospital of Athens | | Greece | | Local investigator |
| Sotirios |  | Bristogiannis | Athens | | Aretaieio University Hospital of Athens | | Greece | | Local investigator |
| Nikolaos |  | Dafnios | Athens | | Aretaieio University Hospital of Athens | | Greece | | Local investigator |
| Georgios |  | Gkiokas | Athens | | Aretaieio University Hospital of Athens | | Greece | | Local co-ordinator |
| Elissaios |  | Kontis | Athens | | Aretaieio University Hospital of Athens | | Greece | | Local investigator |
| Dimitra |  | Kozompoli | Athens | | Aretaieio University Hospital of Athens | | Greece | | Local investigator |
| Aspasia |  | Papailia | Athens | | Aretaieio University Hospital of Athens | | Greece | | Local investigator |
| Theodosios |  | Theodosopoulos | Athens | | Aretaieio University Hospital of Athens | | Greece | | Local investigator |
| Christol |  | Bizios | Athens | | Asklepeion General Hospital of Voula, Athens | | Greece | | Local investigator |
| Anastasia |  | Koutsikou | Athens | | Asklepeion General Hospital of Voula, Athens | | Greece | | Local co-ordinator |
| Aleaxandra |  | Moustaka | Athens | | Asklepeion General Hospital of Voula, Athens | | Greece | | Local investigator |
| Ioannis |  | Plaitakis | Athens | | Asklepeion General Hospital of Voula, Athens | | Greece | | Local investigator |
| Apostolos |  | Armaganidis | Athens | | Attikon University Hospital of Athens | | Greece | | Local investigator |
| Theodora |  | Christodoulopoulou | Athens | | Attikon University Hospital of Athens | | Greece | | Local investigator |
| Mihail |  | Lignos | Athens | | Attikon University Hospital of Athens | | Greece | | Local investigator |
| Maria |  | Theodorakopoulou | Athens | | Attikon University Hospital of Athens | | Greece | | Local co-ordinator |
| Andreas |  | Asimakos | Athens | | Evangelismos General Hospital of Athens | | Greece | | Local investigator |
| Eleni |  | Ischaki | Athens | | Evangelismos General Hospital of Athens | | Greece | | Local co-ordinator |
| Angeliki |  | Tsagkaraki | Athens | | Evangelismos General Hospital of Athens | | Greece | | Local investigator |
| Spyros |  | Zakynthinos | Athens | | Evangelismos General Hospital of Athens | | Greece | | Local co-ordinator |
| Eleni |  | Antoniadou | Athens | | G.Gennimatas General Hospital | | Greece | | Local co-ordinator |
| Ioannis |  | Koutelidakis | Athens | | G.Gennimatas General Hospital | | Greece | | Local investigator |
| Dimitrios |  | Lathyris | Athens | | G.Gennimatas General Hospital | | Greece | | Local investigator |
| Irene |  | Pozidou | Athens | | G.Gennimatas General Hospital | | Greece | | Local investigator |
| Nikolaos |  | Voloudakis | Athens | | G.Gennimatas General Hospital | | Greece | | Local investigator |
| Maria |  | Dalamagka | Edessa | | General Hospital of Edessa | | Greece | | Local investigator |
| Elena |  | Gkonezou | Edessa | | General Hospital of Edessa | | Greece | | Local co-ordinator |
| Christos |  | Chronis | Katerini | | General Hospital of Katerini | | Greece | | Local investigator |
| Dimitra |  | Manolakaki | Katerini | | General Hospital of Katerini | | Greece | | Local investigator |
| Dimitris |  | Mosxogiannidis | Katerini | | General Hospital of Katerini | | Greece | | Local investigator |
| Tatiana |  | Slepova | Katerini | | General Hospital of Katerini | | Greece | | Local co-ordinator |
| Isaia–sissy |  | Tsakiridou | Katerini | | General Hospital of Katerini | | Greece | | Local investigator |
| Claire Lampiri |  | Lampiri | Kavala | | General Hospital of Kavala | | Greece | | Local co-ordinator |
| Anastasia Vachlioti |  | Vachlioti | Kavala | | General Hospital of Kavala | | Greece | | Local investigator |
| Christos Panagiotakis |  | Panagiotakis | Lamia | | General Hospital of Lamia | | Greece | | Local investigator |
| Dimitrios Sfyras |  | Sfyras | Lamia | | General Hospital of Lamia | | Greece | | Local investigator |
| Fotios Tsimpoukas |  | Tsimpoukas | Lamia | | General Hospital of Lamia | | Greece | | Local co-ordinator |
| Athanasia |  | Tsirogianni | Lamia | | General Hospital of Lamia | | Greece | | Local investigator |
| Elena |  | Axioti | Patras | | General Hospital of Patra "Aghios Andreas" | | Greece | | Local investigator |
| Andreas |  | Filippopoulos | Patras | | General Hospital of Patra "Aghios Andreas" | | Greece | | Local investigator |
| Elli |  | Kalliafa | Patras | | General Hospital of Patra "Aghios Andreas" | | Greece | | Local investigator |
| George |  | Kassavetis | Patras | | General Hospital of Patra "Aghios Andreas" | | Greece | | Local investigator |
| Petros |  | Katralis | Patras | | General Hospital of Patra "Aghios Andreas" | | Greece | | Local investigator |
| Ioannis |  | Komnos | Patras | | General Hospital of Patra "Aghios Andreas" | | Greece | | Local investigator |
| Georgios |  | Pilichos | Patras | | General Hospital of Patra "Aghios Andreas" | | Greece | | Local investigator |
| Ifigenia |  | Ravani | Patras | | General Hospital of Patra "Aghios Andreas" | | Greece | | Local co-ordinator |
| Antonis |  | Totis | Patras | | General Hospital of Patra "Aghios Andreas" | | Greece | | Local investigator |
| Eymorfia |  | Apagaki | Trikala | | General Hospital of Trikala | | Greece | | Local investigator |
| Andromachi |  | Efthymiadi | Trikala | | General Hospital of Trikala | | Greece | | Local investigator |
| Nikolaos |  | Kampagiannis | Trikala | | General Hospital of Trikala | | Greece | | Local investigator |
| Theoniki |  | Paraforou | Trikala | | General Hospital of Trikala | | Greece | | Local co-ordinator |
| Agoritsa |  | Tsioka | Trikala | | General Hospital of Trikala | | Greece | | Local investigator |
| Georgios |  | Georgiou | Xanthi | | General Hospital Of Xanthi | | Greece | | Local investigator |
| Aristeidis |  | Vakalos | Xanthi | | General Hospital Of Xanthi | | Greece | | Local co-ordinator |
| Aggeliki |  | Bairaktari | Athens | | General Oncology Hospital of Kifissia "Agii Anargyri" | | Greece | | Local investigator |
| Efthimios |  | Charitos | Athens | | General Oncology Hospital of Kifissia "Agii Anargyri" | | Greece | | Local investigator |
| George |  | Markou | Athens | | General Oncology Hospital of Kifissia "Agii Anargyri" | | Greece | | Local investigator |
| Panagiota |  | Niforopoulou | Athens | | General Oncology Hospital of Kifissia "Agii Anargyri" | | Greece | | Local investigator |
| Nikolaos |  | Papakonstantinou | Athens | | General Oncology Hospital of Kifissia "Agii Anargyri" | | Greece | | Local investigator |
| Evdoxia |  | Tsigou | Athens | | General Oncology Hospital of Kifissia "Agii Anargyri" | | Greece | | Local investigator |
| Archontoula |  | Xifara | Athens | | General Oncology Hospital of Kifissia "Agii Anargyri" | | Greece | | Local investigator |
| Menelaos |  | Zoulamoglou | Athens | | General Oncology Hospital of Kifissia "Agii Anargyri" | | Greece | | Local co-ordinator |
| Panagiota |  | Gkioni | Athens | | Hippokrateion General Hospital | | Greece | | Local investigator |
| Stylianos |  | Karatzas | Athens | | Hippokrateion General Hospital | | Greece | | Local co-ordinator |
| Aikaterini |  | Kyparissi | Athens | | Hippokrateion General Hospital | | Greece | | Local investigator |
| Efstratios |  | Mainas | Athens | | Hippokrateion General Hospital | | Greece | | Local investigator |
| Ioannis |  | Papapanagiotou | Athens | | Hippokrateion General Hospital | | Greece | | Local investigator |
| Theonymfi |  | Papavasilopoulou | Athens | | Hippokrateion General Hospital | | Greece | | Local investigator |
| George |  | Fragandreas | Thessaloniki | | Hippokration General Hospital | | Greece | | Local investigator |
| Eleni |  | Georgopoulou | Thessaloniki | | Hippokration General Hospital | | Greece | | Local investigator |
| Eleni |  | Katsika | Thessaloniki | | Hippokration General Hospital | | Greece | | Local co-ordinator |
| Kyriakos |  | Psarras | Thessaloniki | | Hippokration General Hospital | | Greece | | Local investigator |
| Eirini |  | Synekidou | Thessaloniki | | Hippokration General Hospital | | Greece | | Local investigator |
| Maria |  | Verroiotou | Thessaloniki | | Hippokration General Hospital | | Greece | | Local investigator |
| Evangelia |  | Vetsiou | Thessaloniki | | Hippokration General Hospital | | Greece | | Local investigator |
| Donika |  | Zaimi | Thessaloniki | | Hippokration General Hospital | | Greece | | Local investigator |
| Athina |  | Anagnou | Athens | | Laiko General Hospital of Athens | | Greece | | Local investigator |
| Konstantinos |  | Apostolou | Athens | | Laiko General Hospital of Athens | | Greece | | Local co-ordinator |
| Theodora |  | Melissopoulou | Athens | | Laiko General Hospital of Athens | | Greece | | Local investigator |
| Theophilos |  | Rozenberg | Athens | | Laiko General Hospital of Athens | | Greece | | Local investigator |
| Christos |  | Tsigris | Athens | | Laiko General Hospital of Athens | | Greece | | Local investigator |
| Georgios |  | Boutsikos | Athens | | Naval Hospital of Athens | | Greece | | Local investigator |
| Vasileios |  | Kalles | Athens | | Naval Hospital of Athens | | Greece | | Local investigator |
| Nikolaos |  | Kotsalas | Athens | | Naval Hospital of Athens | | Greece | | Local investigator |
| Christina |  | Lavdaiou | Athens | | Naval Hospital of Athens | | Greece | | Local investigator |
| Fotini |  | Paikou | Athens | | Naval Hospital of Athens | | Greece | | Local investigator |
| Georgia-Laura |  | Panagou | Athens | | Naval Hospital of Athens | | Greece | | Local investigator |
| Anna |  | Spring | Athens | | Naval Hospital of Athens | | Greece | | Local co-ordinator |
| Kostoula |  | Arvaniti | Thessaloniki | | Papageorgiou General Hospital | | Greece | | Local co-ordinator |
| Ioannis |  | Botis | Thessaloniki | | Papageorgiou General Hospital | | Greece | | Local investigator |
| Maria |  | Drimala | Thessaloniki | | Papageorgiou General Hospital | | Greece | | Local investigator |
| Georgios |  | Georgakakis | Thessaloniki | | Papageorgiou General Hospital | | Greece | | Local investigator |
| Ellada |  | Kiourtzieva | Thessaloniki | | Papageorgiou General Hospital | | Greece | | Local investigator |
| Panagiota |  | Ntouma | Thessaloniki | | Papageorgiou General Hospital | | Greece | | Local investigator |
| Apostolos |  | Prionas | Thessaloniki | | Papageorgiou General Hospital | | Greece | | Local investigator |
| Kyriakos |  | Xouplidis | Thessaloniki | | Papageorgiou General Hospital | | Greece | | Local investigator |
| Eleftheria |  | Dalampini | Thessaloniki | | Papageorgiou General Hospital | | Greece | | Local co-ordinator |
| Chrysavgi |  | Giannaki | Thessaloniki | | Papageorgiou General Hospital | | Greece | | Local investigator |
| Christina |  | Iasonidou | Thessaloniki | | Papageorgiou General Hospital | | Greece | | Local investigator |
| Orestis |  | Ioannidis | Thessaloniki | | Papageorgiou General Hospital | | Greece | | Local investigator |
| Athina |  | Lavrentieva | Thessaloniki | | Papageorgiou General Hospital | | Greece | | Local investigator |
| Athena |  | Lavrentieva | Thessaloniki | | Papageorgiou General Hospital | | Greece | | Local investigator |
| George |  | Papageorgiou | Thessaloniki | | Papageorgiou General Hospital | | Greece | | Local investigator |
| Maria |  | Kokkinoy | Athens | | Sismanogleio General Hospital of Athens | | Greece | | Local investigator |
| Maria |  | Stafylaraki | Athens | | Sismanogleio General Hospital of Athens | | Greece | | Local co-ordinator |
| Stylianos |  | Gaitanakis | Athens | | Sotiria General Hospital of Thoracic Diseases Athens | | Greece | | Local co-ordinator |
| Periclis |  | Karydakis | Athens | | Sotiria General Hospital of Thoracic Diseases Athens | | Greece | | Local co-ordinator |
| Josef |  | Paltoglou | Athens | | Sotiria General Hospital of Thoracic Diseases Athens | | Greece | | Local investigator |
| Panagiotis |  | Ponireas | Athens | | Sotiria General Hospital of Thoracic Diseases Athens | | Greece | | Local investigator |
| Panagiotis |  | Chaloulis | Thessaloniki | | Theageneio Hospital | | Greece | | Local investigator |
| Athanasios |  | Provatidis | Thessaloniki | | Theageneio Hospital | | Greece | | Local investigator |
| Anisoglou |  | Sousana | Thessaloniki | | Theageneio Hospital | | Greece | | Local co-ordinator |
| Varvara | Vanessa | Gardikou | Pireas | | Tzaneion General Hospital of Pireus | | Greece | | Local co-ordinator |
| Maria |  | Konstantivelli | Pireas | | Tzaneion General Hospital of Pireus | | Greece | | Local investigator |
| Olga |  | Lataniotou | Pireas | | Tzaneion General Hospital of Pireus | | Greece | | Local investigator |
| Elisavet |  | Lisari | Pireas | | Tzaneion General Hospital of Pireus | | Greece | | Local investigator |
| Maria |  | Margaroni | Pireas | | Tzaneion General Hospital of Pireus | | Greece | | Local investigator |
| Konstantinos |  | Stamatiou | Pireas | | Tzaneion General Hospital of Pireus | | Greece | | Local investigator |
| Edouardos |  | Nikolaidis | Alexandroupoli | | University Hospital of Alexandroupoli | | Greece | | Local investigator |
| Ioannis |  | Pnevmatikos | Alexandroupoli | | University Hospital of Alexandroupoli | | Greece | | Local co-ordinator |
| Eleni |  | Sertaridou | Alexandroupoli | | University Hospital of Alexandroupoli | | Greece | | Local investigator |
| Alexandros |  | Andreou | Iraklio | | University Hospital of Heraklion | | Greece | | Local investigator |
| Eleni |  | Arkalaki | Iraklio | | University Hospital of Heraklion | | Greece | | Local investigator |
| Elias |  | Athanasakis | Iraklio | | University Hospital of Heraklion | | Greece | | Local investigator |
| Fotini |  | Chaniotaki | Iraklio | | University Hospital of Heraklion | | Greece | | Local investigator |
| Aikaterini |  | Chatzimichali | Iraklio | | University Hospital of Heraklion | | Greece | | Local investigator |
| Maria |  | Christofaki | Iraklio | | University Hospital of Heraklion | | Greece | | Local investigator |
| Despina |  | Dermitzaki | Iraklio | | University Hospital of Heraklion | | Greece | | Local investigator |
| Klara |  | Fiorentza | Iraklio | | University Hospital of Heraklion | | Greece | | Local investigator |
| Georgios |  | Frantzeskos | Iraklio | | University Hospital of Heraklion | | Greece | | Local investigator |
| Elisavet |  | Geromarkaki | Iraklio | | University Hospital of Heraklion | | Greece | | Local investigator |
| Kalliopi |  | Kafkalaki | Iraklio | | University Hospital of Heraklion | | Greece | | Local investigator |
| Marina |  | Kalogridaki | Iraklio | | University Hospital of Heraklion | | Greece | | Local investigator |
| Konstyllia |  | Karydi | Iraklio | | University Hospital of Heraklion | | Greece | | Local investigator |
| Sofia |  | Kokkini | Iraklio | | University Hospital of Heraklion | | Greece | | Local investigator |
| Georgios |  | Kougentakis | Iraklio | | University Hospital of Heraklion | | Greece | | Local investigator |
| Tatiana |  | Lefaki | Iraklio | | University Hospital of Heraklion | | Greece | | Local investigator |
| Emmanouhl |  | Lilitsis | Iraklio | | University Hospital of Heraklion | | Greece | | Local investigator |
| Aikaterini |  | Makatounaki | Iraklio | | University Hospital of Heraklion | | Greece | | Local investigator |
| Polychronis |  | Malliotakis | Iraklio | | University Hospital of Heraklion | | Greece | | Local co-ordinator |
| Dimosthenis |  | Michelakis | Iraklio | | University Hospital of Heraklion | | Greece | | Local investigator |
| Maria |  | Neonaki | Iraklio | | University Hospital of Heraklion | | Greece | | Local investigator |
| Vasileia |  | Nyktari | Iraklio | | University Hospital of Heraklion | | Greece | | Local co-ordinator |
| Iliana |  | Palikyra | Iraklio | | University Hospital of Heraklion | | Greece | | Local investigator |
| Eleftherios |  | Papadakis | Iraklio | | University Hospital of Heraklion | | Greece | | Local investigator |
| Alexandra |  | Papaioannou | Iraklio | | University Hospital of Heraklion | | Greece | | Local investigator |
| Konstantinos |  | Sfakianakis | Iraklio | | University Hospital of Heraklion | | Greece | | Local investigator |
| Maria |  | Sgouraki | Iraklio | | University Hospital of Heraklion | | Greece | | Local investigator |
| Xenia |  | Souvatzis | Iraklio | | University Hospital of Heraklion | | Greece | | Local investigator |
| Anastasia |  | Spartinou | Iraklio | | University Hospital of Heraklion | | Greece | | Local investigator |
| Nefeli |  | Stefanidou | Iraklio | | University Hospital of Heraklion | | Greece | | Local investigator |
| Paulina |  | Syrogianni | Iraklio | | University Hospital of Heraklion | | Greece | | Local investigator |
| Georgia |  | Tsagkaraki | Iraklio | | University Hospital of Heraklion | | Greece | | Local investigator |
| Elena |  | Arnaoutoglou | Janina | | University Hospital of Ioannina | | Greece | | Local investigator |
| Christina |  | Arnaoutoglou | Janina | | University Hospital of Ioannina | | Greece | | Local investigator |
| Christina |  | Bali | Janina | | University Hospital of Ioannina | | Greece | | Local investigator |
| Vasilios |  | Bouris | Janina | | University Hospital of Ioannina | | Greece | | Local investigator |
| Rodamanthos |  | Doumos | Janina | | University Hospital of Ioannina | | Greece | | Local investigator |
| Konstantia-Paraskevi |  | Gkini | Janina | | University Hospital of Ioannina | | Greece | | Local investigator |
| Clio |  | Kapaktsi | Janina | | University Hospital of Ioannina | | Greece | | Local investigator |
| Vasilios |  | Koulouras | Janina | | University Hospital of Ioannina | | Greece | | Local co-ordinator |
| Arian |  | Lena | Janina | | University Hospital of Ioannina | | Greece | | Local investigator |
| Dimitra |  | Lepida | Janina | | University Hospital of Ioannina | | Greece | | Local investigator |
| Evangelos |  | Michos | Janina | | University Hospital of Ioannina | | Greece | | Local investigator |
| Dimitrios |  | Papadopoulos | Janina | | University Hospital of Ioannina | | Greece | | Local investigator |
| Minas |  | Paschopoulos | Janina | | University Hospital of Ioannina | | Greece | | Local investigator |
| Vaia | Aliki | Rompou | Janina | | University Hospital of Ioannina | | Greece | | Local investigator |
| Ioanna |  | Siouti | Janina | | University Hospital of Ioannina | | Greece | | Local investigator |
| Stavros |  | Tsampalas | Janina | | University Hospital of Ioannina | | Greece | | Local investigator |
| Ourania |  | Ververidou | Janina | | University Hospital of Ioannina | | Greece | | Local investigator |
| Georgios |  | Zilis | Janina | | University Hospital of Ioannina | | Greece | | Local investigator |
| Alexandra |  | Charlalampidoy | Larissa | | University Hospital of Larisa | | Greece | | Local investigator |
| Gregory |  | Christodoulidis | Larissa | | University Hospital of Larisa | | Greece | | Local investigator |
| Andreas |  | Flossos | Larissa | | University Hospital of Larisa | | Greece | | Local co-ordinator |
| Konstantinos |  | Stamoulis | Larissa | | University Hospital of Larisa | | Greece | | Local investigator |
| Matthew |  | Chan | Hong Kong | | Alice Ho Miu Ling Nethersole Hospital | | Hong Kong | | Local co-ordinator |
| Man Shing | Caleb | Tsang | Hong Kong | | Alice Ho Miu Ling Nethersole Hospital | | Hong Kong | | Local investigator |
| Man Shing |  | Tsang | Hong Kong | | Alice Ho Miu Ling Nethersole Hospital | | Hong Kong | | Local investigator |
| Man | Ling | Lai | Hong Kong | | Caritas Medical Center | | Hong Kong | | Local investigator |
| Chi | Pang | Yip | Hong Kong | | Caritas Medical Center | | Hong Kong | | Local co-ordinator |
| Hey Man | Heymans | Chan | Hong Kong | | Kwong Wah Hospital | | Hong Kong | | Local co-ordinator |
| Bassanio |  | Law | Hong Kong | | Kwong Wah Hospital | | Hong Kong | | Local investigator |
| Wing | Sze | Li | Hong Kong | | North District Hospital | | Hong Kong | | Local co-ordinator |
| Hiu | Man | Chu | Hong Kong | | Pamela Youde Nethersole Eastern Hospital | | Hong Kong | | Local investigator |
| Emily | Gar Yee | Koo | Hong Kong | | Pamela Youde Nethersole Eastern Hospital | | Hong Kong | | Local co-ordinator |
| Chi Cheong | Joe | Lam | Hong Kong | | Pamela Youde Nethersole Eastern Hospital | | Hong Kong | | Local investigator |
| Ka | Ho | Cheng | Hong Kong | | Pok Oi Hospital | | Hong Kong | | Local co-ordinator |
| Matthew |  | Chan | Hong Kong | | Prince of Wales Hospital | | Hong Kong | | Local co-ordinator |
| Tracy |  | Lam | Hong Kong | | Prince of Wales Hospital | | Hong Kong | | Local investigator |
| Susanna |  | Chu | Hong Kong | | Princess Margaret Hospital | | Hong Kong | | Local co-ordinator |
| Man | Ling | Lai | Hong Kong | | Princess Margaret Hospital | | Hong Kong | | Local investigator |
| Wing | yan | Lam | Hong Kong | | Princess Margaret Hospital | | Hong Kong | | Local investigator |
| Kin | Wai Kevin | Wong | Hong Kong | | Queen Elizabeth Hospital | | Hong Kong | | Local co-ordinator |
| Dilys |  | Kwok | Hong Kong | | Queen Mary Hospital | | Hong Kong | | Local co-ordinator |
| Ching Yue | Janice | Hung | Hong Kong | | Queen Mary Hospital | | Hong Kong | | Local investigator |
| Wai Kit | Jacky | Chan | Hong Kong | | Ruttonjee Hospital | | Hong Kong | | Local co-ordinator |
| Wing |  | LamWong | Hong Kong | | Tuen Mun Hospital | | Hong Kong | | Local co-ordinator |
| Chun Kwong | Eric | Chung | Hong Kong | | United Christian Hospital | | Hong Kong | | Local co-ordinator |
| Man | Ling | Lai | Hong Kong | | Yan Chai Hospital | | Hong Kong | | Local co-ordinator |
| Shu Kai |  | Ma | Hong Kong | | Yan Chai Hospital | | Hong Kong | | Local investigator |
| Shuchi |  | Kaushik | Ahmedabad | | Cims Hospital | | India | | Local investigator |
| Bhagyesh |  | Shah | Ahmedabad | | Cims Hospital | | India | | Local co-ordinator |
| Dhiren |  | Shah | Ahmedabad | | Cims Hospital | | India | | Local investigator |
| Sanjay |  | Shah | Ahmedabad | | Cims Hospital | | India | | Local investigator |
| Praburaj |  | Ar | Karnataka | | National Institute of Mental Health & Neurosciences | | India | | Local investigator |
| Radhakrishnan |  | Muthuchellappan | Karnataka | | National Institute of Mental Health & Neurosciences | | India | | Local co-ordinator |
| Vandana |  | Agarwal | Maharashtra | | Tata Memorial Centre | | India | | Local investigator |
| Jigeeshu |  | Divatia | Maharashtra | | Tata Memorial Centre | | India | | Local investigator |
| Atul |  | Kulkarni | Maharashtra | | Tata Memorial Centre | | India | | Local co-ordinator |
| Sanghamitra |  | Mishra | Maharashtra | | Tata Memorial Centre | | India | | Local investigator |
| Ganesh |  | Nimje | Maharashtra | | Tata Memorial Centre | | India | | Local investigator |
| Swati |  | Pande | Maharashtra | | Tata Memorial Centre | | India | | Local investigator |
| Sukhada |  | Savarkar | Maharashtra | | Tata Memorial Centre | | India | | Local investigator |
| Aditi |  | Shrivastava | Maharashtra | | Tata Memorial Centre | | India | | Local investigator |
| Martin |  | Thomas | Maharashtra | | Tata Memorial Centre | | India | | Local investigator |
| Shashikant |  | Yegnaram | Maharashtra | | Tata Memorial Centre | | India | | Local investigator |
| Rahmat |  | Hidayatullah | Riau | | RS Awal Bros Pekanbaru | | Indonesia | | Local co-ordinator |
| Susilo |  | Chandra | Jakarta | | RS Dr. Cipto Mangunkusumo | | Indonesia | | Local co-ordinator |
| Aida |  | Tantri | Jakarta | | RS Dr. Cipto Mangunkusumo | | Indonesia | | Local investigator |
| Nasman |  | Puar | Sumatera Barat | | RS Dr. M. Djamil | | Indonesia | | Local co-ordinator |
| Sumara |  | Niman | Kalimantan Barat | | RS St. Antonius | | Indonesia | | Local co-ordinator |
| Imai |  | Indra | Aceh | | RSU Zainal Abidin | | Indonesia | | Local co-ordinator |
| Zulkarnain |  | Hamzah | Jawa Timur | | RSUD Ibnu Sina Kabupaten Gresik | | Indonesia | | Local co-ordinator |
| Annika |  | Yuliana | Riau | | RSUD Indrasari Rengat | | Indonesia | | Local co-ordinator |
| Ucu | Nurhadiat | Abidin | Jawa Barat | | RSUD Karawang | | Indonesia | | Local co-ordinator |
| Ade | Nurkacan | Dursin | Jawa Barat | | RSUD Karawang | | Indonesia | | Local investigator |
| Andri |  | Kurnia | Kepulauan Riau | | RSUD Natuna | | Indonesia | | Local co-ordinator |
| Ade |  | Susanti | Jambi | | RSUD Raden Mattaher | | Indonesia | | Local co-ordinator |
| Dini |  | Handayani | Ruteng | | RSUD Ruteng | | Indonesia | | Local co-ordinator |
| Mahaalit Alit |  | Aribawa | Bali | | RSUD Sanglah | | Indonesia | | Local investigator |
| Aryabiantara |  | Arya | Bali | | RSUD Sanglah | | Indonesia | | Local investigator |
| Tjokorda | Gde Agung | Senapathi | Bali | | RSUD Sanglah | | Indonesia | | Local co-ordinator |
| Utara | Hartawan | Utara | Bali | | RSUD Sanglah | | Indonesia | | Local investigator |
| Widnyana | Made | Wid | Bali | | RSUD Sanglah | | Indonesia | | Local investigator |
| Semarawima |  | Wima | Bali | | RSUD Sanglah | | Indonesia | | Local investigator |
| Wiryana | Made | Wir | Bali | | RSUD Sanglah | | Indonesia | | Local investigator |
| Brillyan |  | Jehosua | Sulawesi Utara | | RSUP Prof Dr. R. D. Kandou | | Indonesia | | Local investigator |
| Jonathan |  | Kaunang | Sulawesi Utara | | RSUP Prof Dr. R. D. Kandou | | Indonesia | | Local investigator |
| Eka | Yudha | Lantang | Sulawesi Utara | | RSUP Prof Dr. R. D. Kandou | | Indonesia | | Local co-ordinator |
| Rini |  | Najoan | Sulawesi Utara | | RSUP Prof Dr. R. D. Kandou | | Indonesia | | Local investigator |
| Neil |  | Waworuntu | Sulawesi Utara | | RSUP Prof Dr. R. D. Kandou | | Indonesia | | Local investigator |
| Hadi |  | Awad | Kerbala | | Al Hussain Medical City Teaching Hospital in Kerbala | | Iraq | | Local investigator |
| Akram |  | Fuad | Kerbala | | Al Hussain Medical City Teaching Hospital in Kerbala | | Iraq | | Local investigator |
| Emad |  | Geddoa | Kerbala | | Al Hussain Medical City Teaching Hospital in Kerbala | | Iraq | | Local co-ordinator |
| Burair |  | Geddoa | Kerbala | | Al Hussain Medical City Teaching Hospital in Kerbala | | Iraq | | Local investigator |
| Abdel | Razzaq | Khalaf | Kerbala | | Al Hussain Medical City Teaching Hospital in Kerbala | | Iraq | | Local co-ordinator |
| Sabah |  | Al hussaini | Kerbala | | Al Saffeer Hospital in Kerbala | | Iraq | | Local co-ordinator |
| Safauldeensalem |  | Albaj | Najaf | | Alsadder Teaching Hospital in Najaf | | Iraq | | Local co-ordinator |
| Maithem |  | Kenber | Najaf | | Najaf Teaching Hospital | | Iraq | | Local co-ordinator |
| Alessandra |  | Bettinelli | Cona | | Arcispedale Sant'Anna | | Italy | | Local investigator |
| Savino |  | Spadaro | Cona | | Arcispedale Sant'Anna | | Italy | | Local co-ordinator |
| Carlo | Alberto | Volta | Cona | | Arcispedale Sant'Anna | | Italy | | Local co-ordinator |
| Luigi |  | Giancarlo | Catania | | Azienda Ospedaliera per l'Emergenza Cannizzaro | | Italy | | Local investigator |
| Vicari |  | Sottosanti | Catania | | Azienda Ospedaliera per l'Emergenza Cannizzaro | | Italy | | Local co-ordinator |
| Giorgio |  | Della Rocca | Udine | | Azienda Ospedaliero Universitaria, Udine | | Italy | | Local co-ordinator |
| Lorenzo |  | Spagnesi | Udine | | Azienda Ospedaliero Universitaria, Udine | | Italy | | Local co-ordinator |
| Ilaria |  | Toretti | Udine | | Azienda Ospedaliero Universitaria, Udine | | Italy | | Local investigator |
| Chiara |  | Alloj | Torino | | Azienda Sanitaria Ospedaliera "Cardinal Massaia" | | Italy | | Local investigator |
| Silvano |  | Cardellino | Torino | | Azienda Sanitaria Ospedaliera "Cardinal Massaia" | | Italy | | Local investigator |
| Livio |  | Carmino | Torino | | Azienda Sanitaria Ospedaliera "Cardinal Massaia" | | Italy | | Local investigator |
| Eleonora |  | Costanzo | Torino | | Azienda Sanitaria Ospedaliera "Cardinal Massaia" | | Italy | | Local investigator |
| Lucia | Caterina | Fanfani | Torino | | Azienda Sanitaria Ospedaliera "Cardinal Massaia" | | Italy | | Local investigator |
| Maria Teresa |  | Novelli | Torino | | Azienda Sanitaria Ospedaliera "Cardinal Massaia" | | Italy | | Local investigator |
| Agostino |  | Roasio | Torino | | Azienda Sanitaria Ospedaliera "Cardinal Massaia" | | Italy | | Local co-ordinator |
| Mattia |  | Bellandi | Milano | | IRCCS S. Raffaele, Milano | | Italy | | Local investigator |
| Luigi |  | Beretta | Milano | | IRCCS S. Raffaele, Milano | | Italy | | Local investigator |
| Elena |  | Bignami | Milano | | IRCCS S. Raffaele, Milano | | Italy | | Local co-ordinator |
| Speranza |  | Bocchino | Milano | | IRCCS S. Raffaele, Milano | | Italy | | Local investigator |
| Luca |  | Cabrini | Milano | | IRCCS S. Raffaele, Milano | | Italy | | Local investigator |
| Daniele |  | Corti | Milano | | IRCCS S. Raffaele, Milano | | Italy | | Local investigator |
| Giovanni |  | Landoni | Milano | | IRCCS S. Raffaele, Milano | | Italy | | Local investigator |
| Roberta |  | Meroni | Milano | | IRCCS S. Raffaele, Milano | | Italy | | Local investigator |
| Elena |  | Moizo | Milano | | IRCCS S. Raffaele, Milano | | Italy | | Local investigator |
| Giacomo |  | Monti | Milano | | IRCCS S. Raffaele, Milano | | Italy | | Local co-ordinator |
| Margherita |  | Pintaudi | Milano | | IRCCS S. Raffaele, Milano | | Italy | | Local investigator |
| Valentina | Paola | Plumari | Milano | | IRCCS S. Raffaele, Milano | | Italy | | Local investigator |
| Daiana |  | Taddeo | Milano | | IRCCS S. Raffaele, Milano | | Italy | | Local investigator |
| Valentina |  | Testa | Milano | | IRCCS S. Raffaele, Milano | | Italy | | Local investigator |
| Dario |  | Winterton | Milano | | IRCCS S. Raffaele, Milano | | Italy | | Local investigator |
| Alberto |  | Zangrillo | Milano | | IRCCS S. Raffaele, Milano | | Italy | | Local investigator |
| Luigi | Maria | Cloro | Rossano | | Nicola Giannettasio Hospital, Rossano | | Italy | | Local investigator |
| Chiara |  | Colangelo | Rossano | | Nicola Giannettasio Hospital, Rossano | | Italy | | Local investigator |
| Antonio |  | Colangelo | Rossano | | Nicola Giannettasio Hospital, Rossano | | Italy | | Local investigator |
| Giuseppe |  | Rotunno | Rossano | | Nicola Giannettasio Hospital, Rossano | | Italy | | Local co-ordinator |
| Miguel Paludi |  | Angel | Rossano | | Nicola Giannettasio Hospital, Rossano | | Italy | | Local investigator |
| Cloro | Paolo | Maria | Rossano | | Nicola Giannettasio Hospital, Rossano | | Italy | | Local investigator |
| Antonio |  | Pata | Rossano | | Nicola Giannettasio Hospital, Rossano | | Italy | | Local investigator |
| Vieri |  | Parrini | Borgo San Lorenzo | | Ospedale Borgo San Lorenzo | | Italy | | Local co-ordinator |
| Alessandro |  | Gatta | Riccione | | Ospedale Ceccarini, Riccione | | Italy | | Local co-ordinator |
| Mauro |  | Nastasi | Riccione | | Ospedale Ceccarini, Riccione | | Italy | | Local investigator |
| Carla |  | Tinti | Riccione | | Ospedale Ceccarini, Riccione | | Italy | | Local investigator |
| Lorenzo |  | Spagnesi | Perugia | | Santa Maria della Misericordia Hospital | | Italy | | Local co-ordinator |
| Mario |  | Arrigo | Gallarate | | Sant'Antonio Abate Hospital, Gallarate | | Italy | | Local investigator |
| Angelo |  | Benevento | Gallarate | | Sant'Antonio Abate Hospital, Gallarate | | Italy | | Local investigator |
| Corrado |  | Bottini | Gallarate | | Sant'Antonio Abate Hospital, Gallarate | | Italy | | Local investigator |
| Maurizio |  | Cannavo' | Gallarate | | Sant'Antonio Abate Hospital, Gallarate | | Italy | | Local investigator |
| Christian |  | Gastaldi | Gallarate | | Sant'Antonio Abate Hospital, Gallarate | | Italy | | Local investigator |
| Alessandro |  | Marchesi | Gallarate | | Sant'Antonio Abate Hospital, Gallarate | | Italy | | Local investigator |
| Angelantonio |  | Pascazio | Gallarate | | Sant'Antonio Abate Hospital, Gallarate | | Italy | | Local investigator |
| Francesco |  | Pata | Gallarate | | Sant'Antonio Abate Hospital, Gallarate | | Italy | | Local co-ordinator |
| Emilio |  | Pozzi | Gallarate | | Sant'Antonio Abate Hospital, Gallarate | | Italy | | Local investigator |
| Alberto |  | Premoli | Gallarate | | Sant'Antonio Abate Hospital, Gallarate | | Italy | | Local investigator |
| Gaetano |  | Tessera | Gallarate | | Sant'Antonio Abate Hospital, Gallarate | | Italy | | Local investigator |
| Luca |  | Boschi | Bologna | | S'Orsola Malpighi | | Italy | | Local investigator |
| Rocco |  | D'Andrea | Bologna | | S'Orsola Malpighi | | Italy | | Local investigator |
| Federico |  | Ghignone | Bologna | | S'Orsola Malpighi | | Italy | | Local investigator |
| Gilberto |  | Poggioli | Bologna | | S'Orsola Malpighi | | Italy | | Local investigator |
| Andrea |  | Sibilio | Bologna | | S'Orsola Malpighi | | Italy | | Local investigator |
| Mario |  | Taffurelli | Bologna | | S'Orsola Malpighi | | Italy | | Local investigator |
| Giampaolo |  | Ugolini | Bologna | | S'Orsola Malpighi | | Italy | | Local co-ordinator |
| Mohd | Azuan | Ab Majid | Sandakan | | Duchess of Kent Hospital, Sandakan | | Malaysia | | Local investigator |
| Rusnah |  | Ab Rahman | Sandakan | | Duchess of Kent Hospital, Sandakan | | Malaysia | | Local co-ordinator |
| James |  | Joseph | Sandakan | | Duchess of Kent Hospital, Sandakan | | Malaysia | | Local investigator |
| Furquan |  | Pathan | Sandakan | | Duchess of Kent Hospital, Sandakan | | Malaysia | | Local investigator |
| Mohammad | Hafizshah Sybil | Shah | Sandakan | | Duchess of Kent Hospital, Sandakan | | Malaysia | | Local investigator |
| Huey | Ling | Yap | Sandakan | | Duchess of Kent Hospital, Sandakan | | Malaysia | | Local investigator |
| Seleen |  | Cheah | Pulau Pinang | | Hospital Pulau Pinang | | Malaysia | | Local investigator |
| Im | Im | Chin | Pulau Pinang | | Hospital Pulau Pinang | | Malaysia | | Local investigator |
| Ji | Keon | Looi | Pulau Pinang | | Hospital Pulau Pinang | | Malaysia | | Local investigator |
| Siew | Ching | Tan | Pulau Pinang | | Hospital Pulau Pinang | | Malaysia | | Local co-ordinator |
| Sheshendrasurian |  | Visvalingam | Pulau Pinang | | Hospital Pulau Pinang | | Malaysia | | Local investigator |
| Fan | Yin | Kwok | Kuala Lumpur | | Kuala Lumpur Hospital | | Malaysia | | Local co-ordinator |
| Chew | Kiok | Lee | Kuala Lumpur | | Kuala Lumpur Hospital | | Malaysia | | Local investigator |
| Tse | Siang | Tan | Kuala Lumpur | | Kuala Lumpur Hospital | | Malaysia | | Local investigator |
| Sze | Meng | Wong | Kuala Lumpur | | Kuala Lumpur Hospital | | Malaysia | | Local investigator |
| Noor | Hairiza | Abdullah | Malacca | | Malacca Hospital | | Malaysia | | Local investigator |
| Chiat | Fong | Liew | Malacca | | Malacca Hospital | | Malaysia | | Local investigator |
| Lovenia |  | Luxuman | Malacca | | Malacca Hospital | | Malaysia | | Local investigator |
| Nor | Hafizah | Mohd Zin | Malacca | | Malacca Hospital | | Malaysia | | Local investigator |
| Muhamad | Faiz | Norddin | Malacca | | Malacca Hospital | | Malaysia | | Local investigator |
| Raja | Liza Raja | Alias | Malacca | | Malacca Hospital | | Malaysia | | Local co-ordinator |
| Juan | Yong | Wong | Malacca | | Malacca Hospital | | Malaysia | | Local investigator |
| Johnny |  | Yong | Likas | | Sabah Women and Children's Hospital (Likas Hospital) | | Malaysia | | Local co-ordinator |
| Mohd | Tarmimi | Bin Mustapha | Sarawak | | Sarawak General Hospital | | Malaysia | | Local investigator |
| Weng | Ken | Chan | Sarawak | | Sarawak General Hospital | | Malaysia | | Local investigator |
| Norizawati |  | Dzulkipli | Sarawak | | Sarawak General Hospital | | Malaysia | | Local co-ordinator |
| Pei | Xuan | Kuan | Sarawak | | Sarawak General Hospital | | Malaysia | | Local investigator |
| Yew | Ching | Lee | Sarawak | | Sarawak General Hospital | | Malaysia | | Local investigator |
| Anita |  | Alias | Sibu | | Sibu Hospital | | Malaysia | | Local co-ordinator |
| Eng | Ching | Guok | Sibu | | Sibu Hospital | | Malaysia | | Local investigator |
| Chiun | Chen | Jee | Sibu | | Sibu Hospital | | Malaysia | | Local investigator |
| Brian | Rhadamantyne | Ramon | Sibu | | Sibu Hospital | | Malaysia | | Local investigator |
| Cheng | Wong | Weng | Sibu | | Sibu Hospital | | Malaysia | | Local investigator |
| Fara Nur | Idayu | Abd Ghafar | Johor Bahru | | Sultanah Aminah Hospital (HSA) Johor Bharu | | Malaysia | | Local investigator |
| Faizal | Zuhri | Aziz | Johor Bahru | | Sultanah Aminah Hospital (HSA) Johor Bharu | | Malaysia | | Local investigator |
| Nabilah |  | Hussain | Johor Bahru | | Sultanah Aminah Hospital (HSA) Johor Bharu | | Malaysia | | Local investigator |
| Hooi | Sean | Lee | Johor Bahru | | Sultanah Aminah Hospital (HSA) Johor Bharu | | Malaysia | | Local co-ordinator |
| Ismawaty |  | Sukawi | Johor Bahru | | Sultanah Aminah Hospital (HSA) Johor Bharu | | Malaysia | | Local investigator |
| Yuan | Liang | Woon | Johor Bahru | | Sultanah Aminah Hospital (HSA) Johor Bharu | | Malaysia | | Local investigator |
| Husni | Zaeem | Abd Hadi | Kuala Pilah | | Tuanku Ampuan Najihah Hospital, Kuala Pilah | | Malaysia | | Local investigator |
| Ummi | Azmira | Ahmad Azam | Kuala Pilah | | Tuanku Ampuan Najihah Hospital, Kuala Pilah | | Malaysia | | Local investigator |
| Abdul Hafiz |  | Alias | Kuala Pilah | | Tuanku Ampuan Najihah Hospital, Kuala Pilah | | Malaysia | | Local investigator |
| Saiful | Aizar | Kesut | Kuala Pilah | | Tuanku Ampuan Najihah Hospital, Kuala Pilah | | Malaysia | | Local co-ordinator |
| Jun | May | Lee | Seremban | | Tuanku Jaafar Hospital, Seremban | | Malaysia | | Local investigator |
| Dar | Vin | Ooi | Seremban | | Tuanku Jaafar Hospital, Seremban | | Malaysia | | Local investigator |
| Hetty | Ayuni | Sulaiman | Seremban | | Tuanku Jaafar Hospital, Seremban | | Malaysia | | Local investigator |
| Tengku | Alini | Tengku Lih | Seremban | | Tuanku Jaafar Hospital, Seremban | | Malaysia | | Local co-ordinator |
| Marzida |  | Mansor | Kuala Lumpur | | University Malaya Medical Centre | | Malaysia | | Local co-ordinator |
| Jeyaganesh |  | Veerakumaran | Kuala Lumpur | | University Malaya Medical Centre | | Malaysia | | Local investigator |
| Pastor |  | Luna | Cuajimalpa | | Centro Medico Abc | | Mexico | | Local co-ordinator |
| Eder |  | Rojas | Cuajimalpa | | Centro Medico Abc | | Mexico | | Local investigator |
| Gerardo Esteban | Alvarez | Resendiz | Huixquilucan | | Hospital Angeles Lomas | | Mexico | | Local co-ordinator |
| Darcy Danitza | Mari | Zapata | Huixquilucan | | Hospital Angeles Lomas | | Mexico | | Local investigator |
| Julio Cesar Jesús |  | Aguilar López | México | | Hospital Juárez de México | | Mexico | | Local investigator |
| Armando Adolfo | Alvarez | Flores | México | | Hospital Juárez de México | | Mexico | | Local co-ordinator |
| Juan Carlos | Bravo | Amador | México | | Hospital Juárez de México | | Mexico | | Local investigator |
| Erendira Jocelin | Dominguez | Avila | México | | Hospital Juárez de México | | Mexico | | Local investigator |
| Laura Patricia | González | Aquino | México | | Hospital Juárez de México | | Mexico | | Local investigator |
| Ricardo | Lopez | Rodriguez | México | | Hospital Juárez de México | | Mexico | | Local investigator |
| Mariana | Torres | Landa | México | | Hospital Juárez de México | | Mexico | | Local investigator |
| Emma |  | Urias | Culiacán Rosales | | Hospital Salubridad Culiacan Sinaloa | | Mexico | | Local co-ordinator |
| Markus |  | Hollmann | Amsterdam | | Academic Medical Center Amsterdam | | Netherlands | | Local investigator |
| Abraham |  | Hulst | Amsterdam | | Academic Medical Center Amsterdam | | Netherlands | | Local investigator |
| Osne |  | Kirzner | Amsterdam | | Academic Medical Center Amsterdam | | Netherlands | | Local co-ordinator |
| Benedikt |  | Preckel | Amsterdam | | Academic Medical Center Amsterdam | | Netherlands | | Local co-ordinator |
| Ankie |  | Koopman-van Gemert | Dordrecht | | Albert Schweitzer Hospital | | Netherlands | | Local co-ordinator |
| Arthur |  | Bouwman | Eindhoven | | Catharina Hospital | | Netherlands | | Local co-ordinator |
| Marc |  | Buise | Eindhoven | | Catharina Hospital | | Netherlands | | Local investigator |
| Noortje |  | Tolenaar | Eindhoven | | Catharina Hospital | | Netherlands | | Local investigator |
| Eric |  | Weber | Eindhoven | | Catharina Hospital | | Netherlands | | Local investigator |
| Jennifer |  | de Fretes | Utrecht | | Diakonessenhuis Utrecht | | Netherlands | | Local investigator |
| Peter |  | Houweling | Utrecht | | Diakonessenhuis Utrecht | | Netherlands | | Local co-ordinator |
| Patricia |  | Ormskerk | Rotterdam | | Erasmus Medical Centre | | Netherlands | | Local investigator |
| Jasper |  | Van Bommel | Rotterdam | | Erasmus Medical Centre | | Netherlands | | Local co-ordinator |
| Wolfgang |  | Buhre | Maastricht | | Maastricht University Medical Center | | Netherlands | | Local co-ordinator |
| Marcus |  | Lance | Maastricht | | Maastricht University Medical Center | | Netherlands | | Local investigator |
| Valerie |  | Smit-Fun | Maastricht | | Maastricht University Medical Center | | Netherlands | | Local investigator |
| Tom |  | van Zundert | Maastricht | | Maastricht University Medical Center | | Netherlands | | Local investigator |
| Peter |  | Baas | Groningen | | Martini Hospital | | Netherlands | | Local investigator |
| Hans | Donald | de Boer | Groningen | | Martini Hospital | | Netherlands | | Local co-ordinator |
| Joost |  | Sprakel | Groningen | | Martini Hospital | | Netherlands | | Local investigator |
| Renske |  | Elferink-Vonk | Eschweiler | | St Antonius Hospital | | Netherlands | | Local investigator |
| Peter |  | Noordzij | Eschweiler | | St Antonius Hospital | | Netherlands | | Local co-ordinator |
| Laura |  | van Zeggeren | Eschweiler | | St Antonius Hospital | | Netherlands | | Local investigator |
| Bastiaan |  | Brand | Groningen | | University Medical Center Gronining | | Netherlands | | Local investigator |
| Rob |  | spanjersberg | Groningen | | University Medical Center Gronining | | Netherlands | | Local co-ordinator |
| Janneke |  | ten Bokkel - Andela | Groningen | | University Medical Center Gronining | | Netherlands | | Local investigator |
| Sandra |  | Numan | Utrecht | | University Medical Center Utrecht | | Netherlands | | Local investigator |
| Wilton |  | van Klei | Utrecht | | University Medical Center Utrecht | | Netherlands | | Local investigator |
| Bas |  | van Zaane | Utrecht | | University Medical Center Utrecht | | Netherlands | | Local co-ordinator |
| Christa |  | Boer | Amsterdam | | VU University Medical Center | | Netherlands | | Local co-ordinator |
| Yoni |  | van Duivenvoorde | Amsterdam | | VU University Medical Center | | Netherlands | | Local investigator |
| Jens | Peter | Hering | Hoorn | | Westfriesgasthuis | | Netherlands | | Local investigator |
| Harry |  | Zonneveldt | Hoorn | | Westfriesgasthuis | | Netherlands | | Local co-ordinator |
| Doug |  | Campbell | Auckland | | Ascot Hospital | | New Zealand | | Local co-ordinator |
| Siobhan |  | Hoare | Auckland | | Ascot Hospital | | New Zealand | | Local co-ordinator |
| Sahayam |  | Santa | Auckland | | Ascot Hospital | | New Zealand | | Local investigator |
| Sara | Jane | Allen | Auckland | | Auckland City Hospital | | New Zealand | | Local investigator |
| Vanessa |  | Beavis | Auckland | | Auckland City Hospital | | New Zealand | | Local co-ordinator |
| Rachel |  | Bell | Auckland | | Auckland City Hospital | | New Zealand | | Local investigator |
| Hyun-min | David | Choi | Auckland | | Auckland City Hospital | | New Zealand | | Local investigator |
| Matthew |  | Drake | Auckland | | Auckland City Hospital | | New Zealand | | Local investigator |
| Helen |  | Farrell | Auckland | | Auckland City Hospital | | New Zealand | | Local investigator |
| Kushlin |  | Higgie | Auckland | | Auckland City Hospital | | New Zealand | | Local investigator |
| Kerry |  | Holmes | Auckland | | Auckland City Hospital | | New Zealand | | Local investigator |
| Nicole |  | Jenkins | Auckland | | Auckland City Hospital | | New Zealand | | Local investigator |
| Chang Joon |  | Kim | Auckland | | Auckland City Hospital | | New Zealand | | Local investigator |
| Steven |  | Kim | Auckland | | Auckland City Hospital | | New Zealand | | Local investigator |
| Kiew | Chai | Law | Auckland | | Auckland City Hospital | | New Zealand | | Local investigator |
| Davina |  | McAllister | Auckland | | Auckland City Hospital | | New Zealand | | Local co-ordinator |
| Karen |  | Park | Auckland | | Auckland City Hospital | | New Zealand | | Local investigator |
| Karen |  | Pedersen | Auckland | | Auckland City Hospital | | New Zealand | | Local investigator |
| Leesa |  | Pfeifer | Auckland | | Auckland City Hospital | | New Zealand | | Local investigator |
| Timothy |  | Salmond | Auckland | | Auckland City Hospital | | New Zealand | | Local investigator |
| Martin |  | Steynor | Auckland | | Auckland City Hospital | | New Zealand | | Local investigator |
| Michael |  | Tan | Auckland | | Auckland City Hospital | | New Zealand | | Local investigator |
| Ellen |  | Waymouth | Auckland | | Auckland City Hospital | | New Zealand | | Local investigator |
| Ahmad | Sufian | Ab Rahman | Burwood | | Burwood Hospital | | New Zealand | | Local investigator |
| John |  | Armstrong | Burwood | | Burwood Hospital | | New Zealand | | Local investigator |
| Rosie |  | Dudson | Burwood | | Burwood Hospital | | New Zealand | | Local investigator |
| Nia |  | Jenkins | Burwood | | Burwood Hospital | | New Zealand | | Local investigator |
| Jayashree |  | Nilakant | Burwood | | Burwood Hospital | | New Zealand | | Local investigator |
| Seigne |  | Richard | Burwood | | Burwood Hospital | | New Zealand | | Local co-ordinator |
| Pardeep |  | Virdi | Burwood | | Burwood Hospital | | New Zealand | | Local investigator |
| Liane |  | Dixon | Christchurch | | Christchurch Hospital | | New Zealand | | Local investigator |
| Roana |  | Donohue | Christchurch | | Christchurch Hospital | | New Zealand | | Local investigator |
| Mehreen |  | Farrow | Christchurch | | Christchurch Hospital | | New Zealand | | Local investigator |
| Ross |  | Kennedy | Christchurch | | Christchurch Hospital | | New Zealand | | Local co-ordinator |
| Henderson |  | Marissa | Christchurch | | Christchurch Hospital | | New Zealand | | Local investigator |
| Margie |  | McKellow | Christchurch | | Christchurch Hospital | | New Zealand | | Local co-ordinator |
| Delany |  | Nicola | Christchurch | | Christchurch Hospital | | New Zealand | | Local investigator |
| Rebecca |  | Pascoe | Christchurch | | Christchurch Hospital | | New Zealand | | Local investigator |
| Stephen | John | Roberts | Christchurch | | Christchurch Hospital | | New Zealand | | Local investigator |
| George |  | Rowell | Christchurch | | Christchurch Hospital | | New Zealand | | Local investigator |
| Matthew |  | Sumner | Christchurch | | Christchurch Hospital | | New Zealand | | Local investigator |
| Paul |  | Templer | Dunedin | | Dunedin Hospital | | New Zealand | | Local co-ordinator |
| Shardha |  | Chandrasekharan | Hastings | | Hawke’s Bay Hospital | | New Zealand | | Local co-ordinator |
| Graham |  | Fulton | Hastings | | Hawke’s Bay Hospital | | New Zealand | | Local investigator |
| Ib |  | Jammer | Hastings | | Hawke’s Bay Hospital | | New Zealand | | Local investigator |
| Marlynn |  | Ali | Hutt | | Hutt Hospital | | New Zealand | | Local investigator |
| Richard |  | More | Hutt | | Hutt Hospital | | New Zealand | | Local investigator |
| Leona |  | Wilson | Hutt | | Hutt Hospital | | New Zealand | | Local co-ordinator |
| Yuan Hsuan |  | Chang | Auckland | | Manukau Surgery Centre | | New Zealand | | Local investigator |
| Julia |  | Foley | Auckland | | Manukau Surgery Centre | | New Zealand | | Local investigator |
| Carolyn |  | Fowler | Auckland | | Manukau Surgery Centre | | New Zealand | | Local investigator |
| Jonathan |  | Panckhurst | Auckland | | Manukau Surgery Centre | | New Zealand | | Local investigator |
| Rachel |  | Sara | Auckland | | Manukau Surgery Centre | | New Zealand | | Local investigator |
| Francois |  | Stapelberg | Auckland | | Manukau Surgery Centre | | New Zealand | | Local co-ordinator |
| Doug |  | Campbell | Auckland | | Mercy Hospital | | New Zealand | | Local co-ordinator |
| Veronica |  | Cherrett | Auckland | | Mercy Hospital | | New Zealand | | Local investigator |
| Donna | Louise | Ganter | Auckland | | Mercy Hospital | | New Zealand | | Local investigator |
| Davina |  | McAllister | Auckland | | Mercy Hospital | | New Zealand | | Local co-ordinator |
| Lloyd |  | McCann | Auckland | | Mercy Hospital | | New Zealand | | Local investigator |
| Julia |  | Foley | Auckland | | Middlemore Hospital | | New Zealand | | Local investigator |
| Fiona |  | Gilmour | Auckland | | Middlemore Hospital | | New Zealand | | Local investigator |
| Rachelle |  | Lumsden | Auckland | | Middlemore Hospital | | New Zealand | | Local investigator |
| Mark |  | Moores | Auckland | | Middlemore Hospital | | New Zealand | | Local investigator |
| Sue |  | Olliff | Auckland | | Middlemore Hospital | | New Zealand | | Local investigator |
| Elitza |  | Sardareva | Auckland | | Middlemore Hospital | | New Zealand | | Local investigator |
| Francois |  | Stapelberg | Auckland | | Middlemore Hospital | | New Zealand | | Local co-ordinator |
| Joyce |  | Tai | Auckland | | Middlemore Hospital | | New Zealand | | Local investigator |
| Matthew |  | Wikner | Auckland | | Middlemore Hospital | | New Zealand | | Local investigator |
| Christopher |  | Wong | Auckland | | Middlemore Hospital | | New Zealand | | Local investigator |
| Mark |  | Chaddock | Auckland | | Northshore Hospital | | New Zealand | | Local co-ordinator |
| Carolyn |  | Czepanski | Auckland | | Northshore Hospital | | New Zealand | | Local investigator |
| Patrick |  | McKendry | Auckland | | Northshore Hospital | | New Zealand | | Local investigator |
| Daniel |  | Polakovic | Auckland | | Northshore Hospital | | New Zealand | | Local investigator |
| Daniel |  | Polakovich | Auckland | | Northshore Hospital | | New Zealand | | Local investigator |
| Axe |  | Robert | Auckland | | Northshore Hospital | | New Zealand | | Local investigator |
| Margarita |  | Tormo Belda | Auckland | | Northshore Hospital | | New Zealand | | Local investigator |
| Tracy |  | Norton | Auckland | | Ormiston Hospital | | New Zealand | | Local investigator |
| Francois |  | Stapelberg | Auckland | | Ormiston Hospital | | New Zealand | | Local co-ordinator |
| Fadhel |  | Alherz | Palmerston North | | Palmerston North Hospital | | New Zealand | | Local investigator |
| Lisa |  | Barneto | Palmerston North | | Palmerston North Hospital | | New Zealand | | Local investigator |
| Alberto |  | Ramirez | Palmerston North | | Palmerston North Hospital | | New Zealand | | Local investigator |
| Ahmed |  | Sayeed | Palmerston North | | Palmerston North Hospital | | New Zealand | | Local co-ordinator |
| Nicola |  | Smith | Palmerston North | | Palmerston North Hospital | | New Zealand | | Local investigator |
| Cambell |  | Bennett | Rotorua | | Rotorua Hospital | | New Zealand | | Local co-ordinator |
| Shane |  | McQuoid | Rotorua | | Rotorua Hospital | | New Zealand | | Local co-ordinator |
| Rachel |  | Bell | Invercargill | | Southland Hospital | | New Zealand | | Local investigator |
| Tracy-Lee |  | Jansen | Invercargill | | Southland Hospital | | New Zealand | | Local investigator |
| Zin |  | Nico | Invercargill | | Southland Hospital | | New Zealand | | Local investigator |
| John |  | Scott | Invercargill | | Southland Hospital | | New Zealand | | Local co-ordinator |
| David |  | Freschini | Gisborne | | Tairawhiti District Health | | New Zealand | | Local investigator |
| Angela |  | Freschini | Gisborne | | Tairawhiti District Health | | New Zealand | | Local co-ordinator |
| Brian |  | Hopkins | Gisborne | | Tairawhiti District Health | | New Zealand | | Local investigator |
| Lara |  | Manson | Gisborne | | Tairawhiti District Health | | New Zealand | | Local investigator |
| Deon |  | Stoltz | Gisborne | | Tairawhiti District Health | | New Zealand | | Local investigator |
| Alexander |  | Bates | Tauranga | | Tauranga Hospital | | New Zealand | | Local investigator |
| Simon |  | Davis | Tauranga | | Tauranga Hospital | | New Zealand | | Local investigator |
| Victoria |  | Freeman | Tauranga | | Tauranga Hospital | | New Zealand | | Local co-ordinator |
| Lynette |  | McGaughran | Tauranga | | Tauranga Hospital | | New Zealand | | Local investigator |
| Swarna |  | Baskar Sharma | Hamilton | | Waikato Hospital | | New Zealand | | Local investigator |
| Tom |  | Burrows | Hamilton | | Waikato Hospital | | New Zealand | | Local investigator |
| Kelly |  | Byrne | Hamilton | | Waikato Hospital | | New Zealand | | Local co-ordinator |
| Duane |  | English | Hamilton | | Waikato Hospital | | New Zealand | | Local investigator |
| Robert |  | Johnson | Hamilton | | Waikato Hospital | | New Zealand | | Local investigator |
| Kiew |  | Chai Law | Hamilton | | Waikato Hospital | | New Zealand | | Local investigator |
| Brendon |  | Manikkam | Hamilton | | Waikato Hospital | | New Zealand | | Local investigator |
| Davina |  | McAllister | Hamilton | | Waikato Hospital | | New Zealand | | Local co-ordinator |
| Shaun |  | Naidoo | Hamilton | | Waikato Hospital | | New Zealand | | Local investigator |
| Margot |  | Rumball | Hamilton | | Waikato Hospital | | New Zealand | | Local investigator |
| Nicola |  | Whittle | Hamilton | | Waikato Hospital | | New Zealand | | Local investigator |
| Romilla |  | Franks | Hamilton | | Wellington Hospital | | New Zealand | | Local investigator |
| Hannah |  | Gibson-Lapsley | Hamilton | | Wellington Hospital | | New Zealand | | Local investigator |
| Davina |  | McAllister | Hamilton | | Wellington Hospital | | New Zealand | | Local co-ordinator |
| Ryan |  | Salter | Hamilton | | Wellington Hospital | | New Zealand | | Local investigator |
| Dean |  | Walsh | Hamilton | | Wellington Hospital | | New Zealand | | Local co-ordinator |
| Richard |  | Cooper | Maunu | | Whangarei Hospital | | New Zealand | | Local investigator |
| Katherine |  | Perry | Maunu | | Whangarei Hospital | | New Zealand | | Local co-ordinator |
| Amos |  | Obobolo | Zaria | | Ahmadu Bello University Teaching Hospital | | Nigeria | | Local investigator |
| Umar | Musa | Sule | Zaria | | Ahmadu Bello University Teaching Hospital | | Nigeria | | Local co-ordinator |
| Abdurrahman |  | Ahmad | Kano | | Aminu Kano Teaching Hospital | | Nigeria | | Local investigator |
| Mamuda |  | Atiku | Kano | | Aminu Kano Teaching Hospital | | Nigeria | | Local investigator |
| Alhassan | Datti | Mohammed | Kano | | Aminu Kano Teaching Hospital | | Nigeria | | Local co-ordinator |
| Adamu | Muhammad | Sarki | Kano | | Aminu Kano Teaching Hospital | | Nigeria | | Local investigator |
| Oyebola |  | Adekola | Lagos | | Lagos University Teaching Hospital | | Nigeria | | Local investigator |
| Olanrewaju |  | Akanmu | Lagos | | Lagos University Teaching Hospital | | Nigeria | | Local co-ordinator |
| Adekunle |  | Durodola | Lagos | | Lagos University Teaching Hospital | | Nigeria | | Local investigator |
| Olusegun |  | Olukoju | Lagos | | Lagos University Teaching Hospital | | Nigeria | | Local investigator |
| Victor |  | Raji | Lagos | | Lagos University Teaching Hospital | | Nigeria | | Local investigator |
| Tokunbo |  | Olajumoke | Osogbo | | Lautech Teaching Hospital Osogbo Osun State | | Nigeria | | Local investigator |
| Emmanuel |  | Oyebamiji | Osogbo | | Lautech Teaching Hospital Osogbo Osun State | | Nigeria | | Local co-ordinator |
| Anthony |  | Adenekan | Ife | | Obafemi Awolowo University Teaching Hospitals | | Nigeria | | Local investigator |
| Adedapo |  | Adetoye | Ife | | Obafemi Awolowo University Teaching Hospitals | | Nigeria | | Local investigator |
| Folayemi |  | Faponle | Ife | | Obafemi Awolowo University Teaching Hospitals | | Nigeria | | Local investigator |
| Simeon |  | Olateju | Ife | | Obafemi Awolowo University Teaching Hospitals | | Nigeria | | Local co-ordinator |
| Afolabi |  | Owojuyigbe | Ife | | Obafemi Awolowo University Teaching Hospitals | | Nigeria | | Local investigator |
| Ademola |  | Talabi | Ife | | Obafemi Awolowo University Teaching Hospitals | | Nigeria | | Local investigator |
| Odewabi |  | Adenike | Shagamu | | Olabisi Onabanjo University Teaching Hospital | | Nigeria | | Local investigator |
| Badru |  | Adewale | Shagamu | | Olabisi Onabanjo University Teaching Hospital | | Nigeria | | Local investigator |
| Nwokoro |  | Collins | Shagamu | | Olabisi Onabanjo University Teaching Hospital | | Nigeria | | Local investigator |
| Emmanuel |  | Ezekiel | Shagamu | | Olabisi Onabanjo University Teaching Hospital | | Nigeria | | Local investigator |
| Oluwabunmi | Motunrayo | Fatungase | Shagamu | | Olabisi Onabanjo University Teaching Hospital | | Nigeria | | Local co-ordinator |
| Anuforo |  | Grace | Shagamu | | Olabisi Onabanjo University Teaching Hospital | | Nigeria | | Local investigator |
| Sotannde |  | Sola | Shagamu | | Olabisi Onabanjo University Teaching Hospital | | Nigeria | | Local investigator |
| Ogunmuyiwa |  | Stella | Shagamu | | Olabisi Onabanjo University Teaching Hospital | | Nigeria | | Local investigator |
| Adeyinka |  | Ademola | Ibadan | | University College Hospital | | Nigeria | | Local investigator |
| Augustine | A | Adeolu | Ibadan | | University College Hospital | | Nigeria | | Local investigator |
| Tinuola |  | Adigun | Ibadan | | University College Hospital | | Nigeria | | Local investigator |
| Mukaila |  | Akinwale | Ibadan | | University College Hospital | | Nigeria | | Local investigator |
| Oluyemi |  | Fasina | Ibadan | | University College Hospital | | Nigeria | | Local investigator |
| Olalere |  | Gbolahan | Ibadan | | University College Hospital | | Nigeria | | Local investigator |
| Olusola |  | Idowu | Ibadan | | University College Hospital | | Nigeria | | Local investigator |
| Rotimi | Peter | Olonisakin | Ibadan | | University College Hospital | | Nigeria | | Local investigator |
| Babatunde | Babasola | Osinaike | Ibadan | | University College Hospital | | Nigeria | | Local co-ordinator |
| Felicia |  | Asudo | Gwagwalada | | University of Abuja Teaching Hospital | | Nigeria | | Local co-ordinator |
| Danladi |  | Mshelia | Gwagwalada | | University of Abuja Teaching Hospital | | Nigeria | | Local co-ordinator |
| Lukman |  | Abdur-Rahman | Ilorin | | University of Ilorin Teaching Hospital | | Nigeria | | Local investigator |
| Olayide |  | Agodirin | Ilorin | | University of Ilorin Teaching Hospital | | Nigeria | | Local investigator |
| Jibril |  | Bello | Ilorin | | University of Ilorin Teaching Hospital | | Nigeria | | Local investigator |
| Benjamin |  | Bolaji | Ilorin | | University of Ilorin Teaching Hospital | | Nigeria | | Local investigator |
| Olanrewaju | Olubukola | Oyedepo | Ilorin | | University of Ilorin Teaching Hospital | | Nigeria | | Local co-ordinator |
| Humphrey |  | Ezike | Enugu | | University of Nigeria Teaching Hospital | | Nigeria | | Local investigator |
| Ikechukwu |  | Iloabachie | Enugu | | University of Nigeria Teaching Hospital | | Nigeria | | Local investigator |
| Ikemefuna |  | Okonkwo | Enugu | | University of Nigeria Teaching Hospital | | Nigeria | | Local investigator |
| Elias |  | Onuora | Enugu | | University of Nigeria Teaching Hospital | | Nigeria | | Local investigator |
| Tonia |  | Onyeka | Enugu | | University of Nigeria Teaching Hospital | | Nigeria | | Local co-ordinator |
| Innocent |  | Ugwu | Enugu | | University of Nigeria Teaching Hospital | | Nigeria | | Local investigator |
| Friday |  | Umeh | Enugu | | University of Nigeria Teaching Hospital | | Nigeria | | Local investigator |
| Olubusola |  | Alagbe-Briggs | Port Harcourt | | University of Port Harcourt Teaching Hospital | | Nigeria | | Local co-ordinator |
| Amabra |  | Dodiyi-Manuel | Port Harcourt | | University of Port Harcourt Teaching Hospital | | Nigeria | | Local investigator |
| Richard |  | Echem | Port Harcourt | | University of Port Harcourt Teaching Hospital | | Nigeria | | Local investigator |
| Bright |  | Obasuyi | Port Harcourt | | University of Port Harcourt Teaching Hospital | | Nigeria | | Local investigator |
| Bisola |  | Onajin-Obembe | Port Harcourt | | University of Port Harcourt Teaching Hospital | | Nigeria | | Local investigator |
| Maria | Expedito | Bandeira | Barreiro | | Centro Hospitalar Barreiro Montijo | | Portugal | | Local co-ordinator |
| Alda |  | Martins | Barreiro | | Centro Hospitalar Barreiro Montijo | | Portugal | | Local investigator |
| Miguel |  | Tomé | Barreiro | | Centro Hospitalar Barreiro Montijo | | Portugal | | Local investigator |
| Ana Cristina | Miranda | Martins Costa | Faro | | Centro Hospitalar do Algarve | | Portugal | | Local investigator |
| Andriy |  | Krystopchuk | Faro | | Centro Hospitalar do Algarve | | Portugal | | Local co-ordinator |
| Teresa |  | Branco | Porto | | Centro Hospitalar do Porto, EPE | | Portugal | | Local investigator |
| Simao |  | Esteves | Porto | | Centro Hospitalar do Porto, EPE | | Portugal | | Local investigator |
| Marco | António | Melo | Porto | | Centro Hospitalar do Porto, EPE | | Portugal | | Local investigator |
| Júlia |  | Monte | Porto | | Centro Hospitalar do Porto, EPE | | Portugal | | Local investigator |
| Fernando |  | Rua | Porto | | Centro Hospitalar do Porto, EPE | | Portugal | | Local co-ordinator |
| Isabel |  | Martins | Tondela | | Centro Hospitalar Tondela-Viseu, EPE | | Portugal | | Local investigator |
| Vítor | Miguel | Pinho-Oliveira | Tondela | | Centro Hospitalar Tondela-Viseu, EPE | | Portugal | | Local co-ordinator |
| Carla | Maria | Rodrigues | Tondela | | Centro Hospitalar Tondela-Viseu, EPE | | Portugal | | Local investigator |
| Raquel |  | Cabral | Coimbra | | Centro Hospitalare Universitario de Coimbra | | Portugal | | Local co-ordinator |
| Sofia |  | Marques | Coimbra | | Centro Hospitalare Universitario de Coimbra | | Portugal | | Local investigator |
| Sara |  | Rêgo | Coimbra | | Centro Hospitalare Universitario de Coimbra | | Portugal | | Local investigator |
| Joana | Sofia | Teixeira Jesus | Coimbra | | Centro Hospitalare Universitario de Coimbra | | Portugal | | Local investigator |
| Maria |  | Conceição Marques | Lisboa | | Hospital Curry Cabral | | Portugal | | Local investigator |
| Cristina |  | Romao | Lisboa | | Hospital Curry Cabral | | Portugal | | Local co-ordinator |
| Sandra |  | Dias | Lisboa | | Hospital de S. António dos Capuchos | | Portugal | | Local co-ordinator |
| Ana | Margarida | Santos | Lisboa | | Hospital de S. António dos Capuchos | | Portugal | | Local investigator |
| Maria | Joao | Alves | Lisboa | | Hospital de S. José | | Portugal | | Local co-ordinator |
| Cristina |  | Salta | Lisboa | | Hospital de S. José | | Portugal | | Local investigator |
| Salome |  | Cruz | Lisboa | | Hospital de S. Marta | | Portugal | | Local investigator |
| Célia |  | Duarte | Lisboa | | Hospital de S. Marta | | Portugal | | Local co-ordinator |
| António | Armando | Furtado Paiva | Ponta Delgada | | Hospital do Divino Espírito Santo de Ponta Delgada, EPE | | Portugal | | Local investigator |
| Tiago |  | do Nascimento Cabral | Ponta Delgada | | Hospital do Divino Espírito Santo de Ponta Delgada, EPE | | Portugal | | Local investigator |
| Dionisio |  | Faria e Maia | Ponta Delgada | | Hospital do Divino Espírito Santo de Ponta Delgada, EPE | | Portugal | | Local co-ordinator |
| Rui | Freitas Mendonça | Correia da Silva | Ponta Delgada | | Hospital do Divino Espírito Santo de Ponta Delgada, EPE | | Portugal | | Local investigator |
| Anuschka |  | Langner | Ponta Delgada | | Hospital do Divino Espírito Santo de Ponta Delgada, EPE | | Portugal | | Local investigator |
| Hernâni |  | Oliveira Resendes | Ponta Delgada | | Hospital do Divino Espírito Santo de Ponta Delgada, EPE | | Portugal | | Local investigator |
| Maria |  | da Conceição Soares | Ponta Delgada | | Hospital do Divino Espírito Santo de Ponta Delgada, EPE | | Portugal | | Local investigator |
| Alexandra |  | Abrunhosa | Porto | | IPO, Porto | | Portugal | | Local investigator |
| Filomena |  | Faria | Porto | | IPO, Porto | | Portugal | | Local investigator |
| Lina |  | Miranda | Porto | | IPO, Porto | | Portugal | | Local investigator |
| Helena |  | Pereira | Porto | | IPO, Porto | | Portugal | | Local investigator |
| Sofia |  | Serra | Porto | | IPO, Porto | | Portugal | | Local co-ordinator |
| Daniela |  | Ionescu | Cluj Napoca | | Institul Regional de Gastroenterologie-Hepatologie "Prof. Dr. Octavian Fodor" Cluj Napoca | | Romania | | Local investigator |
| Simona |  | Margarit | Cluj Napoca | | Institul Regional de Gastroenterologie-Hepatologie "Prof. Dr. Octavian Fodor" Cluj Napoca | | Romania | | Local co-ordinator |
| Calin |  | Mitre | Cluj Napoca | | Institul Regional de Gastroenterologie-Hepatologie "Prof. Dr. Octavian Fodor" Cluj Napoca | | Romania | | Local investigator |
| Horatiu |  | Vasian | Cluj Napoca | | Institul Regional de Gastroenterologie-Hepatologie "Prof. Dr. Octavian Fodor" Cluj Napoca | | Romania | | Local investigator |
| Gratiela |  | Manga | Bucarest | | Institutul Clinic Fundeni București | | Romania | | Local investigator |
| Andreea |  | Stefan | Bucarest | | Institutul Clinic Fundeni București | | Romania | | Local investigator |
| Dana |  | Tomescu | Bucarest | | Institutul Clinic Fundeni București | | Romania | | Local co-ordinator |
| Daniela |  | Filipescu | Bucarest | | Institutul de Urgență pentru Boli Cardiovasculare „Prof. Dr. CC Iliescu”, București | | Romania | | Local co-ordinator |
| Marilena-Alina |  | Paunescu | Bucarest | | Institutul de Urgență pentru Boli Cardiovasculare „Prof. Dr. CC Iliescu”, București | | Romania | | Local investigator |
| Mihai |  | Stefan | Bucarest | | Institutul de Urgență pentru Boli Cardiovasculare „Prof. Dr. CC Iliescu”, București | | Romania | | Local investigator |
| Radu |  | Stoica | Bucarest | | Institutul National de Pneumologie “Prof. Dr. Marius Nasta” București | | Romania | | Local co-ordinator |
| Laura |  | Gavril | Iasi | | Institutul Regional de Oncologie Iași | | Romania | | Local co-ordinator |
| Emilia |  | Pătrășcanu | Iasi | | Institutul Regional de Oncologie Iași | | Romania | | Local investigator |
| Irina |  | Ristescu | Iasi | | Institutul Regional de Oncologie Iași | | Romania | | Local investigator |
| Daniel |  | Rusu | Iasi | | Institutul Regional de Oncologie Iași | | Romania | | Local investigator |
| Ciresica |  | Diaconescu | Iasi | | Spitalul Clinic „Dr. C. I. Parhon” Iași | | Romania | | Local co-ordinator |
| Gabriel | Florin | Iosep | Iasi | | Spitalul Clinic de Pneumoftiziologie Iași | | Romania | | Local co-ordinator |
| Dorin |  | Pulbere | Iasi | | Spitalul Clinic de Pneumoftiziologie Iași | | Romania | | Local investigator |
| Irina |  | Ursu | Iasi | | Spitalul Clinic de Recuperare, Iași | | Romania | | Local co-ordinator |
| Andreea |  | Balanescu | Bucarest | | Spitalul Clinic de Urgență București | | Romania | | Local investigator |
| Ioana |  | Grintescu | Bucarest | | Spitalul Clinic de Urgență București | | Romania | | Local co-ordinator |
| Liliana |  | Mirea | Bucarest | | Spitalul Clinic de Urgență București | | Romania | | Local investigator |
| Irina |  | Rentea | Bucarest | | Spitalul Clinic de Urgență București | | Romania | | Local investigator |
| Mihaela |  | Vartic | Bucarest | | Spitalul Clinic de Urgență București | | Romania | | Local investigator |
| Mary-Nicoleta |  | Lupu | Galati | | Spitalul Clinic Județean de Urgență ”Sfântul Apostol Andrei", Galati | | Romania | | Local co-ordinator |
| Dorin |  | Stanescu | Suceava | | Spitalul Clinic Județean de Urgență “Sfântul Ioan cel Nou” Suceava | | Romania | | Local co-ordinator |
| Lavinea |  | Streanga | Suceava | | Spitalul Clinic Județean de Urgență “Sfântul Ioan cel Nou” Suceava | | Romania | | Local investigator |
| Oana |  | Antal | Cluj-Napoca | | Spitalul Clinic Județean de Urgență Cluj-Napoca | | Romania | | Local investigator |
| Natalia |  | Hagau | Cluj-Napoca | | Spitalul Clinic Județean de Urgență Cluj-Napoca | | Romania | | Local co-ordinator |
| Dumitru |  | Patras | Cluj-Napoca | | Spitalul Clinic Județean de Urgență Cluj-Napoca | | Romania | | Local investigator |
| Cristina |  | Petrisor | Cluj-Napoca | | Spitalul Clinic Județean de Urgență Cluj-Napoca | | Romania | | Local investigator |
| Flaviu |  | Tosa | Cluj-Napoca | | Spitalul Clinic Județean de Urgență Cluj-Napoca | | Romania | | Local investigator |
| Sebastian |  | Tranca | Cluj-Napoca | | Spitalul Clinic Județean de Urgență Cluj-Napoca | | Romania | | Local investigator |
| Sanda | Maria | Copotoiu | Târgu Mureș | | Spitalul Clinic Județean de Urgență Mureș | | Romania | | Local co-ordinator |
| Liviu | Lucian | Ungureanu | Piatra Neamț | | Spitalul Clinic Județean de Urgență Piatra Neamț | | Romania | | Local co-ordinator |
| Cristian | Remus | Harsan | Timișoara | | Spitalul Clinic Județean de Urgență Timișoara | | Romania | | Local investigator |
| Marius |  | Papurica | Timișoara | | Spitalul Clinic Județean de Urgență Timișoara | | Romania | | Local co-ordinator |
| Daniela | Denisa | Cernea | Craiova | | Spitalul Clinic Județean de Urgență, Craiova | | Romania | | Local co-ordinator |
| Nicoleta | Alice | Dragoescu | Craiova | | Spitalul Clinic Județean de Urgență, Craiova | | Romania | | Local investigator |
| Laura |  | Aflori | Iasi | | Spitalul Clinic Militar de Urgențe „Iacob Csizac” Iași | | Romania | | Local investigator |
| Carmen |  | Vaida | Iasi | | Spitalul Clinic Militar de Urgențe „Iacob Csizac” Iași | | Romania | | Local co-ordinator |
| Oana | Roxana | Ciobotaru | Galati | | Spitalul General Căi Ferate Galați | | Romania | | Local co-ordinator |
| Mariana |  | Aignatoaie | Focșani | | Spitalul Județean de Urgență „Sfântul Pantelimon” Focșani | | Romania | | Local co-ordinator |
| Cristina | Paula | Carp | Bacău | | Spitalul Județean de Urgență Bacău | | Romania | | Local investigator |
| Isabelle |  | Cobzaru | Bacău | | Spitalul Județean de Urgență Bacău | | Romania | | Local investigator |
| Oana |  | Mardare | Bacău | | Spitalul Județean de Urgență Bacău | | Romania | | Local investigator |
| Bianca |  | Purcarin | Bacău | | Spitalul Județean de Urgență Bacău | | Romania | | Local investigator |
| Valentin |  | Tutunaru | Bacău | | Spitalul Județean de Urgență Bacău | | Romania | | Local co-ordinator |
| Victor |  | Ionita | Bacău | | Spitalul Județean de Urgență, Buzău | | Romania | | Local co-ordinator |
| Mirela |  | Arustei | Vaslui | | Spitalul Județean de Urgență, Vaslui | | Romania | | Local co-ordinator |
| Anisoara |  | Codita | Galați | | Spitalul Militar de Urgență Galați | | Romania | | Local co-ordinator |
| Mihai |  | Busuioc | Bârlad | | Spitalul Municipal de Urgență ”Elena Beldiman”, Bârlad | | Romania | | Local investigator |
| Ion |  | Chilinciuc | Bârlad | | Spitalul Municipal de Urgență ”Elena Beldiman”, Bârlad | | Romania | | Local co-ordinator |
| Cristina |  | Ciobanu | Bârlad | | Spitalul Municipal de Urgență ”Elena Beldiman”, Bârlad | | Romania | | Local investigator |
| Ioana |  | Belciu | Moinești | | Spitalul Municipal de Urgență Moinești | | Romania | | Local investigator |
| Eugen |  | Tincu | Moinești | | Spitalul Municipal de Urgență Moinești | | Romania | | Local co-ordinator |
| Mihaela |  | Blaj | Iasi | | Spitalul Universitar de Urgență “Sf. Spiridon“ Iași | | Romania | | Local co-ordinator |
| Ramona – Mihaela |  | Grosu | Iasi | | Spitalul Universitar de Urgență “Sf. Spiridon“ Iași | | Romania | | Local investigator |
| Gigel |  | Sandu | Iasi | | Spitalul Universitar de Urgență “Sf. Spiridon“ Iași | | Romania | | Local investigator |
| Dana |  | Bruma | Bucarest | | Spitalul Universitar de Urgență Elias București | | Romania | | Local investigator |
| Dan |  | Corneci | Bucarest | | Spitalul Universitar de Urgență Elias București | | Romania | | Local co-ordinator |
| Madalina |  | Dutu | Bucarest | | Spitalul Universitar de Urgență Elias București | | Romania | | Local investigator |
| Adriana |  | Krepil | Bucarest | | Spitalul Universitar de Urgență Elias București | | Romania | | Local investigator |
| Elena |  | Copaciu | Bucarest | | Spitalul Universitar de Urgență, București | | Romania | | Local co-ordinator |
| Clementina | Oana | Dumitrascu | Bucarest | | Spitalul Universitar de Urgență, București | | Romania | | Local investigator |
| Ramona |  | Jemna | Bucarest | | Spitalul Universitar de Urgență, București | | Romania | | Local investigator |
| Florentina |  | Mihaescu | Bucarest | | Spitalul Universitar de Urgență, București | | Romania | | Local investigator |
| Raluca |  | Petre | Bucarest | | Spitalul Universitar de Urgență, București | | Romania | | Local investigator |
| Cristina |  | Tudor | Bucarest | | Spitalul Universitar de Urgență, București | | Romania | | Local investigator |
| Elena |  | Ursache | Bucarest | | Spitalul Universitar de Urgență, București | | Romania | | Local investigator |
| Alexander |  | Kulikov | Moscow | | Burdenko Neurosurgery Institute | | Russia | | Local co-ordinator |
| Andrey |  | Lubnin | Moscow | | Burdenko Neurosurgery Institute | | Russia | | Local investigator |
| Evgeny |  | Grigoryev | Kemerovo | | Cardiosurgical Center, Kemerovo | | Russia | | Local co-ordinator |
| Stanislav |  | Pugachev | Kemerovo | | City Clinical Hospital # 3 named after Podgorbunsky | | Russia | | Local co-ordinator |
| Denis |  | Protsenko | Moscow | | City Hospital #7, State Scientific Research Medical University of Russia | | Russia | | Local co-ordinator |
| Alexander |  | Tolmasov | Moscow | | City Hospital #7, State Scientific Research Medical University of Russia | | Russia | | Local investigator |
| Ayyaz |  | Hussain | Arkhangelsk | | City Hospital 1 of Arkhangelsk, Northern State Medical University | | Russia | | Local co-ordinator |
| Yana |  | Ilyina | Arkhangelsk | | City Hospital 1 of Arkhangelsk, Northern State Medical University | | Russia | | Local investigator |
| Mikhail |  | Kirov | Arkhangelsk | | City Hospital 1 of Arkhangelsk, Northern State Medical University | | Russia | | Local co-ordinator |
| Anna |  | Roshchina | Arkhangelsk | | City Hospital 1 of Arkhangelsk, Northern State Medical University | | Russia | | Local investigator |
| Aleksandr |  | Iurin | Tollyatty | | Clinical City Hospital #5, Tollyatty | | Russia | | Local co-ordinator |
| Elena |  | Chazova | Demidovskiy | | Demidovskiy hospital | | Russia | | Local co-ordinator |
| Artem |  | Dunay | Pesochnyy | | N.N.Petrov Research Institute of Oncology | | Russia | | Local investigator |
| Alexey |  | Karelov | Pesochnyy | | N.N.Petrov Research Institute of Oncology | | Russia | | Local co-ordinator |
| Irina |  | Khvedelidze | Pesochnyy | | N.N.Petrov Research Institute of Oncology | | Russia | | Local investigator |
| Olga |  | Voldaeva | Pesochnyy | | N.N.Petrov Research Institute of Oncology | | Russia | | Local investigator |
| Vladislav |  | Belskiy | Nizhnij Novgorod | | Privolzhskiy District Medical Center | | Russia | | Local co-ordinator |
| Parvin |  | Dzhamullaev | Nizhnij Novgorod | | Privolzhskiy District Medical Center | | Russia | | Local investigator |
| Elena |  | Grishkowez | Nizhnij Novgorod | | Privolzhskiy District Medical Center | | Russia | | Local investigator |
| Vladimir |  | Kretov | Nizhnij Novgorod | | Privolzhskiy District Medical Center | | Russia | | Local investigator |
| Valeriy |  | Levin | Nizhnij Novgorod | | Privolzhskiy District Medical Center | | Russia | | Local investigator |
| Aleksandr |  | Molkov | Nizhnij Novgorod | | Privolzhskiy District Medical Center | | Russia | | Local investigator |
| Sergey |  | Puzanov | Nizhnij Novgorod | | Privolzhskiy District Medical Center | | Russia | | Local investigator |
| Aleksandr |  | Samoilenko | Nizhnij Novgorod | | Privolzhskiy District Medical Center | | Russia | | Local investigator |
| Aleksandr |  | Tchekulaev | Nizhnij Novgorod | | Privolzhskiy District Medical Center | | Russia | | Local investigator |
| Valentina |  | Tulupova | Nizhnij Novgorod | | Privolzhskiy District Medical Center | | Russia | | Local investigator |
| Ivan |  | Utkin | Nizhnij Novgorod | | Privolzhskiy District Medical Center | | Russia | | Local investigator |
| Nikki | Leigh | Allorto | Pietermaritzburg | | Edendale Hospital | | South Africa | | Local investigator |
| David | Gray | Bishop | Pietermaritzburg | | Edendale Hospital | | South Africa | | Local co-ordinator |
| Pierre | Monji | Builu | Pietermaritzburg | | Edendale Hospital | | South Africa | | Local investigator |
| Carel |  | Cairns | Pietermaritzburg | Edendale Hospital | | South Africa | | Local investigator | |
| Ashish |  | Dasrath | Pietermaritzburg | | Edendale Hospital | | South Africa | | Local investigator |
| Jacques |  | de Wet | Pietermaritzburg | | Edendale Hospital | | South Africa | | Local investigator |
| Marielle |  | den Hoedt | Pietermaritzburg | | Edendale Hospital | | South Africa | | Local investigator |
| Ben |  | Grey | Pietermaritzburg | | Edendale Hospital | | South Africa | | Local investigator |
| Morgan | Philip | Hayes | Pietermaritzburg | | Edendale Hospital | | South Africa | | Local investigator |
| Belinda | Senta | Küsel | Pietermaritzburg | | Edendale Hospital | | South Africa | | Local investigator |
| Nomcebo |  | Shangase | Pietermaritzburg | | Edendale Hospital | | South Africa | | Local investigator |
| Robert |  | Wise | Pietermaritzburg | | Edendale Hospital | | South Africa | | Local investigator |
| Sharon |  | Cacala | Pietermaritzburg | | Grey’s Hospital | | South Africa | | Local investigator |
| Zane |  | Farina | Pietermaritzburg | | Grey’s Hospital | | South Africa | | Local investigator |
| Vishendran |  | Govindasamy | Pietermaritzburg | | Grey’s Hospital | | South Africa | | Local co-ordinator |
| Carl-Heinz |  | Kruse | Pietermaritzburg | | Grey’s Hospital | | South Africa | | Local investigator |
| Carolyn |  | Lee | Pietermaritzburg | | Grey’s Hospital | | South Africa | | Local investigator |
| Leonard |  | Marais | Pietermaritzburg | | Grey’s Hospital | | South Africa | | Local investigator |
| Thinagrin | Dhasarthun | Naidoo | Pietermaritzburg | | Grey’s Hospital | | South Africa | | Local investigator |
| Chantal |  | Rajah | Pietermaritzburg | | Grey’s Hospital | | South Africa | | Local investigator |
| Reitze | Nils | Rodseth | Pietermaritzburg | | Grey’s Hospital | | South Africa | | Local investigator |
| Lisa |  | Ryan | Pietermaritzburg | | Grey’s Hospital | | South Africa | | Local investigator |
| Richard |  | von Rhaden | Pietermaritzburg | | Grey’s Hospital | | South Africa | | Local investigator |
| Suwayba |  | Adam | Durban | | Inkosi Albert Luthuli Central Hospital | | South Africa | | Local investigator |
| Christella |  | Alphonsus | Durban | | Inkosi Albert Luthuli Central Hospital | | South Africa | | Local investigator |
| Yusuf |  | Ameer | Durban | | Inkosi Albert Luthuli Central Hospital | | South Africa | | Local investigator |
| Frank |  | Anderson | Durban | | Inkosi Albert Luthuli Central Hospital | | South Africa | | Local investigator |
| Sujith |  | Basanth | Durban | | Inkosi Albert Luthuli Central Hospital | | South Africa | | Local investigator |
| Sudha |  | Bechan | Durban | | Inkosi Albert Luthuli Central Hospital | | South Africa | | Local investigator |
| Chettan |  | Bhula | Durban | | Inkosi Albert Luthuli Central Hospital | | South Africa | | Local investigator |
| Bruce | M | Biccard | Durban | | Inkosi Albert Luthuli Central Hospital | | South Africa | | Local co-ordinator |
| Thuli |  | Biyase | Durban | | Inkosi Albert Luthuli Central Hospital | | South Africa | | Local investigator |
| Ines |  | Buccimazza | Durban | | Inkosi Albert Luthuli Central Hospital | | South Africa | | Local investigator |
| Jorge |  | Cardosa | Durban | | Inkosi Albert Luthuli Central Hospital | | South Africa | | Local investigator |
| James |  | Chen | Durban | | Inkosi Albert Luthuli Central Hospital | | South Africa | | Local investigator |
| Bhavika |  | Daya | Durban | | Inkosi Albert Luthuli Central Hospital | | South Africa | | Local investigator |
| Leanne |  | Drummond | Durban | | Inkosi Albert Luthuli Central Hospital | | South Africa | | Local investigator |
| Ali |  | Elabib | Durban | | Inkosi Albert Luthuli Central Hospital | | South Africa | | Local investigator |
| Ehab | Helmy Abdel | Goad | Durban | | Inkosi Albert Luthuli Central Hospital | | South Africa | | Local investigator |
| Ismail | E | Goga | Durban | | Inkosi Albert Luthuli Central Hospital | | South Africa | | Local investigator |
| Riaz |  | Goga | Durban | | Inkosi Albert Luthuli Central Hospital | | South Africa | | Local investigator |
| R |  | Harrichandparsad | Durban | | Inkosi Albert Luthuli Central Hospital | | South Africa | | Local investigator |
| Richard | E | Hodgson | Durban | | Inkosi Albert Luthuli Central Hospital | | South Africa | | Local investigator |
| J |  | Jordaan | Durban | | Inkosi Albert Luthuli Central Hospital | | South Africa | | Local investigator |
| Nicky |  | Kalafatis | Durban | | Inkosi Albert Luthuli Central Hospital | | South Africa | | Local investigator |
| Christian |  | Kampik | Durban | | Inkosi Albert Luthuli Central Hospital | | South Africa | | Local investigator |
| AT |  | Landers | Durban | | Inkosi Albert Luthuli Central Hospital | | South Africa | | Local investigator |
| Emil |  | Loots | Durban | | Inkosi Albert Luthuli Central Hospital | | South Africa | | Local investigator |
| Rajhmum |  | Madansein | Durban | | Inkosi Albert Luthuli Central Hospital | | South Africa | | Local investigator |
| Anil |  | Madaree | Durban | | Inkosi Albert Luthuli Central Hospital | | South Africa | | Local investigator |
| Thandinkosi | E | Madiba | Durban | | Inkosi Albert Luthuli Central Hospital | | South Africa | | Local investigator |
| Vukani | T | Manzini | Durban | | Inkosi Albert Luthuli Central Hospital | | South Africa | | Local investigator |
| Mbali |  | Mbuyisa | Durban | | Inkosi Albert Luthuli Central Hospital | | South Africa | | Local investigator |
| Rajan |  | Moodley | Durban | | Inkosi Albert Luthuli Central Hospital | | South Africa | | Local investigator |
| Mduduzi |  | Msomi | Durban | | Inkosi Albert Luthuli Central Hospital | | South Africa | | Local investigator |
| Innocent |  | Mukama | Durban | | Inkosi Albert Luthuli Central Hospital | | South Africa | | Local investigator |
| Desigan |  | Naidoo | Durban | | Inkosi Albert Luthuli Central Hospital | | South Africa | | Local investigator |
| Rubeshan |  | Naidoo | Durban | | Inkosi Albert Luthuli Central Hospital | | South Africa | | Local investigator |
| Tesuven | K | Naidu | Durban | | Inkosi Albert Luthuli Central Hospital | | South Africa | | Local investigator |
| Sindiswa |  | Ntloko | Durban | | Inkosi Albert Luthuli Central Hospital | | South Africa | | Local investigator |
| Eneshia |  | Padayachee | Durban | | Inkosi Albert Luthuli Central Hospital | | South Africa | | Local investigator |
| Lucelle |  | Padayachee | Durban | | Inkosi Albert Luthuli Central Hospital | | South Africa | | Local investigator |
| Martijn |  | Phaff | Durban | | Inkosi Albert Luthuli Central Hospital | | South Africa | | Local investigator |
| Bala |  | Pillay | Durban | | Inkosi Albert Luthuli Central Hospital | | South Africa | | Local investigator |
| Desigan |  | Pillay | Durban | | Inkosi Albert Luthuli Central Hospital | | South Africa | | Local investigator |
| Lutchmee |  | Pillay | Durban | | Inkosi Albert Luthuli Central Hospital | | South Africa | | Local investigator |
| Anupa |  | Ramnarain | Durban | | Inkosi Albert Luthuli Central Hospital | | South Africa | | Local investigator |
| Suren | R | Ramphal | Durban | | Inkosi Albert Luthuli Central Hospital | | South Africa | | Local investigator |
| Paul |  | Ryan | Durban | | Inkosi Albert Luthuli Central Hospital | | South Africa | | Local investigator |
| Ahmed |  | Saloojee | Durban | | Inkosi Albert Luthuli Central Hospital | | South Africa | | Local investigator |
| Motshedisi |  | Sebitloane | Durban | | Inkosi Albert Luthuli Central Hospital | | South Africa | | Local investigator |
| Noluyolo |  | Sigcu | Durban | | Inkosi Albert Luthuli Central Hospital | | South Africa | | Local investigator |
| Jenna | L | Taylor | Durban | | Inkosi Albert Luthuli Central Hospital | | South Africa | | Local investigator |
| Alexandra |  | Torborg | Durban | | Inkosi Albert Luthuli Central Hospital | | South Africa | | Local investigator |
| Linda |  | Visser | Durban | | Inkosi Albert Luthuli Central Hospital | | South Africa | | Local investigator |
| Philip |  | Anderson | Kimberley | | Kimberley Hospital Complex | | South Africa | | Local investigator |
| Alae |  | Conradie | Kimberley | | Kimberley Hospital Complex | | South Africa | | Local investigator |
| Mathew |  | de Swardt | Kimberley | | Kimberley Hospital Complex | | South Africa | | Local co-ordinator |
| Martin |  | de Villiers | Kimberley | | Kimberley Hospital Complex | | South Africa | | Local investigator |
| Johan |  | Eikman | Kimberley | | Kimberley Hospital Complex | | South Africa | | Local investigator |
| Riaan |  | Liebenberg | Kimberley | | Kimberley Hospital Complex | | South Africa | | Local investigator |
| Johan |  | Mouton | Kimberley | | Kimberley Hospital Complex | | South Africa | | Local investigator |
| Abbey |  | Paton | Kimberley | | Kimberley Hospital Complex | | South Africa | | Local investigator |
| Louwrence |  | van der Merwe | Kimberley | | Kimberley Hospital Complex | | South Africa | | Local investigator |
| Candice |  | Wilscott-Davids | Kimberley | | Kimberley Hospital Complex | | South Africa | | Local investigator |
| Wendy | Joan | Barrett | Bloemfontein | | National Hospital, Pelonomi Regional Hospital and Universitas Academic Hospital | | South Africa | | Local investigator |
| Marlet |  | Bester | Bloemfontein | | National Hospital, Pelonomi Regional Hospital and Universitas Academic Hospital | | South Africa | | Local investigator |
| Johan |  | de Beer | Bloemfontein | | National Hospital, Pelonomi Regional Hospital and Universitas Academic Hospital | | South Africa | | Local investigator |
| Jacques |  | Geldenhuys | Bloemfontein | | National Hospital, Pelonomi Regional Hospital and Universitas Academic Hospital | | South Africa | | Local investigator |
| Hanni |  | Gouws | Bloemfontein | | National Hospital, Pelonomi Regional Hospital and Universitas Academic Hospital | | South Africa | | Local investigator |
| Jan-Hendrik |  | Potgieter | Bloemfontein | | National Hospital, Pelonomi Regional Hospital and Universitas Academic Hospital | | South Africa | | Local co-ordinator |
| Magdel |  | Strydom | Bloemfontein | | National Hospital, Pelonomi Regional Hospital and Universitas Academic Hospital | | South Africa | | Local investigator |
| Edwin |  | Wilberforce-Turton | Bloemfontein | | National Hospital, Pelonomi Regional Hospital and Universitas Academic Hospital | | South Africa | | Local investigator |
| Rubendraj | R | Chetty | Durban | | King Edward VII Hospital | | South Africa | | Local investigator |
| Subash |  | Chirkut | Durban | | King Edward VII Hospital | | South Africa | | Local investigator |
| Larissa |  | Cronje | Durban | | King Edward VII Hospital | | South Africa | | Local co-ordinator |
| Kim |  | de Vasconcellos | Durban | | King Edward VII Hospital | | South Africa | | Local investigator |
| Nokukhanya | Z | Dube | Durban | | King Edward VII Hospital | | South Africa | | Local investigator |
| N |  | Sibusiso Gama | Durban | | King Edward VII Hospital | | South Africa | | Local investigator |
| Garyth | M | Green | Durban | | King Edward VII Hospital | | South Africa | | Local investigator |
| Randolph |  | Green-Thompson | Durban | | King Edward VII Hospital | | South Africa | | Local investigator |
| Suman | Mewa | Kinoo | Durban | | King Edward VII Hospital | | South Africa | | Local investigator |
| Prenolin |  | Kistnasami | Durban | | King Edward VII Hospital | | South Africa | | Local investigator |
| Kapil |  | Maharaj | Durban | | King Edward VII Hospital | | South Africa | | Local investigator |
| Manogaran | S | Moodley | Durban | | King Edward VII Hospital | | South Africa | | Local investigator |
| Sibongile | J | Mothae | Durban | | King Edward VII Hospital | | South Africa | | Local investigator |
| Ruvashni |  | Naidoo | Durban | | King Edward VII Hospital | | South Africa | | Local investigator |
| M |  | Aslam | Durban | | King Edward VII Hospital | | South Africa | | Local investigator |
| F |  | Noorbhai | Durban | | King Edward VII Hospital | | South Africa | | Local investigator |
| Vivesh |  | Rughubar | Durban | | King Edward VII Hospital | | South Africa | | Local investigator |
| Jenendhiran |  | Reddy | Durban | | King Edward VII Hospital | | South Africa | | Local investigator |
| Avesh |  | Singh | Durban | | King Edward VII Hospital | | South Africa | | Local investigator |
| David | L | Skinner | Durban | | King Edward VII Hospital | | South Africa | | Local investigator |
| Murray | J | Smith | Durban | | King Edward VII Hospital | | South Africa | | Local investigator |
| Bhagwan |  | Singh | Durban | | King Edward VII Hospital | | South Africa | | Local investigator |
| Ravi |  | Misra | Empangeni | | Ngwelezane Hospital | | South Africa | | Local investigator |
| Maheshwar |  | Naidoo | Empangeni | | Ngwelezane Hospital | | South Africa | | Local investigator |
| Pireshin |  | Ramdharee | Empangeni | | Ngwelezane Hospital | | South Africa | | Local investigator |
| Yvonne |  | Selibea | Empangeni | | Ngwelezane Hospital | | South Africa | | Local investigator |
| Selina |  | Sewpersad | Empangeni | | Ngwelezane Hospital | | South Africa | | Local co-ordinator |
| Shailendra |  | Sham | Empangeni | | Ngwelezane Hospital | | South Africa | | Local investigator |
| Joseph | D | Wessels | Empangeni | | Ngwelezane Hospital | | South Africa | | Local investigator |
| Cucu |  | Africander | Port Shepstone | | Port Shepstone Hospital | | South Africa | | Local investigator |
| Tarek |  | Bejia | Port Shepstone | | Port Shepstone Hospital | | South Africa | | Local investigator |
| Stephen | P | Blakemore | Port Shepstone | | Port Shepstone Hospital | | South Africa | | Local co-ordinator |
| Marisa |  | Botes | Port Shepstone | | Port Shepstone Hospital | | South Africa | | Local investigator |
| Bimalshakth |  | Bunwarie | Port Shepstone | | Port Shepstone Hospital | | South Africa | | Local investigator |
| Carlos | B | Hernandez | Port Shepstone | | Port Shepstone Hospital | | South Africa | | Local investigator |
| Mohammud | A | Jeeraz | Port Shepstone | | Port Shepstone Hospital | | South Africa | | Local investigator |
| Dagmara | A | Legutko | Port Shepstone | | Port Shepstone Hospital | | South Africa | | Local investigator |
| Acela | G | Lopez | Port Shepstone | | Port Shepstone Hospital | | South Africa | | Local investigator |
| Jenine | N | De Meyer | Port Shepstone | | Port Shepstone Hospital | | South Africa | | Local investigator |
| Tanaka |  | Muzenda | Port Shepstone | | Port Shepstone Hospital | | South Africa | | Local investigator |
| Noel |  | Naidoo | Port Shepstone | | Port Shepstone Hospital | | South Africa | | Local co-ordinator |
| Maryam |  | Patel | Port Shepstone | | Port Shepstone Hospital | | South Africa | | Local investigator |
| Rao |  | Pentela | Port Shepstone | | Port Shepstone Hospital | | South Africa | | Local investigator |
| Marina |  | Junge | Port Shepstone | | Port Shepstone Hospital | | South Africa | | Local investigator |
| Naj |  | Mansoor | Port Shepstone | | Port Shepstone Hospital | | South Africa | | Local investigator |
| Lana |  | Rademan | Port Shepstone | | Port Shepstone Hospital | | South Africa | | Local investigator |
| Pawel |  | Scislowski | Port Shepstone | | Port Shepstone Hospital | | South Africa | | Local investigator |
| Ismail |  | Seedat | Port Shepstone | | Port Shepstone Hospital | | South Africa | | Local investigator |
| Bianca |  | van den Berg | Port Shepstone | | Port Shepstone Hospital | | South Africa | | Local investigator |
| Doreen |  | van der Merwe | Port Shepstone | | Port Shepstone Hospital | | South Africa | | Local investigator |
| Steyn |  | van Wyk | Port Shepstone | | Port Shepstone Hospital | | South Africa | | Local investigator |
| Komalan |  | Govender | Umlazi | | Prince Mshiyeni Hospital | | South Africa | | Local co-ordinator |
| Darshan |  | Naicker | Umlazi | | Prince Mshiyeni Hospital | | South Africa | | Local investigator |
| Rajesh |  | Ramjee | Umlazi | | Prince Mshiyeni Hospital | | South Africa | | Local investigator |
| Mueen |  | Saley | Umlazi | | Prince Mshiyeni Hospital | | South Africa | | Local investigator |
| Warren | Paul | Kuhn | Durban | | Stanger Hospital | | South Africa | | Local investigator |
| Roel |  | Matos-Puig | Durban | | Stanger Hospital | | South Africa | | Local co-ordinator |
| Zaheer |  | Moolla | Durban | | Stanger Hospital | | South Africa | | Local co-ordinator |
| Alberto |  | Lisi | Barcelona | | Corporacio Sanitaria Parc Tauli | | Spain | | Local co-ordinator |
| Gisela |  | Perez | Barcelona | | Corporacio Sanitaria Parc Tauli | | Spain | | Local investigator |
| Anna |  | Valle Beltran | Barcelona | | Corporacio Sanitaria Parc Tauli | | Spain | | Local investigator |
| Angels |  | Lozano | Valencia | | Hospital Clinico Universitario Valencia | | Spain | | Local investigator |
| Carlos |  | Delgado Navarro | Valencia | | Hospital Clinico Universitario Valencia | | Spain | | Local investigator |
| Alejandro |  | Duca | Valencia | | Hospital Clinico Universitario Valencia | | Spain | | Local investigator |
| Ernesto |  | Pastor Martinez | Valencia | | Hospital Clinico Universitario Valencia | | Spain | | Local investigator |
| Carlos |  | Ferrando | Valencia | | Hospital Clinico Universitario Valencia | | Spain | | Local co-ordinator |
| Isabel |  | Fuentes | Valencia | | Hospital Clinico Universitario Valencia | | Spain | | Local investigator |
| Maria | Luisa | García-Pérez | Valencia | | Hospital Clinico Universitario Valencia | | Spain | | Local investigator |
| Estefania |  | Gracia | Valencia | | Hospital Clinico Universitario Valencia | | Spain | | Local investigator |
| Ana |  | Izquierdo Palomares | Valencia | | Hospital Clinico Universitario Valencia | | Spain | | Local investigator |
| Antonio |  | Katime | Valencia | | Hospital Clinico Universitario Valencia | | Spain | | Local investigator |
| Amanda |  | Miñana | Valencia | | Hospital Clinico Universitario Valencia | | Spain | | Local investigator |
| Raul |  | Incertis | Valencia | | Hospital Clinico Universitario Valencia | | Spain | | Local investigator |
| Esther |  | Romero | Valencia | | Hospital Clinico Universitario Valencia | | Spain | | Local investigator |
| Carolina | Soledad | Romero Garcia | Valencia | | Hospital Clinico Universitario Valencia | | Spain | | Local investigator |
| Concepcion |  | Rubio | Valencia | | Hospital Clinico Universitario Valencia | | Spain | | Local investigator |
| Tania |  | Socorro Artiles | Valencia | | Hospital Clinico Universitario Valencia | | Spain | | Local investigator |
| Marina |  | Soro | Valencia | | Hospital Clinico Universitario Valencia | | Spain | | Local investigator |
| Paola |  | Valls | Valencia | | Hospital Clinico Universitario Valencia | | Spain | | Local investigator |
| Gisela | Alaman | Laguarda | Valencia | | Hospital de la Ribera | | Spain | | Local investigator |
| Pau |  | Benavent | Valencia | | Hospital de la Ribera | | Spain | | Local investigator |
| Vicente | Chisbert | Cuenca | Valencia | | Hospital de la Ribera | | Spain | | Local investigator |
| Andreu |  | Cueva | Valencia | | Hospital de la Ribera | | Spain | | Local investigator |
| Matilde |  | Lafuente | Valencia | | Hospital de la Ribera | | Spain | | Local investigator |
| Asuncion | Marques | Parra | Valencia | | Hospital de la Ribera | | Spain | | Local investigator |
| Alejandra | Romero | Rodrigo | Valencia | | Hospital de la Ribera | | Spain | | Local investigator |
| Silvia |  | Sanchez-Morcillo | Valencia | | Hospital de la Ribera | | Spain | | Local co-ordinator |
| Sergi |  | Tormo | Valencia | | Hospital de la Ribera | | Spain | | Local investigator |
| Francisco | Javier | Redondo | Ciudad Real | | Hospital General Universitario Ciudad Real | | Spain | | Local co-ordinator |
| Jose |  | De Andres | Valencia | | Hospital General Valencia | | Spain | | Local investigator |
| Lorena |  | Gómez Diago | Valencia | | Hospital General Valencia | | Spain | | Local investigator |
| Maria | José | Hernández Cádiz | Valencia | | Hospital General Valencia | | Spain | | Local investigator |
| Granell | Gil | Manuel | Valencia | | Hospital General Valencia | | Spain | | Local co-ordinator |
| Raquel |  | Peris | Valencia | | Hospital General Valencia | | Spain | | Local investigator |
| Cristina |  | Saiz | Valencia | | Hospital General Valencia | | Spain | | Local investigator |
| Jose |  | Tatay | Valencia | | Hospital General Valencia | | Spain | | Local investigator |
| Maria | Teresa | Tebar Soto | Bilbo | | Hospital Universitario Basurto | | Spain | | Local co-ordinator |
| Tamara |  | Brunete | Madrid | | Hospital Universitario Fundación Alcorcón | | Spain | | Local investigator |
| David |  | Cancho | Madrid | | Hospital Universitario Fundación Alcorcón | | Spain | | Local investigator |
| David | R | Delgado García | Madrid | | Hospital Universitario Fundación Alcorcón | | Spain | | Local investigator |
| Diana |  | Zamudio | Madrid | | Hospital Universitario Fundación Alcorcón | | Spain | | Local investigator |
| Santiago |  | Garcia Del Valle | Madrid | | Hospital Universitario Fundación Alcorcón | | Spain | | Local investigator |
| M |  | Luz Serrano | Madrid | | Hospital Universitario Fundación Alcorcón | | Spain | | Local co-ordinator |
| Eduardo |  | Alonso | Madrid | | Hospital Universitario La Paz | | Spain | | Local investigator |
| Victor |  | Anillo | Madrid | | Hospital Universitario La Paz | | Spain | | Local investigator |
| Emilio |  | Maseda | Madrid | | Hospital Universitario La Paz | | Spain | | Local co-ordinator |
| Patricia |  | Salgado | Madrid | | Hospital Universitario La Paz | | Spain | | Local investigator |
| Luis |  | Suarez | Madrid | | Hospital Universitario La Paz | | Spain | | Local investigator |
| Alejandro |  | Suarez-de-la-Rica | Madrid | | Hospital Universitario La Paz | | Spain | | Local investigator |
| María | José | Villagrán | Madrid | | Hospital Universitario La Paz | | Spain | | Local investigator |
| Cesar |  | Aldecoa | Valladolid | | Hospital Universitario Rio Hortega | | Spain | | Local co-ordinator |
| José | Ignacio | Alonso | Valladolid | | Hospital Universitario Rio Hortega | | Spain | | Local investigator |
| Estefania |  | Cabezuelo | Valladolid | | Hospital Universitario Rio Hortega | | Spain | | Local investigator |
| Irene |  | Garcia-Saiz | Valladolid | | Hospital Universitario Rio Hortega | | Spain | | Local investigator |
| Olga |  | Lopez del Moral | Valladolid | | Hospital Universitario Rio Hortega | | Spain | | Local investigator |
| Silvia |  | Martín | Valladolid | | Hospital Universitario Rio Hortega | | Spain | | Local investigator |
| Alba |  | Perez Gonzalez | Valladolid | | Hospital Universitario Rio Hortega | | Spain | | Local investigator |
| Sherezade |  | Tovar Doncel | Valladolid | | Hospital Universitario Rio Hortega | | Spain | | Local investigator |
| Martin | Agüero | Vera | Zaragoza | | Hospital Virgen de la Salud | | Spain | | Local investigator |
| Francisco | José | Ávila Sánchez | Zaragoza | | Hospital Virgen de la Salud | | Spain | | Local investigator |
| Beatriz |  | Castaño | Zaragoza | | Hospital Virgen de la Salud | | Spain | | Local investigator |
| Beatriz |  | Castaño Moreira | Zaragoza | | Hospital Virgen de la Salud | | Spain | | Local investigator |
| Sahely |  | Flores Risco | Zaragoza | | Hospital Virgen de la Salud | | Spain | | Local investigator |
| Daniel |  | Paz Martín | Zaragoza | | Hospital Virgen de la Salud | | Spain | | Local co-ordinator |
| Fernando |  | Pérez Martín | Zaragoza | | Hospital Virgen de la Salud | | Spain | | Local investigator |
| Paloma |  | Poza | Zaragoza | | Hospital Virgen de la Salud | | Spain | | Local investigator |
| Adela |  | Ruiz | Zaragoza | | Hospital Virgen de la Salud | | Spain | | Local investigator |
| Wilson | Fabio | Serna Martínez | Zaragoza | | Hospital Virgen de la Salud | | Spain | | Local investigator |
| Bárbara | Vázquez | Vicente | Zaragoza | | Hospital Virgen de la Salud | | Spain | | Local investigator |
| Saul | Velaz | Dominguez | Zaragoza | | Hospital Virgen de la Salud | | Spain | | Local investigator |
| Salvador |  | Fernández | Málaga | | Regional Universitario Carlos Haya | | Spain | | Local investigator |
| Alfonso |  | Munoz-López | Málaga | | Regional Universitario Carlos Haya | | Spain | | Local co-ordinator |
| Maria | Jose | Bernat | Barcelona | | Sant Joan Despí Moisès Broggi | | Spain | | Local investigator |
| Arantxa |  | Mas | Barcelona | | Sant Joan Despí Moisès Broggi | | Spain | | Local co-ordinator |
| Kenneth |  | Planas | Barcelona | | Sant Joan Despí Moisès Broggi | | Spain | | Local investigator |
| Monir |  | Jawad | Kristianstad | | Central Hospital in Kristianstad | | Sweden | | Local co-ordinator |
| Yousif |  | Saeed | Kristianstad | | Central Hospital in Kristianstad | | Sweden | | Local investigator |
| Annika |  | Hedin | Gävle | | Gävle Hospital | | Sweden | | Local co-ordinator |
| Helena |  | Levander | Gävle | | Gävle Hospital | | Sweden | | Local investigator |
| Michelle |  | Chew | Halmstad | | Hallands Sjukhus Halmstad | | Sweden | | Local co-ordinator |
| Sandra |  | Holmström | Halmstad | | Hallands Sjukhus Halmstad | | Sweden | | Local investigator |
| David |  | Lönn | Halmstad | | Hallands Sjukhus Halmstad | | Sweden | | Local co-ordinator |
| Frank |  | Zoerner | Halmstad | | Hallands Sjukhus Halmstad | | Sweden | | Local co-ordinator |
| Irene |  | Åkring | Varberg | | Hallands Sjukhus Varberg | | Sweden | | Local investigator |
| Carl |  | Widmark | Varberg | | Hallands Sjukhus Varberg | | Sweden | | Local co-ordinator |
| Jan |  | Zettergren | Varberg | | Hallands Sjukhus Varberg | | Sweden | | Local investigator |
| Victor | Aspelund | Liljequist | Huddinge | | Karolinska University Hospital Huddinge | | Sweden | | Local investigator |
| Lena |  | Nystrom | Huddinge | | Karolinska University Hospital Huddinge | | Sweden | | Local investigator |
| Suzanne |  | Odeberg-Wernerman | Huddinge | | Karolinska University Hospital Huddinge | | Sweden | | Local co-ordinator |
| Anders |  | Oldner | Solna | | Karolinska University Hospital Solna | | Sweden | | Local co-ordinator |
| Patrik |  | Reje | Solna | | Karolinska University Hospital Solna | | Sweden | | Local investigator |
| Sara |  | Lyckner | Eskilstuna | | Mälarsjukhuset | | Sweden | | Local investigator |
| Jesper |  | Sperber | Eskilstuna | | Mälarsjukhuset | | Sweden | | Local co-ordinator |
| Anne |  | Adolfsson | Lund | | Skane University Hospital, Lund | | Sweden | | Local investigator |
| Bengt |  | Klarin | Lund | | Skane University Hospital, Lund | | Sweden | | Local co-ordinator |
| Annika |  | Hedin | Umeå | | Umeå University Hospital | | Sweden | | Local co-ordinator |
| Katrin |  | Ögren | Västerås | | Västerås Sjukhus | | Sweden | | Local co-ordinator |
| Jean-Pierre |  | Barras | Solothurn | | Bürgerspital Solothurn | | Switzerland | | Local investigator |
| Thomas |  | Bührer | Solothurn | | Bürgerspital Solothurn | | Switzerland | | Local investigator |
| Vasileios |  | Despotidis | Solothurn | | Bürgerspital Solothurn | | Switzerland | | Local investigator |
| Naeder |  | Helmy | Solothurn | | Bürgerspital Solothurn | | Switzerland | | Local investigator |
| Stephan |  | Holliger | Solothurn | | Bürgerspital Solothurn | | Switzerland | | Local investigator |
| Dimitri | Aristotle | Raptis | Solothurn | | Bürgerspital Solothurn | | Switzerland | | Local co-ordinator |
| Roger |  | Schmid | Solothurn | | Bürgerspital Solothurn | | Switzerland | | Local investigator |
| Antoine |  | Meyer | Fribourg | | Hopital Cantonal de Fribourg HFR | | Switzerland | | Local co-ordinator |
| Yves |  | Jaquet | Neuchatel | | Hopital Neuchatelois | | Switzerland | | Local investigator |
| Ulf |  | Kessler | Neuchatel | | Hopital Neuchatelois | | Switzerland | | Local co-ordinator |
| Mirza |  | Muradbegovic | Neuchatel | | Hopital Neuchatelois | | Switzerland | | Local investigator |
| Solange | R | Nahum | Neuchatel | | Hopital Neuchatelois | | Switzerland | | Local investigator |
| Teresa |  | Rotunno | Neuchatel | | Hopital Neuchatelois | | Switzerland | | Local investigator |
| Boris |  | Schiltz | Neuchatel | | Hopital Neuchatelois | | Switzerland | | Local investigator |
| François |  | Voruz | Neuchatel | | Hopital Neuchatelois | | Switzerland | | Local investigator |
| Marc |  | Worreth | Neuchatel | | Hopital Neuchatelois | | Switzerland | | Local investigator |
| Dimitri |  | Christoforidis | Lugano | | Hospedale Regionale Lugano EOC | | Switzerland | | Local co-ordinator |
| Sotirios | Georgios | Popeskou | Lugano | | Hospedale Regionale Lugano EOC | | Switzerland | | Local investigator |
| Markus |  | Furrer | Chur | | Kantonsspital Graubünden Chur KSGR | | Switzerland | | Local co-ordinator |
| Gian | Andrea | Prevost | Chur | | Kantonsspital Graubünden Chur KSGR | | Switzerland | | Local co-ordinator |
| Andrea |  | Stocker | Chur | | Kantonsspital Graubünden Chur KSGR | | Switzerland | | Local co-ordinator |
| Klaus |  | Lang | Schaffhouse | | Kantonsspital Schaffhausen KSSH | | Switzerland | | Local co-ordinator |
| Stefan |  | Breitenstein | Winterthur | | Kantonsspital Winterthur | | Switzerland | | Local investigator |
| Michael | T | Ganter | Winterthur | | Kantonsspital Winterthur | | Switzerland | | Local co-ordinator |
| Martin |  | Geisen | Winterthur | | Kantonsspital Winterthur | | Switzerland | | Local investigator |
| Christopher |  | Soll | Winterthur | | Kantonsspital Winterthur | | Switzerland | | Local investigator |
| Michelle |  | Korkmaz | Zürich | | Klinik Hirslanden Zürich | | Switzerland | | Local investigator |
| Iris |  | Lubach | Zürich | | Klinik Hirslanden Zürich | | Switzerland | | Local investigator |
| Michael |  | Schmitz | Zürich | | Klinik Hirslanden Zürich | | Switzerland | | Local co-ordinator |
| Moritz |  | Meyer zu Schwabedissen | Schlieren | | Spital Limmattal | | Switzerland | | Local investigator |
| Urs |  | Zingg | Schlieren | | Spital Limmattal | | Switzerland | | Local co-ordinator |
| Thomas |  | Hillermann | Uster | | Spital Uster | | Switzerland | | Local co-ordinator |
| Stefan |  | Wildi | Zürich | | Stadtspital Waid Zürich | | Switzerland | | Local co-ordinator |
| Christoph |  | Hofer | Zürich | | Stadtspital Triemli Zürich | | Switzerland | | Local co-ordinator |
| Bernardo | Bollen | Pinto | Geneva | | University Hospital of Geneva | | Switzerland | | Local co-ordinator |
| Bernhard |  | Walder | Geneva | | University Hospital of Geneva | | Switzerland | | Local co-ordinator |
| Martin |  | Hübner | Lausanne | | University Hospital of Lausanne CHUV | | Switzerland | | Local co-ordinator |
| Giustina |  | Mariotti | Lausanne | | University Hospital of Lausanne CHUV | | Switzerland | | Local investigator |
| Ksenija |  | Slankamenac | Zurich | | University Hospital Zurich | | Switzerland | | Local co-ordinator |
| Mirioce |  | Namuyuga | Jinja | | Jinja Regional Referral Hospital | | Uganda | | Local co-ordinator |
| Edward |  | Kyomugisha | Kabale | | Kabale Hospital | | Uganda | | Local co-ordinator |
| Olivia |  | Kituuka | Kabale | | Kabale Regional Referral Hospital | | Uganda | | Local co-ordinator |
| Anne |  | Wesonga Shikanda | Kisoro | | Kisoro District Hospital | | Uganda | | Local co-ordinator |
| Nasser |  | Kakembo | Kisoro | | Kisoro Hospital | | Uganda | | Local co-ordinator |
| Charles |  | Otim Tom | Mbale | | Mbale Hospital | | Uganda | | Local co-ordinator |
| Antonina |  | Webombesa | Mbale | | Mbale Regional Referral Hospital | | Uganda | | Local investigator |
| Emmanuel |  | Bua | Mbale | | Mbale Regional Referral Hospital | | Uganda | | Local co-ordinator |
| James |  | Ditai | Mbale | | Mbale Regional Referral Hospital | | Uganda | | Local co-ordinator |
| Eden | Michael | Ssettabi | Mbale | | Mbale Regional Referral Hospital | | Uganda | | Local co-ordinator |
| Joseph |  | Epodoi | Soroti | | Soroti Hospital | | Uganda | | Local investigator |
| Fiona |  | Kabagenyi | Soroti | | Soroti Regional Referral Hospital | | Uganda | | Local investigator |
| Fred |  | Kirya | Soroti | | Soroti Regional Referral Hospital | | Uganda | | Local co-ordinator |
| Ged |  | Dempsey | Liverpool | | Aintree University Hospital | | United Kingdom | | Local co-ordinator |
| Colette |  | Seasman | Liverpool | | Aintree University Hospital | | United Kingdom | | Local investigator |
| Raja |  | Basit Nawaz Khan | Keighley | | Airedale General Hospital | | United Kingdom | | Local co-ordinator |
| Claire |  | Kurasz | Keighley | | Airedale General Hospital | | United Kingdom | | Local investigator |
| Mark |  | Macgregor | Ashford | | Ashford Hospital | | United Kingdom | | Local co-ordinator |
| Burhan |  | Shawki | Ashford | | Ashford Hospital | | United Kingdom | | Local investigator |
| Vimal |  | Hariharan | Barnet | | Barnet General Hospital | | United Kingdom | | Local co-ordinator |
| Simon |  | Chau | Barnsley | | Barnsley Hospital | | United Kingdom | | Local co-ordinator |
| Kate |  | Ellis | Barnsley | | Barnsley Hospital | | United Kingdom | | Local co-ordinator |
| Georgina |  | Butt | Basildon | | Basildon and Thurrock Hospital | | United Kingdom | | Local investigator |
| Dennis-Wayne |  | Chicken | Basildon | | Basildon and Thurrock Hospital | | United Kingdom | | Local co-ordinator |
| Natasha |  | Christmas | Basildon | | Basildon and Thurrock Hospital | | United Kingdom | | Local investigator |
| Samantha |  | Allen | Basingstoke | | Basingstoke North Hampshire Hospital | | United Kingdom | | Local investigator |
| Gayatri | Daniel | Daniel | Basingstoke | | Basingstoke North Hampshire Hospital | | United Kingdom | | Local investigator |
| Angie |  | Dempster | Basingstoke | | Basingstoke North Hampshire Hospital | | United Kingdom | | Local investigator |
| Juliette |  | Kemp | Basingstoke | | Basingstoke North Hampshire Hospital | | United Kingdom | | Local co-ordinator |
| Lewis |  | Matthews | Basingstoke | | Basingstoke North Hampshire Hospital | | United Kingdom | | Local investigator |
| Philip |  | Mcglone | Basingstoke | | Basingstoke North Hampshire Hospital | | United Kingdom | | Local investigator |
| Joanne |  | Tambellini | Basingstoke | | Basingstoke North Hampshire Hospital | | United Kingdom | | Local investigator |
| Dawn |  | Trodd | Basingstoke | | Basingstoke North Hampshire Hospital | | United Kingdom | | Local investigator |
| Katie |  | Freitas | Birmingham | | Birmingham Women’s Hospital | | United Kingdom | | Local investigator |
| Atul |  | Garg | Birmingham | | Birmingham Women’s Hospital | | United Kingdom | | Local investigator |
| Shilpaja |  | Karpate | Birmingham | | Birmingham Women’s Hospital | | United Kingdom | | Local investigator |
| Aditi |  | Kulkarni | Birmingham | | Birmingham Women’s Hospital | | United Kingdom | | Local co-ordinator |
| Chloe |  | O'Hara | Birmingham | | Birmingham Women’s Hospital | | United Kingdom | | Local investigator |
| Jtroko |  | Troko | Birmingham | | Birmingham Women’s Hospital | | United Kingdom | | Local investigator |
| Kirsty |  | Angus | Blackpool | | Blackpool Victoria Hospital | | United Kingdom | | Local investigator |
| Jacqueline |  | Bradley | Blackpool | | Blackpool Victoria Hospital | | United Kingdom | | Local investigator |
| Emma |  | Brennan | Blackpool | | Blackpool Victoria Hospital | | United Kingdom | | Local investigator |
| Carolyn |  | Brooks | Blackpool | | Blackpool Victoria Hospital | | United Kingdom | | Local investigator |
| Janette |  | Brown | Blackpool | | Blackpool Victoria Hospital | | United Kingdom | | Local investigator |
| Gemma |  | Brown | Blackpool | | Blackpool Victoria Hospital | | United Kingdom | | Local investigator |
| Amanda |  | Finch | Blackpool | | Blackpool Victoria Hospital | | United Kingdom | | Local investigator |
| Karen |  | Gratrix | Blackpool | | Blackpool Victoria Hospital | | United Kingdom | | Local investigator |
| Sue |  | Hesketh | Blackpool | | Blackpool Victoria Hospital | | United Kingdom | | Local investigator |
| Gillian |  | Hill | Blackpool | | Blackpool Victoria Hospital | | United Kingdom | | Local investigator |
| Carol |  | Jeffs | Blackpool | | Blackpool Victoria Hospital | | United Kingdom | | Local investigator |
| Maureen |  | Morgan | Blackpool | | Blackpool Victoria Hospital | | United Kingdom | | Local investigator |
| Chris |  | Pemberton | Blackpool | | Blackpool Victoria Hospital | | United Kingdom | | Local investigator |
| Nicola |  | Slawson | Blackpool | | Blackpool Victoria Hospital | | United Kingdom | | Local investigator |
| Helen |  | Spickett | Blackpool | | Blackpool Victoria Hospital | | United Kingdom | | Local investigator |
| Gemma |  | Swarbrick | Blackpool | | Blackpool Victoria Hospital | | United Kingdom | | Local investigator |
| Megan |  | Thomas | Blackpool | | Blackpool Victoria Hospital | | United Kingdom | | Local co-ordinator |
| Greta |  | Van Duyvenvoorde | Blackpool | | Blackpool Victoria Hospital | | United Kingdom | | Local investigator |
| Andrew |  | Brennan | Bradford | | Bradford Teaching Hospital | | United Kingdom | | Local co-ordinator |
| Richard |  | Briscoe | Bradford | | Bradford Teaching Hospital | | United Kingdom | | Local investigator |
| Sarah |  | Cooper | Bradford | | Bradford Teaching Hospital | | United Kingdom | | Local investigator |
| Tom |  | Lawton | Bradford | | Bradford Teaching Hospital | | United Kingdom | | Local investigator |
| Martin |  | Northey | Bradford | | Bradford Teaching Hospital | | United Kingdom | | Local investigator |
| Rashmi |  | Senaratne | Bradford | | Bradford Teaching Hospital | | United Kingdom | | Local investigator |
| Helen |  | Stanworth | Bradford | | Bradford Teaching Hospital | | United Kingdom | | Local investigator |
| Lorna |  | Burrows | Bristol | | Bristol Royal Infirmary | | United Kingdom | | Local co-ordinator |
| Helen |  | Cain | Bristol | | Bristol Royal Infirmary | | United Kingdom | | Local investigator |
| Rachael |  | Craven | Bristol | | Bristol Royal Infirmary | | United Kingdom | | Local co-ordinator |
| Keith |  | Davies | Bristol | | Bristol Royal Infirmary | | United Kingdom | | Local investigator |
| Attila |  | Jonas | Bristol | | Bristol Royal Infirmary | | United Kingdom | | Local investigator |
| Marcin |  | Pachucki | Bristol | | Bristol Royal Infirmary | | United Kingdom | | Local investigator |
| Graham |  | Walkden | Bristol | | Bristol Royal Infirmary | | United Kingdom | | Local investigator |
| Helen |  | Davies | Bristol | | Bristol Royal Infirmary | | United Kingdom | | Local co-ordinator |
| Mariethel |  | Gudaca | Bristol | | Bristol Royal Infirmary | | United Kingdom | | Local investigator |
| Maria |  | Hobrok | Aberystwyth | | Bronglais General Hospital | | United Kingdom | | Local co-ordinator |
| Dilshan |  | Arawwawala | Chelmsford | | Broomfield Hospital | | United Kingdom | | Local co-ordinator |
| Lauren |  | Fergey | Chelmsford | | Broomfield Hospital | | United Kingdom | | Local investigator |
| Matthew |  | Gardiner | Chelmsford | | Broomfield Hospital | | United Kingdom | | Local investigator |
| Jacqueline |  | Gunn | Chelmsford | | Broomfield Hospital | | United Kingdom | | Local investigator |
| Lyndsay |  | Johnson | Chelmsford | | Broomfield Hospital | | United Kingdom | | Local investigator |
| Amanda |  | Lofting | Chelmsford | | Broomfield Hospital | | United Kingdom | | Local investigator |
| Amanda |  | Lyle | Chelmsford | | Broomfield Hospital | | United Kingdom | | Local investigator |
| Fiona |  | Mc Neela | Chelmsford | | Broomfield Hospital | | United Kingdom | | Local investigator |
| Susan |  | Smolen | Chelmsford | | Broomfield Hospital | | United Kingdom | | Local investigator |
| Joanne |  | Topliffe | Chelmsford | | Broomfield Hospital | | United Kingdom | | Local investigator |
| Sarah |  | Williams | Chelmsford | | Broomfield Hospital | | United Kingdom | | Local investigator |
| Martin |  | Bland | Burnley | | Burnley General Hospital | | United Kingdom | | Local co-ordinator |
| Vikas |  | Kaura | Cottingham | | Castle Hill Hospital | | United Kingdom | | Local investigator |
| Prasad |  | Lanka | Cottingham | | Castle Hill Hospital | | United Kingdom | | Local investigator |
| Chardé |  | Naylor | Cottingham | | Castle Hill Hospital | | United Kingdom | | Local investigator |
| Neil |  | Smith | Cottingham | | Castle Hill Hospital | | United Kingdom | | Local co-ordinator |
| Ahmed |  | Ahmed | London | | Charing Cross Hospital | | United Kingdom | | Local co-ordinator |
| John |  | Myatt | London | | Charing Cross Hospital | | United Kingdom | | Local investigator |
| Ravikiran |  | Shenoy | London | | Charing Cross Hospital | | United Kingdom | | Local investigator |
| Wai | Cheong | Soon | London | | Charing Cross Hospital | | United Kingdom | | Local investigator |
| Jessica |  | Tan | London | | Charing Cross Hospital | | United Kingdom | | Local investigator |
| Sunny |  | Karadia | Cheltenham | | Cheltenham General Hospital | | United Kingdom | | Local co-ordinator |
| James |  | Self | Cheltenham | | Cheltenham General Hospital | | United Kingdom | | Local co-ordinator |
| Emma |  | Durant | Chorley | | Chorley and South Ribble Hospital | | United Kingdom | | Local investigator |
| Shiva |  | Tripathi | Chorley | | Chorley and South Ribble Hospital | | United Kingdom | | Local co-ordinator |
| Clare |  | Bullock | Colchester | | Colchester General Hospital | | United Kingdom | | Local investigator |
| Debbie |  | Campbell | Colchester | | Colchester General Hospital | | United Kingdom | | Local investigator |
| Alison |  | Ghosh | Colchester | | Colchester General Hospital | | United Kingdom | | Local investigator |
| Thomas |  | Hughes | Colchester | | Colchester General Hospital | | United Kingdom | | Local investigator |
| Lajos |  | Zsisku | Colchester | | Colchester General Hospital | | United Kingdom | | Local co-ordinator |
| Sheshagiri |  | Bengeri | Darlington | | Darlington Memorial Hospital | | United Kingdom | | Local investigator |
| Amanda |  | Cowton | Darlington | | Darlington Memorial Hospital | | United Kingdom | | Local co-ordinator |
| Mohammed | Shazad | Khalid | Darlington | | Darlington Memorial Hospital | | United Kingdom | | Local investigator |
| James |  | Limb | Darlington | | Darlington Memorial Hospital | | United Kingdom | | Local investigator |
| Colin |  | McAdam | Darlington | | Darlington Memorial Hospital | | United Kingdom | | Local investigator |
| Mandy |  | Porritt | Darlington | | Darlington Memorial Hospital | | United Kingdom | | Local investigator |
| M Amir |  | Rafi | Darlington | | Darlington Memorial Hospital | | United Kingdom | | Local co-ordinator |
| Priya |  | Shekar | Darlington | | Darlington Memorial Hospital | | United Kingdom | | Local investigator |
| Catherine |  | Harden | Plymouth | | Derriford Hospital | | United Kingdom | | Local investigator |
| Heidi |  | Hollands | Plymouth | | Derriford Hospital | | United Kingdom | | Local investigator |
| Angela |  | King | Plymouth | | Derriford Hospital | | United Kingdom | | Local investigator |
| Linda |  | March | Plymouth | | Derriford Hospital | | United Kingdom | | Local investigator |
| Gary |  | Minto | Plymouth | | Derriford Hospital | | United Kingdom | | Local co-ordinator |
| Abigail |  | Patrick | Plymouth | | Derriford Hospital | | United Kingdom | | Local investigator |
| Darren |  | Waugh | Plymouth | | Derriford Hospital | | United Kingdom | | Local investigator |
| Paramesh |  | Kumara | Dewsbury | | Dewsbury Hospital | | United Kingdom | | Local investigator |
| Karen |  | Simeson | Dewsbury | | Dewsbury Hospital | | United Kingdom | | Local co-ordinator |
| Jamie |  | Yarwood | Dewsbury | | Dewsbury Hospital | | United Kingdom | | Local investigator |
| Julie |  | Browning | Grimsby | | Diana Princess of Wales Hospital | | United Kingdom | | Local investigator |
| Jonathan |  | Hatton | Grimsby | | Diana Princess of Wales Hospital | | United Kingdom | | Local investigator |
| Howes |  | Julian | Grimsby | | Diana Princess of Wales Hospital | | United Kingdom | | Local investigator |
| Atideb |  | Mitra | Grimsby | | Diana Princess of Wales Hospital | | United Kingdom | | Local co-ordinator |
| Maria |  | Newton | Grimsby | | Diana Princess of Wales Hospital | | United Kingdom | | Local investigator |
| Pawan | Kootelu | Pernu | Grimsby | | Diana Princess of Wales Hospital | | United Kingdom | | Local investigator |
| Alison |  | Wilson | Grimsby | | Diana Princess of Wales Hospital | | United Kingdom | | Local investigator |
| Thelma |  | Commey | Doncaster | | Doncaster Royal Infirmary | | United Kingdom | | Local investigator |
| Helen |  | Foot | Doncaster | | Doncaster Royal Infirmary | | United Kingdom | | Local investigator |
| Lyn |  | Glover | Doncaster | | Doncaster Royal Infirmary | | United Kingdom | | Local investigator |
| Ajay |  | Gupta | Doncaster | | Doncaster Royal Infirmary | | United Kingdom | | Local investigator |
| Nicola |  | Lancaster | Doncaster | | Doncaster Royal Infirmary | | United Kingdom | | Local investigator |
| Jill |  | Levin | Doncaster | | Doncaster Royal Infirmary | | United Kingdom | | Local investigator |
| Felicity |  | Mackenzie | Doncaster | | Doncaster Royal Infirmary | | United Kingdom | | Local investigator |
| Claire |  | Mestanza | Doncaster | | Doncaster Royal Infirmary | | United Kingdom | | Local investigator |
| Emma |  | Nofal | Doncaster | | Doncaster Royal Infirmary | | United Kingdom | | Local investigator |
| Lauren |  | Pout | Doncaster | | Doncaster Royal Infirmary | | United Kingdom | | Local investigator |
| Rosanna |  | Varden | Doncaster | | Doncaster Royal Infirmary | | United Kingdom | | Local investigator |
| Jonathan |  | Wild | Doncaster | | Doncaster Royal Infirmary | | United Kingdom | | Local co-ordinator |
| Stephanie |  | Jones | Dorchester | | Dorset County Hospital | | United Kingdom | | Local co-ordinator |
| Sarah |  | Moreton | Dorchester | | Dorset County Hospital | | United Kingdom | | Local investigator |
| Mark |  | Pulletz | Dorchester | | Dorset County Hospital | | United Kingdom | | Local co-ordinator |
| Charlotte |  | Davies | Bristol | | Frenchay Hospital | | United Kingdom | | Local investigator |
| Matthew |  | Martin | Bristol | | Frenchay Hospital | | United Kingdom | | Local co-ordinator |
| Sian |  | Thomas | Bristol | | Frenchay Hospital | | United Kingdom | | Local investigator |
| Karen |  | Burns | Barrow-in-Furness | | Furness General Hospital | | United Kingdom | | Local investigator |
| Carol |  | McArthur | Barrow-in-Furness | | Furness General Hospital | | United Kingdom | | Local investigator |
| Panna |  | Patel | Barrow-in-Furness | | Furness General Hospital | | United Kingdom | | Local co-ordinator |
| Gary |  | Lau | Leicester | | Glenfield Hospital | | United Kingdom | | Local co-ordinator |
| Natalie |  | Rich | Leicester | | Glenfield Hospital | | United Kingdom | | Local investigator |
| Fiona |  | Davis | Gloucester | | Gloucestershire Royal Hospital | | United Kingdom | | Local co-ordinator |
| James |  | Self | Gloucester | | Gloucestershire Royal Hospital | | United Kingdom | | Local investigator |
| Rachel |  | Lyons | Swindon | | Great Western Hospital | | United Kingdom | | Local investigator |
| Beth |  | Port | Swindon | | Great Western Hospital | | United Kingdom | | Local investigator |
| Rachel |  | Prout | Swindon | | Great Western Hospital | | United Kingdom | | Local investigator |
| Christopher |  | Smith | Swindon | | Great Western Hospital | | United Kingdom | | Local co-ordinator |
| Yemi |  | Adelaja | London | | Guy's Hospital | | United Kingdom | | Local investigator |
| Victoria |  | Bennett | London | | Guy's Hospital | | United Kingdom | | Local investigator |
| Heena |  | Bidd | London | | Guy's Hospital | | United Kingdom | | Local co-ordinator |
| Alexandra |  | Dumitrescu | London | | Guy's Hospital | | United Kingdom | | Local investigator |
| Jacqui | Fox | Murphy | London | | Guy's Hospital | | United Kingdom | | Local investigator |
| Abigail |  | Keen | London | | Guy's Hospital | | United Kingdom | | Local investigator |
| Nhlanhla |  | Mguni | London | | Guy's Hospital | | United Kingdom | | Local investigator |
| Cheng |  | Ong | London | | Guy's Hospital | | United Kingdom | | Local co-ordinator |
| George |  | Adams | London | | Hammersmith Hospital | | United Kingdom | | Local investigator |
| Piers |  | Boshier | London | | Hammersmith Hospital | | United Kingdom | | Local co-ordinator |
| Richard |  | Brown | London | | Hammersmith Hospital | | United Kingdom | | Local investigator |
| Izabella |  | Butryn | London | | Hammersmith Hospital | | United Kingdom | | Local investigator |
| Jayanta |  | Chatterjee | London | | Hammersmith Hospital | | United Kingdom | | Local investigator |
| Alexander |  | Freethy | London | | Hammersmith Hospital | | United Kingdom | | Local investigator |
| Geoffrey |  | Lockwood | London | | Hammersmith Hospital | | United Kingdom | | Local investigator |
| Maria |  | Tsakok | London | | Hammersmith Hospital | | United Kingdom | | Local investigator |
| Sophia |  | Tsiligiannis | London | | Hammersmith Hospital | | United Kingdom | | Local investigator |
| William |  | Peat | Harrogate | | Harrogate District Hospital | | United Kingdom | | Local co-ordinator |
| Lorraine |  | Stephenson | Harrogate | | Harrogate District Hospital | | United Kingdom | | Local co-ordinator |
| Mike |  | Bradburn | Hexham | | Hexham Hospital | | United Kingdom | | Local co-ordinator |
| Sara |  | Pick | Hexham | | Hexham Hospital | | United Kingdom | | Local investigator |
| Pedro |  | Cunha | London | | Homerton University Hospital | | United Kingdom | | Local investigator |
| Olufemi |  | Olagbaiye | London | | Homerton University Hospital | | United Kingdom | | Local co-ordinator |
| Salim |  | Tayeh | London | | Homerton University Hospital | | United Kingdom | | Local investigator |
| Caroline |  | Abernethy | Hull | | Hull Royal Infirmary | | United Kingdom | | Local investigator |
| Madhu |  | Balasubramaniam | Hull | | Hull Royal Infirmary | | United Kingdom | | Local investigator |
| Rachael |  | Bennett | Hull | | Hull Royal Infirmary | | United Kingdom | | Local investigator |
| David |  | Bolton | Hull | | Hull Royal Infirmary | | United Kingdom | | Local investigator |
| Victoria |  | Martinson | Hull | | Hull Royal Infirmary | | United Kingdom | | Local investigator |
| Charde |  | Naylor | Hull | | Hull Royal Infirmary | | United Kingdom | | Local investigator |
| Neil |  | Smith | Hull | | Hull Royal Infirmary | | United Kingdom | | Local co-ordinator |
| Stephanie |  | Bell | Ipswich | | Ipswich Hospital | | United Kingdom | | Local investigator |
| Blaylock |  | Heather | Ipswich | | Ipswich Hospital | | United Kingdom | | Local investigator |
| Vlad |  | Kushakovsky | Ipswich | | Ipswich Hospital | | United Kingdom | | Local co-ordinator |
| Liam |  | Alcock | Middlesbrough | | James Cook University Hospital | | United Kingdom | | Local investigator |
| Hazel |  | Alexander | Middlesbrough | | James Cook University Hospital | | United Kingdom | | Local investigator |
| Colette |  | Anderson | Middlesbrough | | James Cook University Hospital | | United Kingdom | | Local investigator |
| Paul |  | Baker | Middlesbrough | | James Cook University Hospital | | United Kingdom | | Local investigator |
| Morag |  | Brookes | Middlesbrough | | James Cook University Hospital | | United Kingdom | | Local investigator |
| Louise |  | Cawthorn | Middlesbrough | | James Cook University Hospital | | United Kingdom | | Local investigator |
| Emanuel |  | Cirstea | Middlesbrough | | James Cook University Hospital | | United Kingdom | | Local investigator |
| Kerry |  | Colling | Middlesbrough | | James Cook University Hospital | | United Kingdom | | Local investigator |
| Ian |  | Coulter | Middlesbrough | | James Cook University Hospital | | United Kingdom | | Local investigator |
| Suparna |  | Das | Middlesbrough | | James Cook University Hospital | | United Kingdom | | Local investigator |
| Kathryn |  | Haigh | Middlesbrough | | James Cook University Hospital | | United Kingdom | | Local investigator |
| Alhafidz |  | Hamdan | Middlesbrough | | James Cook University Hospital | | United Kingdom | | Local co-ordinator |
| Keith |  | Hugill | Middlesbrough | | James Cook University Hospital | | United Kingdom | | Local investigator |
| Lucksy |  | Kottam | Middlesbrough | | James Cook University Hospital | | United Kingdom | | Local investigator |
| Emily |  | Lisseter | Middlesbrough | | James Cook University Hospital | | United Kingdom | | Local investigator |
| Matthew |  | Mawdsley | Middlesbrough | | James Cook University Hospital | | United Kingdom | | Local co-ordinator |
| Julie |  | McGivern | Middlesbrough | | James Cook University Hospital | | United Kingdom | | Local investigator |
| Krishnaveni |  | Padala | Middlesbrough | | James Cook University Hospital | | United Kingdom | | Local investigator |
| Victoria |  | Phelps | Middlesbrough | | James Cook University Hospital | | United Kingdom | | Local investigator |
| Vineshykaa | Ramesh | kumar | Middlesbrough | | James Cook University Hospital | | United Kingdom | | Local investigator |
| Kirsten |  | Stewart | Middlesbrough | | James Cook University Hospital | | United Kingdom | | Local investigator |
| Kayley |  | Towse | Middlesbrough | | James Cook University Hospital | | United Kingdom | | Local investigator |
| Julie |  | Tregonning | Middlesbrough | | James Cook University Hospital | | United Kingdom | | Local investigator |
| Ali |  | Vahedi | Middlesbrough | | James Cook University Hospital | | United Kingdom | | Local investigator |
| Alycon |  | Walker | Middlesbrough | | James Cook University Hospital | | United Kingdom | | Local investigator |
| Duncan |  | Baines | Kettering | | Kettering General Hospital | | United Kingdom | | Local investigator |
| Anjali |  | Bilolikar | Kettering | | Kettering General Hospital | | United Kingdom | | Local investigator |
| Shiv |  | Chande | Kettering | | Kettering General Hospital | | United Kingdom | | Local investigator |
| Edward |  | Copley | Kettering | | Kettering General Hospital | | United Kingdom | | Local investigator |
| Nigel |  | Dunk | Kettering | | Kettering General Hospital | | United Kingdom | | Local investigator |
| Raghavendra |  | Kulkarni | Kettering | | Kettering General Hospital | | United Kingdom | | Local investigator |
| Pawan |  | Kumar | Kettering | | Kettering General Hospital | | United Kingdom | | Local investigator |
| Yavor |  | Metodiev | Kettering | | Kettering General Hospital | | United Kingdom | | Local investigator |
| Dumisani |  | Ncomanzi | Kettering | | Kettering General Hospital | | United Kingdom | | Local investigator |
| Bhavesh |  | Raithatha | Kettering | | Kettering General Hospital | | United Kingdom | | Local investigator |
| Parizade |  | Raymode | Kettering | | Kettering General Hospital | | United Kingdom | | Local investigator |
| Jan |  | Szafranski | Kettering | | Kettering General Hospital | | United Kingdom | | Local investigator |
| Linda |  | Twohey | Kettering | | Kettering General Hospital | | United Kingdom | | Local investigator |
| Philip |  | Watt | Kettering | | Kettering General Hospital | | United Kingdom | | Local co-ordinator |
| Lucie |  | Weatherall | Kettering | | Kettering General Hospital | | United Kingdom | | Local investigator |
| J |  | Weatherill | Kettering | | Kettering General Hospital | | United Kingdom | | Local investigator |
| Zoe |  | Whitman | Kettering | | Kettering General Hospital | | United Kingdom | | Local investigator |
| Elinor |  | Wighton | Kettering | | Kettering General Hospital | | United Kingdom | | Local investigator |
| Chamika |  | Abayasinghe | London | | King's College Hospital | | United Kingdom | | Local investigator |
| Alexander |  | Chan | London | | King's College Hospital | | United Kingdom | | Local investigator |
| Sharif |  | Darwish | London | | King's College Hospital | | United Kingdom | | Local investigator |
| James |  | Gill | London | | King's College Hospital | | United Kingdom | | Local co-ordinator |
| Emma |  | Glasgow | London | | King's College Hospital | | United Kingdom | | Local investigator |
| Daniel |  | Hadfield | London | | King's College Hospital | | United Kingdom | | Local investigator |
| Clair |  | Harris | London | | King's College Hospital | | United Kingdom | | Local investigator |
| Arun |  | Kochhar | London | | King's College Hospital | | United Kingdom | | Local investigator |
| Clare |  | Mellis | London | | King's College Hospital | | United Kingdom | | Local investigator |
| Andrew |  | Pool | London | | King's College Hospital | | United Kingdom | | Local investigator |
| Paul |  | Riozzi | London | | King's College Hospital | | United Kingdom | | Local investigator |
| Andrew |  | Selman | London | | King's College Hospital | | United Kingdom | | Local investigator |
| Emma-Jane |  | Smith | London | | King's College Hospital | | United Kingdom | | Local investigator |
| Liana |  | Vele | London | | King's College Hospital | | United Kingdom | | Local investigator |
| Yuksel |  | Gercek | Sutton-in-Ashfield | | King's Mill Hospital | | United Kingdom | | Local investigator |
| Kramer |  | Guy | Sutton-in-Ashfield | | King's Mill Hospital | | United Kingdom | | Local investigator |
| Douglas |  | Holden | Sutton-in-Ashfield | | King's Mill Hospital | | United Kingdom | | Local investigator |
| Nicholas |  | Watson | Sutton-in-Ashfield | | King's Mill Hospital | | United Kingdom | | Local co-ordinator |
| Karen |  | Whysall | Sutton-in-Ashfield | | King's Mill Hospital | | United Kingdom | | Local investigator |
| Prematie |  | Andreou | Leicester | | Leicester General Hospital | | United Kingdom | | Local investigator |
| Dawn |  | Hales | Leicester | | Leicester General Hospital | | United Kingdom | | Local investigator |
| Jonathan |  | Thompson | Leicester | | Leicester General Hospital | | United Kingdom | | Local co-ordinator |
| Sarah |  | Bowrey | Leicester | | Leicester Royal Infirmary | | United Kingdom | | Local investigator |
| Shara |  | McDonald | Leicester | | Leicester Royal Infirmary | | United Kingdom | | Local investigator |
| Jonathan |  | Thompson | Leicester | | Leicester Royal Infirmary | | United Kingdom | | Local co-ordinator |
| Jemma |  | Gilmore | London | | Lister Hospital | | United Kingdom | | Local investigator |
| Vicky |  | Hills | London | | Lister Hospital | | United Kingdom | | Local investigator |
| Chan |  | Kelly | London | | Lister Hospital | | United Kingdom | | Local investigator |
| Sinead |  | Kelly | London | | Lister Hospital | | United Kingdom | | Local investigator |
| Geraint |  | Lloyd | London | | Lister Hospital | | United Kingdom | | Local co-ordinator |
| Tom |  | Abbott | London | | London Chest Hospital | | United Kingdom | | Local co-ordinator |
| Lewis |  | Gall | London | | London Chest Hospital | | United Kingdom | | Local investigator |
| Hew |  | Torrance | London | | London Chest Hospital | | United Kingdom | | Local investigator |
| Mark |  | Vivian | London | | London Chest Hospital | | United Kingdom | | Local investigator |
| Emer |  | Berntsen | Maidstone | | Maidstone Hospital | | United Kingdom | | Local investigator |
| Tracey |  | Nolan | Maidstone | | Maidstone Hospital | | United Kingdom | | Local co-ordinator |
| Angus |  | Turner | Maidstone | | Maidstone Hospital | | United Kingdom | | Local investigator |
| Akbar |  | Vohra | Manchester | | Manchester Royal Eye Hospital | | United Kingdom | | Local co-ordinator |
| Andrew |  | Brown | Manchester | | Manchester Royal Infirmary | | United Kingdom | | Local investigator |
| Richard |  | Clark | Manchester | | Manchester Royal Infirmary | | United Kingdom | | Local investigator |
| Elaine |  | Coughlan | Manchester | | Manchester Royal Infirmary | | United Kingdom | | Local investigator |
| Conway |  | Daniel | Manchester | | Manchester Royal Infirmary | | United Kingdom | | Local investigator |
| Chinmay |  | Patvardhan | Manchester | | Manchester Royal Infirmary | | United Kingdom | | Local investigator |
| Rachel |  | Pearson | Manchester | | Manchester Royal Infirmary | | United Kingdom | | Local investigator |
| Sheba |  | Predeep | Manchester | | Manchester Royal Infirmary | | United Kingdom | | Local investigator |
| Hesham |  | Saad | Manchester | | Manchester Royal Infirmary | | United Kingdom | | Local investigator |
| Mohanakrishnan |  | Shanmugam | Manchester | | Manchester Royal Infirmary | | United Kingdom | | Local investigator |
| Simon |  | Varley | Manchester | | Manchester Royal Infirmary | | United Kingdom | | Local investigator |
| Akbar |  | Vohra | Manchester | | Manchester Royal Infirmary | | United Kingdom | | Local co-ordinator |
| Katharine |  | Wylie | Manchester | | Manchester Royal Infirmary | | United Kingdom | | Local investigator |
| Lucy |  | Cooper | Kent | | Medway Maritime Hospital | | United Kingdom | | Local investigator |
| Arystarch |  | Makowski | Kent | | Medway Maritime Hospital | | United Kingdom | | Local co-ordinator |
| Beata |  | Misztal | Kent | | Medway Maritime Hospital | | United Kingdom | | Local co-ordinator |
| Eliza |  | Moldovan | Kent | | Medway Maritime Hospital | | United Kingdom | | Local investigator |
| Claire |  | Pegg | Kent | | Medway Maritime Hospital | | United Kingdom | | Local investigator |
| Andrew |  | Donovan | Taunton | | Musgrove Park Hospital | | United Kingdom | | Local co-ordinator |
| Jayne |  | Foot | Taunton | | Musgrove Park Hospital | | United Kingdom | | Local investigator |
| Simon |  | Large | Taunton | | Musgrove Park Hospital | | United Kingdom | | Local investigator |
| Andrew |  | Claxton | Wolverhampton | | New Cross Hospital | | United Kingdom | | Local co-ordinator |
| Bhagyashree |  | Netke | Wolverhampton | | New Cross Hospital | | United Kingdom | | Local co-ordinator |
| Richard |  | Armstrong | London | | Newham University Hospital | | United Kingdom | | Local investigator |
| Claire |  | Calderwood | London | | Newham University Hospital | | United Kingdom | | Local investigator |
| Andy |  | Kwok | London | | Newham University Hospital | | United Kingdom | | Local investigator |
| Otto |  | Mohr | London | | Newham University Hospital | | United Kingdom | | Local co-ordinator |
| Peter |  | Oyeniyi | London | | Newham University Hospital | | United Kingdom | | Local investigator |
| Lisa |  | Patnaik | London | | Newham University Hospital | | United Kingdom | | Local investigator |
| Benjamin |  | Post | London | | Newham University Hospital | | United Kingdom | | Local investigator |
| Sarah |  | Ali | Norwich | | Norfolk and Norwich University Hospital | | United Kingdom | | Local investigator |
| Homa |  | Arshad | Norwich | | Norfolk and Norwich University Hospital | | United Kingdom | | Local investigator |
| Gerard |  | Baker | Norwich | | Norfolk and Norwich University Hospital | | United Kingdom | | Local co-ordinator |
| Laura |  | Brenner | Norwich | | Norfolk and Norwich University Hospital | | United Kingdom | | Local investigator |
| Maximilian |  | Brincat | Norwich | | Norfolk and Norwich University Hospital | | United Kingdom | | Local investigator |
| Annemarie |  | Brunswicker | Norwich | | Norfolk and Norwich University Hospital | | United Kingdom | | Local investigator |
| Hannah |  | Cox | Norwich | | Norfolk and Norwich University Hospital | | United Kingdom | | Local investigator |
| Octavian | Ionut | Cozar | Norwich | | Norfolk and Norwich University Hospital | | United Kingdom | | Local investigator |
| Alexander |  | Durst | Norwich | | Norfolk and Norwich University Hospital | | United Kingdom | | Local investigator |
| Lior |  | Fengas | Norwich | | Norfolk and Norwich University Hospital | | United Kingdom | | Local investigator |
| Jim |  | Flatt | Norwich | | Norfolk and Norwich University Hospital | | United Kingdom | | Local investigator |
| Georgina |  | Glister | Norwich | | Norfolk and Norwich University Hospital | | United Kingdom | | Local investigator |
| Vishal |  | Narwani | Norwich | | Norfolk and Norwich University Hospital | | United Kingdom | | Local investigator |
| Evangelos |  | Photi | Norwich | | Norfolk and Norwich University Hospital | | United Kingdom | | Local investigator |
| Adeline |  | Rankin | Norwich | | Norfolk and Norwich University Hospital | | United Kingdom | | Local investigator |
| Melissa |  | Rosbergen | Norwich | | Norfolk and Norwich University Hospital | | United Kingdom | | Local investigator |
| Mark |  | Tan | Norwich | | Norfolk and Norwich University Hospital | | United Kingdom | | Local investigator |
| Ceri |  | Beaton | Barnstaple | | North Devon District Hospital | | United Kingdom | | Local co-ordinator |
| Rachel |  | Horn | Barnstaple | | North Devon District Hospital | | United Kingdom | | Local investigator |
| Jane |  | Hunt | Barnstaple | | North Devon District Hospital | | United Kingdom | | Local investigator |
| Guy |  | Rousseau | Barnstaple | | North Devon District Hospital | | United Kingdom | | Local co-ordinator |
| Lucia |  | Stancombe | Barnstaple | | North Devon District Hospital | | United Kingdom | | Local investigator |
| Mohammed |  | Absar | Manchester | | North Manchester General Hospital | | United Kingdom | | Local co-ordinator |
| Joanne |  | Allsop | Manchester | | North Manchester General Hospital | | United Kingdom | | Local investigator |
| Zoe |  | Drinkwater | Manchester | | North Manchester General Hospital | | United Kingdom | | Local investigator |
| Tracey |  | Hodgkiss | Manchester | | North Manchester General Hospital | | United Kingdom | | Local investigator |
| Kirsty |  | Smith | Manchester | | North Manchester General Hospital | | United Kingdom | | Local investigator |
| Jamie |  | Brown | North Shields | | North Tyneside General | | United Kingdom | | Local co-ordinator |
| Sara |  | Pick | North Shields | | North Tyneside General | | United Kingdom | | Local investigator |
| Farhad |  | Alexander-Sefre | Northampton | | Northampton General Hospital | | United Kingdom | | Local investigator |
| Lorraine |  | Campey | Northampton | | Northampton General Hospital | | United Kingdom | | Local investigator |
| Lucy |  | Dudgeon | Northampton | | Northampton General Hospital | | United Kingdom | | Local investigator |
| Kathryn |  | Hall | Northampton | | Northampton General Hospital | | United Kingdom | | Local co-ordinator |
| Rachael |  | Hitchcock | Northampton | | Northampton General Hospital | | United Kingdom | | Local investigator |
| Lynne |  | James | Northampton | | Northampton General Hospital | | United Kingdom | | Local investigator |
| Kate |  | Smith | Northampton | | Northampton General Hospital | | United Kingdom | | Local investigator |
| Ulrika |  | Winstone | Northampton | | Northampton General Hospital | | United Kingdom | | Local investigator |
| Norfaizan |  | Ahmad | Sheffield | | Northern General Hospital | | United Kingdom | | Local investigator |
| Kris |  | Bauchmuller | Sheffield | | Northern General Hospital | | United Kingdom | | Local investigator |
| Jonathan |  | Harrison | Sheffield | | Northern General Hospital | | United Kingdom | | Local investigator |
| Holly |  | Jeffery | Sheffield | | Northern General Hospital | | United Kingdom | | Local investigator |
| Duncan |  | Miller | Sheffield | | Northern General Hospital | | United Kingdom | | Local investigator |
| Angela |  | Pinder | Sheffield | | Northern General Hospital | | United Kingdom | | Local investigator |
| Sailaja |  | Pothuneedi | Sheffield | | Northern General Hospital | | United Kingdom | | Local investigator |
| Jonathan |  | Rosser | Sheffield | | Northern General Hospital | | United Kingdom | | Local investigator |
| Sumayer |  | Sanghera | Sheffield | | Northern General Hospital | | United Kingdom | | Local co-ordinator |
| Diane |  | Swift | Sheffield | | Northern General Hospital | | United Kingdom | | Local investigator |
| Rachel |  | Walker | Sheffield | | Northern General Hospital | | United Kingdom | | Local investigator |
| Delia |  | Bester | Nottingham | | Nottingham University Hospitals | | United Kingdom | | Local investigator |
| Sarah |  | Cavanagh | Nottingham | | Nottingham University Hospitals | | United Kingdom | | Local investigator |
| Heather |  | Cripps | Nottingham | | Nottingham University Hospitals | | United Kingdom | | Local investigator |
| Harvey |  | Daniel | Nottingham | | Nottingham University Hospitals | | United Kingdom | | Local co-ordinator |
| Julie |  | Lynch | Nottingham | | Nottingham University Hospitals | | United Kingdom | | Local investigator |
| Alison |  | Paton | Nottingham | | Nottingham University Hospitals | | United Kingdom | | Local investigator |
| Shirley |  | Pyke | Nottingham | | Nottingham University Hospitals | | United Kingdom | | Local investigator |
| John |  | Scholefield | Nottingham | | Nottingham University Hospitals | | United Kingdom | | Local co-ordinator |
| Helen |  | Whitworth | Nottingham | | Nottingham University Hospitals | | United Kingdom | | Local investigator |
| Fiona |  | Bottrill | Cambridge | | Papworth Hospital | | United Kingdom | | Local investigator |
| Ganesh |  | Ramalingam | Cambridge | | Papworth Hospital | | United Kingdom | | Local investigator |
| Stephen |  | Webb | Cambridge | | Papworth Hospital | | United Kingdom | | Local co-ordinator |
| Nik |  | Akerman | Wakefield | | Pinderfields Hospital | | United Kingdom | | Local investigator |
| Philip |  | Antill | Wakefield | | Pinderfields Hospital | | United Kingdom | | Local investigator |
| Lynsey |  | Bourner | Wakefield | | Pinderfields Hospital | | United Kingdom | | Local investigator |
| Sarah |  | Buckley | Wakefield | | Pinderfields Hospital | | United Kingdom | | Local investigator |
| Gail |  | Castle | Wakefield | | Pinderfields Hospital | | United Kingdom | | Local investigator |
| Rob |  | Charles | Wakefield | | Pinderfields Hospital | | United Kingdom | | Local investigator |
| Christopher |  | Eggleston | Wakefield | | Pinderfields Hospital | | United Kingdom | | Local investigator |
| Rebecca |  | Foster | Wakefield | | Pinderfields Hospital | | United Kingdom | | Local investigator |
| Satwant |  | Gill | Wakefield | | Pinderfields Hospital | | United Kingdom | | Local investigator |
| Kate |  | Lindley | Wakefield | | Pinderfields Hospital | | United Kingdom | | Local investigator |
| Mohamed |  | Lklouk | Wakefield | | Pinderfields Hospital | | United Kingdom | | Local investigator |
| Tracey |  | Lowery | Wakefield | | Pinderfields Hospital | | United Kingdom | | Local investigator |
| Oliver |  | Martin | Wakefield | | Pinderfields Hospital | | United Kingdom | | Local investigator |
| David |  | Milne | Wakefield | | Pinderfields Hospital | | United Kingdom | | Local investigator |
| Patrick |  | O'Connor | Wakefield | | Pinderfields Hospital | | United Kingdom | | Local investigator |
| Andrew |  | Ratcliffe | Wakefield | | Pinderfields Hospital | | United Kingdom | | Local investigator |
| Alastair |  | Rose | Wakefield | | Pinderfields Hospital | | United Kingdom | | Local co-ordinator |
| Karen |  | Simeson | Wakefield | | Pinderfields Hospital | | United Kingdom | | Local investigator |
| Annie |  | Smith | Wakefield | | Pinderfields Hospital | | United Kingdom | | Local investigator |
| Sandeep |  | Varma | Wakefield | | Pinderfields Hospital | | United Kingdom | | Local co-ordinator |
| Jackie |  | Ward | Wakefield | | Pinderfields Hospital | | United Kingdom | | Local investigator |
| Karen |  | Simeson | Pontefract | | Pontefract Hospital | | United Kingdom | | Local co-ordinator |
| Helena |  | Barcraft-Barnes | Poole | | Poole Hospital | | United Kingdom | | Local investigator |
| Julie |  | Camsooksai | Poole | | Poole Hospital | | United Kingdom | | Local co-ordinator |
| Carolyn |  | Colvin | Poole | | Poole Hospital | | United Kingdom | | Local investigator |
| Henrik |  | Reschreiter | Poole | | Poole Hospital | | United Kingdom | | Local co-ordinator |
| Lee |  | Tbaily | Poole | | Poole Hospital | | United Kingdom | | Local investigator |
| Nicola |  | Venner | Poole | | Poole Hospital | | United Kingdom | | Local investigator |
| Caroline |  | Hamilton | Merthyr Tydfil | | Prince Charles Hospital | | United Kingdom | | Local investigator |
| Lewis |  | Kelly | Merthyr Tydfil | | Prince Charles Hospital | | United Kingdom | | Local investigator |
| Piroska |  | Toth-Tarsoly | Merthyr Tydfil | | Prince Charles Hospital | | United Kingdom | | Local co-ordinator |
| Kerry |  | Dodsworth | Portsmouth | | Queen Alexandra Hospital | | United Kingdom | | Local investigator |
| Denise |  | Foord | Portsmouth | | Queen Alexandra Hospital | | United Kingdom | | Local investigator |
| Paul |  | Gordon | Portsmouth | | Queen Alexandra Hospital | | United Kingdom | | Local investigator |
| Elizabeth |  | Hawes | Portsmouth | | Queen Alexandra Hospital | | United Kingdom | | Local investigator |
| Nikki |  | Lamb | Portsmouth | | Queen Alexandra Hospital | | United Kingdom | | Local investigator |
| Johanna |  | Mouland | Portsmouth | | Queen Alexandra Hospital | | United Kingdom | | Local investigator |
| Jeremy |  | Nightingale | Portsmouth | | Queen Alexandra Hospital | | United Kingdom | | Local co-ordinator |
| Steve |  | Rose | Portsmouth | | Queen Alexandra Hospital | | United Kingdom | | Local investigator |
| Joe |  | Schrieber | Portsmouth | | Queen Alexandra Hospital | | United Kingdom | | Local investigator |
| Khalid |  | Al 'Amri | Birmingham | | Queen Elizabeth Hospital Birmingham | | United Kingdom | | Local investigator |
| Hafiz |  | Aladin | Birmingham | | Queen Elizabeth Hospital Birmingham | | United Kingdom | | Local investigator |
| Mohammed | Asif | Arshad | Birmingham | | Queen Elizabeth Hospital Birmingham | | United Kingdom | | Local investigator |
| James |  | Barraclough | Birmingham | | Queen Elizabeth Hospital Birmingham | | United Kingdom | | Local investigator |
| Conor |  | Bentley | Birmingham | | Queen Elizabeth Hospital Birmingham | | United Kingdom | | Local investigator |
| Colin |  | Bergin | Birmingham | | Queen Elizabeth Hospital Birmingham | | United Kingdom | | Local investigator |
| Ronald |  | Carrera | Birmingham | | Queen Elizabeth Hospital Birmingham | | United Kingdom | | Local investigator |
| Aisling |  | Clarkson | Birmingham | | Queen Elizabeth Hospital Birmingham | | United Kingdom | | Local investigator |
| Michelle |  | Collins | Birmingham | | Queen Elizabeth Hospital Birmingham | | United Kingdom | | Local investigator |
| Lauren |  | Cooper | Birmingham | | Queen Elizabeth Hospital Birmingham | | United Kingdom | | Local investigator |
| Samuel |  | Denham | Birmingham | | Queen Elizabeth Hospital Birmingham | | United Kingdom | | Local investigator |
| Ewen |  | Griffiths | Birmingham | | Queen Elizabeth Hospital Birmingham | | United Kingdom | | Local investigator |
| Peter |  | Ip | Birmingham | | Queen Elizabeth Hospital Birmingham | | United Kingdom | | Local investigator |
| Somasundaram |  | Jeyanthan | Birmingham | | Queen Elizabeth Hospital Birmingham | | United Kingdom | | Local investigator |
| Kavita |  | Joory | Birmingham | | Queen Elizabeth Hospital Birmingham | | United Kingdom | | Local investigator |
| Satwant |  | Kaur | Birmingham | | Queen Elizabeth Hospital Birmingham | | United Kingdom | | Local investigator |
| Paul |  | Marriott | Birmingham | | Queen Elizabeth Hospital Birmingham | | United Kingdom | | Local investigator |
| Natalie |  | Mitchell | Birmingham | | Queen Elizabeth Hospital Birmingham | | United Kingdom | | Local investigator |
| Sukumar |  | Nagaiah | Birmingham | | Queen Elizabeth Hospital Birmingham | | United Kingdom | | Local investigator |
| Annette |  | Nilsson | Birmingham | | Queen Elizabeth Hospital Birmingham | | United Kingdom | | Local investigator |
| Nilesh |  | Parekh | Birmingham | | Queen Elizabeth Hospital Birmingham | | United Kingdom | | Local co-ordinator |
| Martin |  | Pope | Birmingham | | Queen Elizabeth Hospital Birmingham | | United Kingdom | | Local investigator |
| Joseph |  | Seager | Birmingham | | Queen Elizabeth Hospital Birmingham | | United Kingdom | | Local investigator |
| Hosam |  | Serag | Birmingham | | Queen Elizabeth Hospital Birmingham | | United Kingdom | | Local investigator |
| Alifia |  | Tameem | Birmingham | | Queen Elizabeth Hospital Birmingham | | United Kingdom | | Local investigator |
| Anna |  | Thomas | Birmingham | | Queen Elizabeth Hospital Birmingham | | United Kingdom | | Local investigator |
| Joanne |  | Thunder | Birmingham | | Queen Elizabeth Hospital Birmingham | | United Kingdom | | Local investigator |
| Andrew |  | Torrance | Birmingham | | Queen Elizabeth Hospital Birmingham | | United Kingdom | | Local investigator |
| Ravinder |  | Vohra | Birmingham | | Queen Elizabeth Hospital Birmingham | | United Kingdom | | Local investigator |
| Arlo |  | whitehouse | Birmingham | | Queen Elizabeth Hospital Birmingham | | United Kingdom | | Local investigator |
| Tony |  | Wong | Birmingham | | Queen Elizabeth Hospital Birmingham | | United Kingdom | | Local investigator |
| Mark |  | Blunt | King's Lynn | | Queen Elizabeth Hospital Kings Lynn | | United Kingdom | | Local co-ordinator |
| Kate |  | Wong | King's Lynn | | Queen Elizabeth Hospital Kings Lynn | | United Kingdom | | Local investigator |
| Julian |  | Giles | East Grinstead | | Queen Victoria Hospital | | United Kingdom | | Local co-ordinator |
| Isabelle |  | Reed | East Grinstead | | Queen Victoria Hospital | | United Kingdom | | Local co-ordinator |
| Debbie |  | Weller | East Grinstead | | Queen Victoria Hospital | | United Kingdom | | Local investigator |
| Gillian |  | Bell | Romford | | Queens Hospital | | United Kingdom | | Local investigator |
| Julie |  | Birch | Romford | | Queens Hospital | | United Kingdom | | Local investigator |
| Rose |  | Damant | Romford | | Queens Hospital | | United Kingdom | | Local investigator |
| Jane |  | Maiden | Romford | | Queens Hospital | | United Kingdom | | Local investigator |
| Clare |  | Mewies | Romford | | Queens Hospital | | United Kingdom | | Local co-ordinator |
| Claire |  | Prince | Romford | | Queens Hospital | | United Kingdom | | Local investigator |
| Jane |  | Radford | Romford | | Queens Hospital | | United Kingdom | | Local investigator |
| Birender |  | Balain | Oswestry | | Robert Jones and Agnes Hunt Orthopaedic Hospital | | United Kingdom | | Local investigator |
| Robin |  | Banerjee | Oswestry | | Robert Jones and Agnes Hunt Orthopaedic Hospital | | United Kingdom | | Local investigator |
| Andrew |  | Barnett | Oswestry | | Robert Jones and Agnes Hunt Orthopaedic Hospital | | United Kingdom | | Local investigator |
| Ben |  | Burston | Oswestry | | Robert Jones and Agnes Hunt Orthopaedic Hospital | | United Kingdom | | Local investigator |
| Kirsty |  | Davies | Oswestry | | Robert Jones and Agnes Hunt Orthopaedic Hospital | | United Kingdom | | Local investigator |
| Jayne |  | Edwards | Oswestry | | Robert Jones and Agnes Hunt Orthopaedic Hospital | | United Kingdom | | Local investigator |
| Chris |  | Evans | Oswestry | | Robert Jones and Agnes Hunt Orthopaedic Hospital | | United Kingdom | | Local investigator |
| David |  | Ford | Oswestry | | Robert Jones and Agnes Hunt Orthopaedic Hospital | | United Kingdom | | Local investigator |
| Pete |  | Gallacher | Oswestry | | Robert Jones and Agnes Hunt Orthopaedic Hospital | | United Kingdom | | Local investigator |
| Simon |  | Hill | Oswestry | | Robert Jones and Agnes Hunt Orthopaedic Hospital | | United Kingdom | | Local investigator |
| David |  | Jaffray | Oswestry | | Robert Jones and Agnes Hunt Orthopaedic Hospital | | United Kingdom | | Local investigator |
| Sudheer |  | Karlakki | Oswestry | | Robert Jones and Agnes Hunt Orthopaedic Hospital | | United Kingdom | | Local co-ordinator |
| Cormac |  | Kelly | Oswestry | | Robert Jones and Agnes Hunt Orthopaedic Hospital | | United Kingdom | | Local investigator |
| Julia |  | Kennedy | Oswestry | | Robert Jones and Agnes Hunt Orthopaedic Hospital | | United Kingdom | | Local investigator |
| Nigel |  | Kiely | Oswestry | | Robert Jones and Agnes Hunt Orthopaedic Hospital | | United Kingdom | | Local investigator |
| Simon |  | Lewthwaite | Oswestry | | Robert Jones and Agnes Hunt Orthopaedic Hospital | | United Kingdom | | Local investigator |
| Chris |  | Marquis | Oswestry | | Robert Jones and Agnes Hunt Orthopaedic Hospital | | United Kingdom | | Local investigator |
| Matthew |  | Ockendon | Oswestry | | Robert Jones and Agnes Hunt Orthopaedic Hospital | | United Kingdom | | Local investigator |
| Stephen |  | Phillips | Oswestry | | Robert Jones and Agnes Hunt Orthopaedic Hospital | | United Kingdom | | Local investigator |
| Simon |  | Pickard | Oswestry | | Robert Jones and Agnes Hunt Orthopaedic Hospital | | United Kingdom | | Local investigator |
| James |  | Richardson | Oswestry | | Robert Jones and Agnes Hunt Orthopaedic Hospital | | United Kingdom | | Local investigator |
| Richard |  | Roach | Oswestry | | Robert Jones and Agnes Hunt Orthopaedic Hospital | | United Kingdom | | Local investigator |
| Tony |  | Smith | Oswestry | | Robert Jones and Agnes Hunt Orthopaedic Hospital | | United Kingdom | | Local investigator |
| Richard |  | Spencer-Jones | Oswestry | | Robert Jones and Agnes Hunt Orthopaedic Hospital | | United Kingdom | | Local investigator |
| Niall |  | Steele | Oswestry | | Robert Jones and Agnes Hunt Orthopaedic Hospital | | United Kingdom | | Local investigator |
| Julie |  | Steen | Oswestry | | Robert Jones and Agnes Hunt Orthopaedic Hospital | | United Kingdom | | Local investigator |
| Marck |  | Van Liefland | Oswestry | | Robert Jones and Agnes Hunt Orthopaedic Hospital | | United Kingdom | | Local investigator |
| Steve |  | White | Oswestry | | Robert Jones and Agnes Hunt Orthopaedic Hospital | | United Kingdom | | Local investigator |
| Matthew |  | Faulds | Rotherham | | Rotherham Hospital | | United Kingdom | | Local investigator |
| Meredyth |  | Harris | Rotherham | | Rotherham Hospital | | United Kingdom | | Local investigator |
| Carrie |  | Kelly | Rotherham | | Rotherham Hospital | | United Kingdom | | Local co-ordinator |
| Scott |  | Nicol | Rotherham | | Rotherham Hospital | | United Kingdom | | Local investigator |
| Sally | Anne | Pearson | Rotherham | | Rotherham Hospital | | United Kingdom | | Local investigator |
| Srikanth |  | Chukkambotla | Blackburn | | Royal Blackburn Hospital | | United Kingdom | | Local co-ordinator |
| Alyson |  | Andrew | Truro | | Royal Cornwall Hospital | | United Kingdom | | Local investigator |
| Elizabeth |  | Attrill | Truro | | Royal Cornwall Hospital | | United Kingdom | | Local investigator |
| Graham |  | Campbell | Truro | | Royal Cornwall Hospital | | United Kingdom | | Local investigator |
| Amanda |  | Datson | Truro | | Royal Cornwall Hospital | | United Kingdom | | Local investigator |
| Anna |  | Fouracres | Truro | | Royal Cornwall Hospital | | United Kingdom | | Local investigator |
| Juan |  | Graterol | Truro | | Royal Cornwall Hospital | | United Kingdom | | Local investigator |
| Lynne |  | Graves | Truro | | Royal Cornwall Hospital | | United Kingdom | | Local investigator |
| Bosun |  | Hong | Truro | | Royal Cornwall Hospital | | United Kingdom | | Local investigator |
| Alexander |  | Ishimaru | Truro | | Royal Cornwall Hospital | | United Kingdom | | Local investigator |
| Arvind |  | Karthikeyan | Truro | | Royal Cornwall Hospital | | United Kingdom | | Local investigator |
| Helen |  | King | Truro | | Royal Cornwall Hospital | | United Kingdom | | Local investigator |
| Tom |  | Lawson | Truro | | Royal Cornwall Hospital | | United Kingdom | | Local co-ordinator |
| Gregory |  | Lee | Truro | | Royal Cornwall Hospital | | United Kingdom | | Local investigator |
| Saoirse |  | Lyons | Truro | | Royal Cornwall Hospital | | United Kingdom | | Local investigator |
| Andrew |  | Macalister Hall | Truro | | Royal Cornwall Hospital | | United Kingdom | | Local investigator |
| Sophie |  | Mathoulin | Truro | | Royal Cornwall Hospital | | United Kingdom | | Local investigator |
| Eilidh |  | Mcintyre | Truro | | Royal Cornwall Hospital | | United Kingdom | | Local investigator |
| Danny |  | Mclaughlin | Truro | | Royal Cornwall Hospital | | United Kingdom | | Local investigator |
| Kathleen |  | Mulcahy | Truro | | Royal Cornwall Hospital | | United Kingdom | | Local investigator |
| Anna |  | Ratcliffe | Truro | | Royal Cornwall Hospital | | United Kingdom | | Local investigator |
| James |  | Robbins | Truro | | Royal Cornwall Hospital | | United Kingdom | | Local investigator |
| Weilin |  | Sung | Truro | | Royal Cornwall Hospital | | United Kingdom | | Local investigator |
| Adeoluwa |  | Tayo | Truro | | Royal Cornwall Hospital | | United Kingdom | | Local investigator |
| Lisa |  | Trembath | Truro | | Royal Cornwall Hospital | | United Kingdom | | Local investigator |
| Suneetha |  | Venugopal | Truro | | Royal Cornwall Hospital | | United Kingdom | | Local investigator |
| Robert |  | Walker | Truro | | Royal Cornwall Hospital | | United Kingdom | | Local investigator |
| Geoffrey |  | Wigmore | Truro | | Royal Cornwall Hospital | | United Kingdom | | Local investigator |
| Catherine |  | Boereboom | Derby | | Royal Derby Hospital | | United Kingdom | | Local investigator |
| Charlotte |  | Downes | Derby | | Royal Derby Hospital | | United Kingdom | | Local investigator |
| Ryan |  | Humphries | Derby | | Royal Derby Hospital | | United Kingdom | | Local investigator |
| Susan |  | Melbourne | Derby | | Royal Derby Hospital | | United Kingdom | | Local investigator |
| Coral |  | Smith | Derby | | Royal Derby Hospital | | United Kingdom | | Local investigator |
| Samson |  | Tou | Derby | | Royal Derby Hospital | | United Kingdom | | Local co-ordinator |
| Shafa |  | Ullah | Derby | | Royal Derby Hospital | | United Kingdom | | Local investigator |
| Nick |  | Batchelor | Exeter | | Royal Devon and Exeter Hospital | | United Kingdom | | Local investigator |
| Leigh |  | Boxall | Exeter | | Royal Devon and Exeter Hospital | | United Kingdom | | Local investigator |
| Rupert |  | Broomby | Exeter | | Royal Devon and Exeter Hospital | | United Kingdom | | Local investigator |
| Tariq |  | Deen | Exeter | | Royal Devon and Exeter Hospital | | United Kingdom | | Local investigator |
| Alistair |  | Hellewell | Exeter | | Royal Devon and Exeter Hospital | | United Kingdom | | Local investigator |
| Laurence |  | Helliwell | Exeter | | Royal Devon and Exeter Hospital | | United Kingdom | | Local investigator |
| Melanie |  | Hutchings | Exeter | | Royal Devon and Exeter Hospital | | United Kingdom | | Local investigator |
| David |  | Hutchins | Exeter | | Royal Devon and Exeter Hospital | | United Kingdom | | Local investigator |
| Samantha |  | Keenan | Exeter | | Royal Devon and Exeter Hospital | | United Kingdom | | Local investigator |
| Donna |  | Mackie | Exeter | | Royal Devon and Exeter Hospital | | United Kingdom | | Local investigator |
| Alison |  | Potter | Exeter | | Royal Devon and Exeter Hospital | | United Kingdom | | Local co-ordinator |
| Frances |  | Smith | Exeter | | Royal Devon and Exeter Hospital | | United Kingdom | | Local investigator |
| Lucy |  | Stone | Exeter | | Royal Devon and Exeter Hospital | | United Kingdom | | Local investigator |
| Kevin |  | Thorpe | Exeter | | Royal Devon and Exeter Hospital | | United Kingdom | | Local investigator |
| Richard |  | Wassall | Exeter | | Royal Devon and Exeter Hospital | | United Kingdom | | Local investigator |
| Andrew |  | Woodgate | Exeter | | Royal Devon and Exeter Hospital | | United Kingdom | | Local investigator |
| Shelley |  | Baillie | London | | Royal Free Hospital | | United Kingdom | | Local investigator |
| Tara |  | Campbell | London | | Royal Free Hospital | | United Kingdom | | Local investigator |
| Sarah |  | James | London | | Royal Free Hospital | | United Kingdom | | Local co-ordinator |
| Chris |  | King | London | | Royal Free Hospital | | United Kingdom | | Local investigator |
| Daniela |  | Marques de Araujo | London | | Royal Free Hospital | | United Kingdom | | Local investigator |
| Daniel |  | Martin | London | | Royal Free Hospital | | United Kingdom | | Local investigator |
| Clare |  | Morkane | London | | Royal Free Hospital | | United Kingdom | | Local investigator |
| Julia |  | Neely | London | | Royal Free Hospital | | United Kingdom | | Local investigator |
| Rajkumar |  | Rajendram | London | | Royal Free Hospital | | United Kingdom | | Local investigator |
| Megan |  | Burton | Llantrisant | | Royal Glamorgan Hospital | | United Kingdom | | Local investigator |
| Kathryn |  | James | Llantrisant | | Royal Glamorgan Hospital | | United Kingdom | | Local investigator |
| Edward |  | Keevil | Llantrisant | | Royal Glamorgan Hospital | | United Kingdom | | Local investigator |
| Orsolya |  | Minik | Llantrisant | | Royal Glamorgan Hospital | | United Kingdom | | Local investigator |
| Jenna |  | Morgan | Llantrisant | | Royal Glamorgan Hospital | | United Kingdom | | Local investigator |
| Anna |  | Musgrave | Llantrisant | | Royal Glamorgan Hospital | | United Kingdom | | Local investigator |
| Harish |  | Rajanna | Llantrisant | | Royal Glamorgan Hospital | | United Kingdom | | Local investigator |
| Tracey |  | Roberts | Llantrisant | | Royal Glamorgan Hospital | | United Kingdom | | Local investigator |
| Tamas |  | Szakmany | Llantrisant | | Royal Glamorgan Hospital | | United Kingdom | | Local co-ordinator |
| Michael |  | Adamson | Newport | | Royal Gwent Hospital | | United Kingdom | | Local co-ordinator |
| Sandra |  | Jumbe | Newport | | Royal Gwent Hospital | | United Kingdom | | Local investigator |
| Jennie |  | Kendall | Newport | | Royal Gwent Hospital | | United Kingdom | | Local investigator |
| Mohan | Babu | Muthuswamy | Newport | | Royal Gwent Hospital | | United Kingdom | | Local co-ordinator |
| Charlotte |  | Anderson | Sheffield | | Royal Hallamshire Hospital | | United Kingdom | | Local investigator |
| Andrew |  | Cruikshanks | Sheffield | | Royal Hallamshire Hospital | | United Kingdom | | Local investigator |
| Sailaja |  | Pothuneedi | Sheffield | | Royal Hallamshire Hospital | | United Kingdom | | Local investigator |
| Rachel |  | Walker | Sheffield | | Royal Hallamshire Hospital | | United Kingdom | | Local investigator |
| Ian |  | Wrench | Sheffield | | Royal Hallamshire Hospital | | United Kingdom | | Local co-ordinator |
| Lisa |  | Zeidan | Sheffield | | Royal Hallamshire Hospital | | United Kingdom | | Local investigator |
| Diane |  | Ardern | Winchester | | Royal Hampshire County Hospital | | United Kingdom | | Local investigator |
| Benjamin |  | Harris | Winchester | | Royal Hampshire County Hospital | | United Kingdom | | Local investigator |
| Johanna |  | Hellstrom | Winchester | | Royal Hampshire County Hospital | | United Kingdom | | Local investigator |
| Jane |  | Martin | Winchester | | Royal Hampshire County Hospital | | United Kingdom | | Local investigator |
| Richard |  | Thomas | Winchester | | Royal Hampshire County Hospital | | United Kingdom | | Local co-ordinator |
| Nimu |  | Varsani | Winchester | | Royal Hampshire County Hospital | | United Kingdom | | Local investigator |
| Caroline |  | Wrey Brown | Winchester | | Royal Hampshire County Hospital | | United Kingdom | | Local investigator |
| Philip |  | Docherty | Edinburgh | | Royal Infirmary Edinburgh | | United Kingdom | | Local co-ordinator |
| Michael |  | Gillies | Edinburgh | | Royal Infirmary Edinburgh | | United Kingdom | | Local co-ordinator |
| Euan |  | McGregor | Edinburgh | | Royal Infirmary Edinburgh | | United Kingdom | | Local investigator |
| Helen |  | Usher | Edinburgh | | Royal Infirmary Edinburgh | | United Kingdom | | Local investigator |
| Jayne |  | Craig | Lancaster | | Royal Lancaster Infirmary | | United Kingdom | | Local investigator |
| Andrew |  | Smith | Lancaster | | Royal Lancaster Infirmary | | United Kingdom | | Local co-ordinator |
| Tahania |  | Ahmad | London | | Royal London Hospital | | United Kingdom | | Local investigator |
| Phoebe |  | Bodger | London | | Royal London Hospital | | United Kingdom | | Local investigator |
| Thais |  | Creary | London | | Royal London Hospital | | United Kingdom | | Local investigator |
| Kirsty |  | Everingham | London | | Royal London Hospital | | United Kingdom | | Local investigator |
| Alexander |  | Fowler | London | | Royal London Hospital | | United Kingdom | | Local investigator |
| Russ |  | Hewson | London | | Royal London Hospital | | United Kingdom | | Local investigator |
| Eke |  | Ijuo | London | | Royal London Hospital | | United Kingdom | | Local investigator |
| Marta |  | Januszewska | London | | Royal London Hospital | | United Kingdom | | Local investigator |
| Timothy |  | Jones | London | | Royal London Hospital | | United Kingdom | | Local investigator |
| Ilya |  | Kantsedikas | London | | Royal London Hospital | | United Kingdom | | Local investigator |
| Sumitra |  | Lahiri | London | | Royal London Hospital | | United Kingdom | | Local investigator |
| Aaron | Lawson | McLean | London | | Royal London Hospital | | United Kingdom | | Local investigator |
| Edyta |  | Niebrzegowska | London | | Royal London Hospital | | United Kingdom | | Local investigator |
| Mandeep |  | Phull | London | | Royal London Hospital | | United Kingdom | | Local co-ordinator |
| Difei |  | Wang | London | | Royal London Hospital | | United Kingdom | | Local investigator |
| Nadine |  | Wickboldt | London | | Royal London Hospital | | United Kingdom | | Local investigator |
| Jacqueline |  | Baldwin | Preston | | Royal Preston Hospital | | United Kingdom | | Local investigator |
| Donna |  | Doyle | Preston | | Royal Preston Hospital | | United Kingdom | | Local investigator |
| Sean |  | Mcmullan | Preston | | Royal Preston Hospital | | United Kingdom | | Local investigator |
| Michelle |  | Oladapo | Preston | | Royal Preston Hospital | | United Kingdom | | Local investigator |
| Thomas |  | Owen | Preston | | Royal Preston Hospital | | United Kingdom | | Local co-ordinator |
| Shiva |  | Tripathi | Preston | | Royal Preston Hospital | | United Kingdom | | Local co-ordinator |
| Alexandra |  | Williams | Preston | | Royal Preston Hospital | | United Kingdom | | Local investigator |
| Hull |  | Daniel | Guildford | | Royal Surrey County Hospital | | United Kingdom | | Local investigator |
| Peter |  | Gregory | Guildford | | Royal Surrey County Hospital | | United Kingdom | | Local investigator |
| Tauqeer |  | Husain | Guildford | | Royal Surrey County Hospital | | United Kingdom | | Local investigator |
| Justin |  | Kirk-Bayley | Guildford | | Royal Surrey County Hospital | | United Kingdom | | Local co-ordinator |
| Edward |  | Mathers | Guildford | | Royal Surrey County Hospital | | United Kingdom | | Local investigator |
| Laura |  | Montague | Guildford | | Royal Surrey County Hospital | | United Kingdom | | Local investigator |
| Stuart |  | White | Brighton | | Royal Sussex County Hospital | | United Kingdom | | Local co-ordinator |
| Joanne |  | Avis | Bath | | Royal United Hospital Bath | | United Kingdom | | Local investigator |
| Tim |  | Cook | Bath | | Royal United Hospital Bath | | United Kingdom | | Local co-ordinator |
| Lola |  | Dali-Kemmery | Bath | | Royal United Hospital Bath | | United Kingdom | | Local investigator |
| Ian |  | Kerslake | Bath | | Royal United Hospital Bath | | United Kingdom | | Local co-ordinator |
| Victoria |  | Lambourne | Bath | | Royal United Hospital Bath | | United Kingdom | | Local investigator |
| Annabel |  | Pearson | Bath | | Royal United Hospital Bath | | United Kingdom | | Local investigator |
| Christine |  | Boyd | Newcastle upon Tyne | | Royal Victoria Infirmary | | United Kingdom | | Local investigator |
| Mark |  | Callaghan | Newcastle upon Tyne | | Royal Victoria Infirmary | | United Kingdom | | Local investigator |
| Cathy |  | Lawson | Newcastle upon Tyne | | Royal Victoria Infirmary | | United Kingdom | | Local investigator |
| Roopa |  | McCrossan | Newcastle upon Tyne | | Royal Victoria Infirmary | | United Kingdom | | Local investigator |
| Vanessa |  | Nesbitt | Newcastle upon Tyne | | Royal Victoria Infirmary | | United Kingdom | | Local investigator |
| Laura |  | O'connor | Newcastle upon Tyne | | Royal Victoria Infirmary | | United Kingdom | | Local investigator |
| Julia |  | Scott | Newcastle upon Tyne | | Royal Victoria Infirmary | | United Kingdom | | Local investigator |
| Rhona |  | Sinclair | Newcastle upon Tyne | | Royal Victoria Infirmary | | United Kingdom | | Local co-ordinator |
| Nahla |  | Farid | Dudley | | Russells Hall Hospital | | United Kingdom | | Local co-ordinator |
| Ciro |  | Morgese | Dudley | | Russells Hall Hospital | | United Kingdom | | Local investigator |
| Kailash |  | Bhatia | London | | Saint Mary's Hospital | | United Kingdom | | Local investigator |
| Swati |  | Karmarkar | London | | Saint Mary's Hospital | | United Kingdom | | Local investigator |
| Akbar |  | Vohra | London | | Saint Mary's Hospital | | United Kingdom | | Local co-ordinator |
| Jamil |  | Ahmed | Salisbury | | Salisbury District Hospital | | United Kingdom | | Local co-ordinator |
| Graham |  | Branagan | Salisbury | | Salisbury District Hospital | | United Kingdom | | Local co-ordinator |
| Monica |  | Hutton | Salisbury | | Salisbury District Hospital | | United Kingdom | | Local investigator |
| Andrew |  | Swain | Salisbury | | Salisbury District Hospital | | United Kingdom | | Local investigator |
| Jamie |  | Brookes | Birmingham | | Sandwell & West Birmingham Hospitals NHS Trust | | United Kingdom | | Local investigator |
| Jonathan |  | Cornell | Birmingham | | Sandwell & West Birmingham Hospitals NHS Trust | | United Kingdom | | Local investigator |
| Rachael |  | Dolan | Birmingham | | Sandwell & West Birmingham Hospitals NHS Trust | | United Kingdom | | Local investigator |
| Jonathan |  | Hulme | Birmingham | | Sandwell & West Birmingham Hospitals NHS Trust | | United Kingdom | | Local co-ordinator |
| Amanda |  | Jansen van Vuuren | Birmingham | | Sandwell & West Birmingham Hospitals NHS Trust | | United Kingdom | | Local investigator |
| Tom |  | Jowitt | Birmingham | | Sandwell & West Birmingham Hospitals NHS Trust | | United Kingdom | | Local investigator |
| Gunasheela |  | Kalashetty | Birmingham | | Sandwell & West Birmingham Hospitals NHS Trust | | United Kingdom | | Local investigator |
| Fran |  | Lloyd | Birmingham | | Sandwell & West Birmingham Hospitals NHS Trust | | United Kingdom | | Local investigator |
| Kiran |  | Patel | Birmingham | | Sandwell & West Birmingham Hospitals NHS Trust | | United Kingdom | | Local investigator |
| Nicholas |  | Sherwood | Birmingham | | Sandwell & West Birmingham Hospitals NHS Trust | | United Kingdom | | Local investigator |
| Lynne |  | Brown | Scarborough | | Scarborough Hospital | | United Kingdom | | Local investigator |
| Ben |  | Chandler | Scarborough | | Scarborough Hospital | | United Kingdom | | Local co-ordinator |
| Kerry |  | Deighton | Scarborough | | Scarborough Hospital | | United Kingdom | | Local investigator |
| Temlett |  | Emma | Scarborough | | Scarborough Hospital | | United Kingdom | | Local investigator |
| Kirsty |  | Haunch | Scarborough | | Scarborough Hospital | | United Kingdom | | Local investigator |
| Michelle |  | Cheeseman | Scunthorpe | | Scunthorpe General Hospital | | United Kingdom | | Local investigator |
| Kathy |  | Dent | Scunthorpe | | Scunthorpe General Hospital | | United Kingdom | | Local investigator |
| Sanjeev |  | Garg | Scunthorpe | | Scunthorpe General Hospital | | United Kingdom | | Local investigator |
| Carol |  | Gray | Scunthorpe | | Scunthorpe General Hospital | | United Kingdom | | Local co-ordinator |
| Marion |  | Hood | Scunthorpe | | Scunthorpe General Hospital | | United Kingdom | | Local investigator |
| Dawn |  | Jones | Scunthorpe | | Scunthorpe General Hospital | | United Kingdom | | Local investigator |
| Joanne |  | Juj | Scunthorpe | | Scunthorpe General Hospital | | United Kingdom | | Local investigator |
| Atideb |  | Mitra | Scunthorpe | | Scunthorpe General Hospital | | United Kingdom | | Local co-ordinator |
| Roshan |  | Rao | Scunthorpe | | Scunthorpe General Hospital | | United Kingdom | | Local investigator |
| Tara |  | Walker | Scunthorpe | | Scunthorpe General Hospital | | United Kingdom | | Local investigator |
| Mashel |  | Al Anizi | Westcliff-on-Sea | | Southend University Hospital | | United Kingdom | | Local investigator |
| Clarissa |  | Cheah | Westcliff-on-Sea | | Southend University Hospital | | United Kingdom | | Local investigator |
| Yushio |  | Cheing | Westcliff-on-Sea | | Southend University Hospital | | United Kingdom | | Local investigator |
| Francisco |  | Coutinho | Westcliff-on-Sea | | Southend University Hospital | | United Kingdom | | Local investigator |
| Prisca |  | Gondo | Westcliff-on-Sea | | Southend University Hospital | | United Kingdom | | Local investigator |
| Bernard |  | Hadebe | Westcliff-on-Sea | | Southend University Hospital | | United Kingdom | | Local investigator |
| Mazvangu |  | Onie Hove | Westcliff-on-Sea | | Southend University Hospital | | United Kingdom | | Local investigator |
| Ahamed |  | khader | Westcliff-on-Sea | | Southend University Hospital | | United Kingdom | | Local co-ordinator |
| Bobby |  | Krishnachetty | Westcliff-on-Sea | | Southend University Hospital | | United Kingdom | | Local co-ordinator |
| Karen |  | Rhodes | Westcliff-on-Sea | | Southend University Hospital | | United Kingdom | | Local investigator |
| Jagdish |  | Sokhi | Westcliff-on-Sea | | Southend University Hospital | | United Kingdom | | Local investigator |
| Katie-Anne |  | Baker | Bristol | | Southmead Hospital | | United Kingdom | | Local investigator |
| Wendy |  | Bertram | Bristol | | Southmead Hospital | | United Kingdom | | Local investigator |
| Alex |  | Looseley | Bristol | | Southmead Hospital | | United Kingdom | | Local co-ordinator |
| Ronelle |  | Mouton | Bristol | | Southmead Hospital | | United Kingdom | | Local investigator |
| Glenn |  | Arnold | London | | St Mary's Hospital, London | | United Kingdom | | Local investigator |
| Shobhit |  | Arya | London | | St Mary's Hospital, London | | United Kingdom | | Local investigator |
| Danai |  | Balfoussia | London | | St Mary's Hospital, London | | United Kingdom | | Local investigator |
| Linden |  | Baxter | London | | St Mary's Hospital, London | | United Kingdom | | Local investigator |
| James |  | Harris | London | | St Mary's Hospital, London | | United Kingdom | | Local investigator |
| Craig |  | Jones | London | | St Mary's Hospital, London | | United Kingdom | | Local investigator |
| Alison |  | Knaggs | London | | St Mary's Hospital, London | | United Kingdom | | Local investigator |
| Sheraz |  | Markar | London | | St Mary's Hospital, London | | United Kingdom | | Local investigator |
| Anisha |  | Perera | London | | St Mary's Hospital, London | | United Kingdom | | Local investigator |
| Alasdair |  | Scott | London | | St Mary's Hospital, London | | United Kingdom | | Local co-ordinator |
| Asako |  | Shida | London | | St Mary's Hospital, London | | United Kingdom | | Local investigator |
| Ravneet |  | Sirha | London | | St Mary's Hospital, London | | United Kingdom | | Local investigator |
| Sally |  | Wright | London | | St Mary's Hospital, London | | United Kingdom | | Local investigator |
| Victoria |  | Frost | Chertsey | | St Peter's Hospital | | United Kingdom | | Local investigator |
| Catherine |  | Gray | Chertsey | | St Peter's Hospital | | United Kingdom | | Local investigator |
| Mark |  | MacGregor | Chertsey | | St Peter's Hospital | | United Kingdom | | Local co-ordinator |
| Emma |  | Andrews | London | | St Thomas' Hospital | | United Kingdom | | Local investigator |
| Lindsay |  | Arrandale | London | | St Thomas' Hospital | | United Kingdom | | Local investigator |
| Stephen |  | Barrett | London | | St Thomas' Hospital | | United Kingdom | | Local investigator |
| Heena |  | Bidd | London | | St Thomas' Hospital | | United Kingdom | | Local co-ordinator |
| Elna |  | Cifra | London | | St Thomas' Hospital | | United Kingdom | | Local investigator |
| Mariese |  | Cooper | London | | St Thomas' Hospital | | United Kingdom | | Local investigator |
| Dragos |  | Dragnea | London | | St Thomas' Hospital | | United Kingdom | | Local investigator |
| Cifra |  | Elna | London | | St Thomas' Hospital | | United Kingdom | | Local investigator |
| Jennifer |  | Maclean | London | | St Thomas' Hospital | | United Kingdom | | Local investigator |
| Sonja |  | Meier | London | | St Thomas' Hospital | | United Kingdom | | Local investigator |
| Donald |  | Milliken | London | | St Thomas' Hospital | | United Kingdom | | Local investigator |
| Christopher |  | Munns | London | | St Thomas' Hospital | | United Kingdom | | Local investigator |
| Nadir |  | Ratanshi | London | | St Thomas' Hospital | | United Kingdom | | Local investigator |
| Abegail |  | Salvana | London | | St Thomas' Hospital | | United Kingdom | | Local investigator |
| Anthony |  | Watson | London | | St Thomas' Hospital | | United Kingdom | | Local investigator |
| Hani |  | Ali | Sunderland | | Sunderland Royal Hospital | | United Kingdom | | Local investigator |
| Gill |  | Campbell | Sunderland | | Sunderland Royal Hospital | | United Kingdom | | Local investigator |
| Rebecca |  | Critchley | Sunderland | | Sunderland Royal Hospital | | United Kingdom | | Local co-ordinator |
| Catherine |  | Hicks | Sunderland | | Sunderland Royal Hospital | | United Kingdom | | Local investigator |
| Alison |  | Liddle | Sunderland | | Sunderland Royal Hospital | | United Kingdom | | Local investigator |
| Marc |  | Pass | Sunderland | | Sunderland Royal Hospital | | United Kingdom | | Local investigator |
| Charlotte |  | Ritchie | Sunderland | | Sunderland Royal Hospital | | United Kingdom | | Local investigator |
| Charlotte |  | Thomas | Sunderland | | Sunderland Royal Hospital | | United Kingdom | | Local investigator |
| Lingxi |  | Too | Sunderland | | Sunderland Royal Hospital | | United Kingdom | | Local co-ordinator |
| Sarah |  | Welsh | Sunderland | | Sunderland Royal Hospital | | United Kingdom | | Local investigator |
| Talvinder |  | Gill | Manchester | | Royal Oldham Hospital | | United Kingdom | | Local co-ordinator |
| Joanne |  | Johnson | Manchester | | Royal Oldham Hospital | | United Kingdom | | Local investigator |
| Joanne |  | Reed | Manchester | | Royal Oldham Hospital | | United Kingdom | | Local investigator |
| Edward |  | Davis | Birmingham | | Royal Orthopaedic Hospital | | United Kingdom | | Local co-ordinator |
| Sam |  | Papadopoullos | Birmingham | | Royal Orthopaedic Hospital | | United Kingdom | | Local investigator |
| Clare |  | Attwood | Torquay | | Torbay Hospital | | United Kingdom | | Local investigator |
| Andrew |  | Biffen | Torquay | | Torbay Hospital | | United Kingdom | | Local co-ordinator |
| Kerenza |  | Boulton | Torquay | | Torbay Hospital | | United Kingdom | | Local investigator |
| Sophie |  | Gray | Torquay | | Torbay Hospital | | United Kingdom | | Local investigator |
| David |  | Hay | Torquay | | Torbay Hospital | | United Kingdom | | Local investigator |
| Sarah |  | Mills | Torquay | | Torbay Hospital | | United Kingdom | | Local investigator |
| Jane |  | Montgomery | Torquay | | Torbay Hospital | | United Kingdom | | Local co-ordinator |
| Rory |  | Riddell | Torquay | | Torbay Hospital | | United Kingdom | | Local investigator |
| James |  | Simpson | Torquay | | Torbay Hospital | | United Kingdom | | Local investigator |
| Neeraj |  | Bhardwaj | Manchester | | Trafford Hospitals | | United Kingdom | | Local investigator |
| Elaine |  | Paul | Manchester | | Trafford Hospitals | | United Kingdom | | Local investigator |
| Nosakhare |  | Uwubamwen | Manchester | | Trafford Hospitals | | United Kingdom | | Local investigator |
| Akbar |  | Vohra | Manchester | | Trafford Hospitals | | United Kingdom | | Local co-ordinator |
| Emer |  | Berntsen | Tunbridge Wells | | Tunbridge Wells Hospital | | United Kingdom | | Local investigator |
| Tracey |  | Nolan | Tunbridge Wells | | Tunbridge Wells Hospital | | United Kingdom | | Local co-ordinator |
| Angus |  | Turner | Tunbridge Wells | | Tunbridge Wells Hospital | | United Kingdom | | Local investigator |
| Maini |  | Alexander | London | | University College London | | United Kingdom | | Local investigator |
| James |  | Arrich | London | | University College London | | United Kingdom | | Local investigator |
| Swarna |  | Arumugam | London | | University College London | | United Kingdom | | Local investigator |
| Douglas |  | Blackwood | London | | University College London | | United Kingdom | | Local investigator |
| Victoria |  | Boggiano | London | | University College London | | United Kingdom | | Local investigator |
| Robyn |  | Brown | London | | University College London | | United Kingdom | | Local investigator |
| Yik |  | Lam Chan | London | | University College London | | United Kingdom | | Local investigator |
| Devnandan |  | Chatterjee | London | | University College London | | United Kingdom | | Local investigator |
| Ashok |  | Chhabra | London | | University College London | | United Kingdom | | Local investigator |
| Rachel |  | Christian | London | | University College London | | United Kingdom | | Local investigator |
| Hannah |  | Costelloe | London | | University College London | | United Kingdom | | Local investigator |
| Madeline |  | Coxwell Matthewman | London | | University College London | | United Kingdom | | Local investigator |
| Emma |  | Dalton | London | | University College London | | United Kingdom | | Local investigator |
| Julia |  | Darko | London | | University College London | | United Kingdom | | Local investigator |
| Maria |  | Davari | London | | University College London | | United Kingdom | | Local investigator |
| Tejal |  | Dave | London | | University College London | | United Kingdom | | Local investigator |
| Matthew |  | Deacon | London | | University College London | | United Kingdom | | Local investigator |
| Shantal |  | Deepak | London | | University College London | | United Kingdom | | Local investigator |
| Holly |  | Edmond | London | | University College London | | United Kingdom | | Local investigator |
| Jessica |  | Ellis | London | | University College London | | United Kingdom | | Local investigator |
| Ahmed |  | El-Sayed | London | | University College London | | United Kingdom | | Local investigator |
| Philip |  | Eneje | London | | University College London | | United Kingdom | | Local investigator |
| Rose |  | English | London | | University College London | | United Kingdom | | Local investigator |
| Renee |  | Ewe | London | | University College London | | United Kingdom | | Local investigator |
| William |  | Foers | London | | University College London | | United Kingdom | | Local investigator |
| John |  | Franklin | London | | University College London | | United Kingdom | | Local investigator |
| Laura |  | Gallego | London | | University College London | | United Kingdom | | Local investigator |
| Emily |  | Garrett | London | | University College London | | United Kingdom | | Local investigator |
| Olivia |  | Goldberg | London | | University College London | | United Kingdom | | Local investigator |
| Harry |  | Goss | London | | University College London | | United Kingdom | | Local investigator |
| Rosanna |  | Greaves | London | | University College London | | United Kingdom | | Local investigator |
| Rudy |  | Harris | London | | University College London | | United Kingdom | | Local investigator |
| Charles |  | Hennings | London | | University College London | | United Kingdom | | Local investigator |
| Eleanor |  | Jones | London | | University College London | | United Kingdom | | Local investigator |
| Nelson |  | Kamali | London | | University College London | | United Kingdom | | Local investigator |
| Naomi |  | Kokkinos | London | | University College London | | United Kingdom | | Local investigator |
| Carys |  | Lewis | London | | University College London | | United Kingdom | | Local investigator |
| Leda |  | Lignos | London | | University College London | | United Kingdom | | Local investigator |
| Evaleen | Victoria | Malgapo | London | | University College London | | United Kingdom | | Local investigator |
| Rizwana |  | Malik | London | | University College London | | United Kingdom | | Local investigator |
| Andrew |  | Milne | London | | University College London | | United Kingdom | | Local investigator |
| John-Patrick |  | Mulligan | London | | University College London | | United Kingdom | | Local investigator |
| Philippa |  | Nicklin | London | | University College London | | United Kingdom | | Local investigator |
| Natasha |  | Palipane | London | | University College London | | United Kingdom | | Local investigator |
| Thomas |  | Parsons | London | | University College London | | United Kingdom | | Local investigator |
| Rebecca |  | Piper | London | | University College London | | United Kingdom | | Local investigator |
| Rohan |  | Prakash | London | | University College London | | United Kingdom | | Local investigator |
| Byron |  | Ramesh | London | | University College London | | United Kingdom | | Local investigator |
| Sarah |  | Rasip | London | | University College London | | United Kingdom | | Local investigator |
| Jacob |  | Reading | London | | University College London | | United Kingdom | | Local investigator |
| Mariam |  | Rela | London | | University College London | | United Kingdom | | Local investigator |
| Anna |  | Reyes | London | | University College London | | United Kingdom | | Local investigator |
| Stephens |  | Robert | London | | University College London | | United Kingdom | | Local co-ordinator |
| Martin |  | Rooms | London | | University College London | | United Kingdom | | Local investigator |
| Karishma |  | Shah | London | | University College London | | United Kingdom | | Local investigator |
| Henry |  | Simons | London | | University College London | | United Kingdom | | Local investigator |
| Shalil |  | Solanki | London | | University College London | | United Kingdom | | Local investigator |
| Emma |  | Spowart | London | | University College London | | United Kingdom | | Local investigator |
| Amy |  | Stevens | London | | University College London | | United Kingdom | | Local investigator |
| Christopher |  | Thomas | London | | University College London | | United Kingdom | | Local investigator |
| Helena |  | Waggett | London | | University College London | | United Kingdom | | Local investigator |
| Arrash |  | Yassaee | London | | University College London | | United Kingdom | | Local investigator |
| Anthony |  | Kennedy | Durham | | University Hospital of North Durham | | United Kingdom | | Local investigator |
| Sara |  | Scott | Durham | | University Hospital of North Durham | | United Kingdom | | Local investigator |
| Sameer |  | Somanath | Durham | | University Hospital of North Durham | | United Kingdom | | Local co-ordinator |
| Andrew |  | Berg | Stockton-on-Tees | | University Hospital of North Tees | | United Kingdom | | Local investigator |
| Miguel |  | Hernandez | Stockton-on-Tees | | University Hospital of North Tees | | United Kingdom | | Local investigator |
| Rajesh |  | Nanda | Stockton-on-Tees | | University Hospital of North Tees | | United Kingdom | | Local co-ordinator |
| Ghanshyambhai |  | Tank | Stockton-on-Tees | | University Hospital of North Tees | | United Kingdom | | Local investigator |
| Natalie |  | Wilson | Stockton-on-Tees | | University Hospital of North Tees | | United Kingdom | | Local investigator |
| Debbie |  | Wilson | Stockton-on-Tees | | University Hospital of North Tees | | United Kingdom | | Local investigator |
| Yassr |  | Al-Soudaine | Cardiff | | University Hospital of Wales | | United Kingdom | | Local investigator |
| Matthew |  | Baldwin | Cardiff | | University Hospital of Wales | | United Kingdom | | Local investigator |
| Julie |  | Cornish | Cardiff | | University Hospital of Wales | | United Kingdom | | Local investigator |
| Zoe |  | Davies | Cardiff | | University Hospital of Wales | | United Kingdom | | Local investigator |
| Leigh |  | Davies | Cardiff | | University Hospital of Wales | | United Kingdom | | Local co-ordinator |
| Marc |  | Edwards | Cardiff | | University Hospital of Wales | | United Kingdom | | Local investigator |
| Natasha |  | Frewer | Cardiff | | University Hospital of Wales | | United Kingdom | | Local investigator |
| Sian |  | Gallard | Cardiff | | University Hospital of Wales | | United Kingdom | | Local investigator |
| James |  | Glasbey | Cardiff | | University Hospital of Wales | | United Kingdom | | Local investigator |
| Rhiannon |  | Harries | Cardiff | | University Hospital of Wales | | United Kingdom | | Local investigator |
| Luke |  | Hopkins | Cardiff | | University Hospital of Wales | | United Kingdom | | Local investigator |
| Taeyang |  | Kim | Cardiff | | University Hospital of Wales | | United Kingdom | | Local investigator |
| Vilavan |  | Koompirochana | Cardiff | | University Hospital of Wales | | United Kingdom | | Local investigator |
| Simon |  | Lawson | Cardiff | | University Hospital of Wales | | United Kingdom | | Local investigator |
| Megan |  | Lewis | Cardiff | | University Hospital of Wales | | United Kingdom | | Local investigator |
| Zaid |  | Makzal | Cardiff | | University Hospital of Wales | | United Kingdom | | Local investigator |
| Sarah |  | Scourfield | Cardiff | | University Hospital of Wales | | United Kingdom | | Local investigator |
| Yousra |  | Ahmad | Southampton | | University Hospital Southampton | | United Kingdom | | Local investigator |
| Sarah |  | Bates | Southampton | | University Hospital Southampton | | United Kingdom | | Local investigator |
| Clare |  | Blackwell | Southampton | | University Hospital Southampton | | United Kingdom | | Local investigator |
| Helen |  | Bryant | Southampton | | University Hospital Southampton | | United Kingdom | | Local investigator |
| Suzanne |  | Coulter | Southampton | | University Hospital Southampton | | United Kingdom | | Local investigator |
| Ross |  | Cruickshank | Southampton | | University Hospital Southampton | | United Kingdom | | Local investigator |
| Sonya |  | Daniel | Southampton | | University Hospital Southampton | | United Kingdom | | Local investigator |
| Thomas |  | Daubeny | Southampton | | University Hospital Southampton | | United Kingdom | | Local investigator |
| Mark |  | Edwards | Southampton | | University Hospital Southampton | | United Kingdom | | Local co-ordinator |
| Kim |  | Golder | Southampton | | University Hospital Southampton | | United Kingdom | | Local investigator |
| Lesley |  | Hawkins | Southampton | | University Hospital Southampton | | United Kingdom | | Local investigator |
| Bryant |  | Helen | Southampton | | University Hospital Southampton | | United Kingdom | | Local investigator |
| Honor |  | Hinxman | Southampton | | University Hospital Southampton | | United Kingdom | | Local investigator |
| Denny |  | Levett | Southampton | | University Hospital Southampton | | United Kingdom | | Local investigator |
| Ben |  | Skinner | Southampton | | University Hospital Southampton | | United Kingdom | | Local investigator |
| Joseph |  | Walsgrove | Southampton | | University Hospital Southampton | | United Kingdom | | Local investigator |
| Mike |  | Bradburn | Ashington | | Wansbeck General Hospital | | United Kingdom | | Local co-ordinator |
| Jane |  | Dickson | Ashington | | Wansbeck General Hospital | | United Kingdom | | Local investigator |
| Kathryn |  | Constantin | Watford | | Watford General | | United Kingdom | | Local investigator |
| Markwell |  | Karen | Watford | | Watford General | | United Kingdom | | Local investigator |
| Peter |  | O'Brien | Watford | | Watford General | | United Kingdom | | Local co-ordinator |
| Lynn |  | O'Donohoe | Watford | | Watford General | | United Kingdom | | Local investigator |
| Hannah |  | Payne | Watford | | Watford General | | United Kingdom | | Local investigator |
| Saul |  | Sundayi | Watford | | Watford General | | United Kingdom | | Local investigator |
| Elaine |  | Walker | Watford | | Watford General | | United Kingdom | | Local investigator |
| Jenny |  | Brooke | Bury Saint Edmunds | | West Suffolk Hospital | | United Kingdom | | Local investigator |
| Jon |  | Cardy | Bury Saint Edmunds | | West Suffolk Hospital | | United Kingdom | | Local investigator |
| Sally |  | Humphreys | Bury Saint Edmunds | | West Suffolk Hospital | | United Kingdom | | Local investigator |
| Laura |  | Kessack | Bury Saint Edmunds | | West Suffolk Hospital | | United Kingdom | | Local investigator |
| Christiane |  | Kubitzek | Bury Saint Edmunds | | West Suffolk Hospital | | United Kingdom | | Local co-ordinator |
| Suhas |  | Kumar | Bury Saint Edmunds | | West Suffolk Hospital | | United Kingdom | | Local investigator |
| Donna |  | Cotterill | Weston-super-Mare | | Weston General Hospital | | United Kingdom | | Local investigator |
| Emil |  | Hodzovic | Weston-super-Mare | | Weston General Hospital | | United Kingdom | | Local investigator |
| Gurunath |  | Hosdurga | Weston-super-Mare | | Weston General Hospital | | United Kingdom | | Local co-ordinator |
| Edward |  | Miles | Weston-super-Mare | | Weston General Hospital | | United Kingdom | | Local co-ordinator |
| Glenn |  | Saunders | Weston-super-Mare | | Weston General Hospital | | United Kingdom | | Local investigator |
| Marta |  | Campbell | Leytonstone | | Whipps Cross University Hospital | | United Kingdom | | Local investigator |
| Peter |  | Chan | Leytonstone | | Whipps Cross University Hospital | | United Kingdom | | Local investigator |
| Kim |  | Jemmett | Leytonstone | | Whipps Cross University Hospital | | United Kingdom | | Local investigator |
| Ashok |  | Raj | Leytonstone | | Whipps Cross University Hospital | | United Kingdom | | Local co-ordinator |
| Aditi |  | Naik | London | | Whittington Hospital | | United Kingdom | | Local investigator |
| Rajarajan |  | Ramamoorthy | London | | Whittington Hospital | | United Kingdom | | Local co-ordinator |
| Nimesh |  | Shah | London | | Whittington Hospital | | United Kingdom | | Local investigator |
| Axel |  | Sylvan | London | | Whittington Hospital | | United Kingdom | | Local co-ordinator |
| Katharine |  | Blyth | Worcester | | Worcestershire Royal Hospital | | United Kingdom | | Local investigator |
| Andrew |  | Burtenshaw | Worcester | | Worcestershire Royal Hospital | | United Kingdom | | Local co-ordinator |
| David |  | Freeman | Worcester | | Worcestershire Royal Hospital | | United Kingdom | | Local investigator |
| Emily |  | Johnson | Worcester | | Worcestershire Royal Hospital | | United Kingdom | | Local investigator |
| Philip |  | Lo | Worcester | | Worcestershire Royal Hospital | | United Kingdom | | Local investigator |
| Terry |  | Martin | Worcester | | Worcestershire Royal Hospital | | United Kingdom | | Local investigator |
| Emma |  | Plunkett | Worcester | | Worcestershire Royal Hospital | | United Kingdom | | Local investigator |
| Julie |  | Wollaston | Worcester | | Worcestershire Royal Hospital | | United Kingdom | | Local co-ordinator |
| Joanna |  | Allison | Yeovil | | Yeovil District Hospital | | United Kingdom | | Local investigator |
| Christine |  | Carroll | Yeovil | | Yeovil District Hospital | | United Kingdom | | Local investigator |
| Nicholas |  | Craw | Yeovil | | Yeovil District Hospital | | United Kingdom | | Local co-ordinator |
| Sarah |  | Craw | Yeovil | | Yeovil District Hospital | | United Kingdom | | Local investigator |
| Tressy |  | Pitt -Kerby | Yeovil | | Yeovil District Hospital | | United Kingdom | | Local investigator |
| Rebecca |  | Rowland-Axe | Yeovil | | Yeovil District Hospital | | United Kingdom | | Local investigator |
| Katie |  | Spurdle | Yeovil | | Yeovil District Hospital | | United Kingdom | | Local investigator |
| Andrew |  | McDonald | York | | York Hospital | | United Kingdom | | Local investigator |
| Davies |  | Simon | York | | York Hospital | | United Kingdom | | Local co-ordinator |
| Vivek |  | Sinha | York | | York Hospital | | United Kingdom | | Local investigator |
| Thomas |  | Smith | York | | York Hospital | | United Kingdom | | Local investigator |
| Valerie |  | Banner-Goodspeed | Boston | | Beth Israel Deaconess Medical Centre | | United States of America | | Local co-ordinator |
| Myles |  | Boone | Boston | | Beth Israel Deaconess Medical Centre | | United States of America | | Local co-ordinator |
| Kathleen |  | Campbell | Boston | | Beth Israel Deaconess Medical Centre | | United States of America | | Local investigator |
| Fengxin |  | Lu | Boston | | Beth Israel Deaconess Medical Centre | | United States of America | | Local investigator |
| Joseph |  | Scannell | Boston | | Beth Israel Deaconess Medical Centre | | United States of America | | Local investigator |
| Julia |  | Sobol | New York | | Columbia University Medical Center | | United States of America | | Local co-ordinator |
| Naraida |  | Balajonda | Durham | | Duke University in Durham | | United States of America | | Local investigator |
| Karen |  | Clemmons | Durham | | Duke University in Durham | | United States of America | | Local investigator |
| Carlos |  | Conde | Durham | | Duke University in Durham | | United States of America | | Local investigator |
| Bonita |  | Funk | Durham | | Duke University in Durham | | United States of America | | Local investigator |
| Roger |  | Hall | Durham | | Duke University in Durham | | United States of America | | Local investigator |
| Thomas |  | Hopkins | Durham | | Duke University in Durham | | United States of America | | Local co-ordinator |
| Omowunmi |  | Olaleye | Durham | | Duke University in Durham | | United States of America | | Local investigator |
| Omer |  | Omer | Durham | | Duke University in Durham | | United States of America | | Local investigator |
| Michelle |  | Pender | Durham | | Duke University in Durham | | United States of America | | Local investigator |
| Angelo |  | Porto | Durham | | Duke University in Durham | | United States of America | | Local investigator |
| Alice |  | Stevens | Durham | | Duke University in Durham | | United States of America | | Local investigator |
| Peter |  | Waweru | Durham | | Duke University in Durham | | United States of America | | Local investigator |
| Erlinda |  | Yeh | Durham | | Duke University in Durham | | United States of America | | Local investigator |
| Daniella |  | Bodansky | New York | | Icahn School of Medicine at Mount Sinai | | United States of America | | Local investigator |
| Adam |  | Evans | New York | | Icahn School of Medicine at Mount Sinai | | United States of America | | Local co-ordinator |
| Steven |  | Kleopoulos | New York | | Icahn School of Medicine at Mount Sinai | | United States of America | | Local investigator |
| Robert |  | Maril | New York | | Icahn School of Medicine at Mount Sinai | | United States of America | | Local investigator |
| Edward |  | Mathney | New York | | Icahn School of Medicine at Mount Sinai | | United States of America | | Local co-ordinator |
| Angela |  | Sanchez | New York | | Icahn School of Medicine at Mount Sinai | | United States of America | | Local investigator |
| Elizabeth |  | Tinuoye | New York | | Icahn School of Medicine at Mount Sinai | | United States of America | | Local investigator |
| Brian |  | Bateman | Boston | | Massachusetts General Hospital | | United States of America | | Local co-ordinator |
| Kristen |  | Eng | Boston | | Massachusetts General Hospital | | United States of America | | Local investigator |
| Ning |  | Jiang | Boston | | Massachusetts General Hospital | | United States of America | | Local investigator |
| Karim |  | Ladha | Boston | | Massachusetts General Hospital | | United States of America | | Local co-ordinator |
| Joseph |  | Needleman | Boston | | Massachusetts General Hospital | | United States of America | | Local investigator |
| Lee-lynn |  | Chen | Mount Zion | | Mount Zion | | United States of America | | Local co-ordinator |
| Lee-lynn |  | Chen | San Francisco | | Parnassus/Moffit-Long Hospital | | United States of America | | Local co-ordinator |
| Rondall |  | Lane | San Francisco | | Parnassus/Moffit-Long Hospital | | United States of America | | Local investigator |
| David |  | Robinowitz | San Francisco | | Parnassus/Moffit-Long Hospital | | United States of America | | Local investigator |
| Neil |  | Ghushe | Chicago | | South Shore Hospital | | United States of America | | Local investigator |
| Mariam |  | Irshad | Chicago | | South Shore Hospital | | United States of America | | Local investigator |
| Samir |  | Patel | Chicago | | South Shore Hospital | | United States of America | | Local co-ordinator |
| Steven |  | Takemoto | San Francisco | | San Francisco Veterans Affairs Medical Center | | United States of America | | Local co-ordinator |
| Art |  | Wallace | San Francisco | | San Francisco Veterans Affairs Medical Center | | United States of America | | Local co-ordinator |
| Michael |  | Mazzeffi | Chicago | | The University of Maryland School of Medicine | | United States of America | | Local co-ordinator |
| Peter |  | Rock | Chicago | | The University of Maryland School of Medicine | | United States of America | | Local investigator |
| Karin |  | Wallace | Chicago | | The University of Maryland School of Medicine | | United States of America | | Local investigator |
| Xiaomao |  | Zhu | Chicago | | The University of Maryland School of Medicine | | United States of America | | Local investigator |
| Pandora |  | Chua | Philadelphia | | University of Pennsylvania | | United States of America | | Local investigator |
| Lee |  | Fleisher | Philadelphia | | University of Pennsylvania | | United States of America | | Local co-ordinator |
| Matthew |  | Mattera | Philadelphia | | University of Pennsylvania | | United States of America | | Local investigator |
| Rebecca |  | Sharar | Washington | | University of Washington Medical Center | | United States of America | | Local investigator |
| Stephan |  | Thilen | Washington | | University of Washington Medical Center | | United States of America | | Local co-ordinator |
| Miriam |  | Treggiari | Washington | | University of Washington Medical Center | | United States of America | | Local investigator |
| Angela |  | Morgan | Pittsburgh | | UPMC Presbyterian and Montefiore Hospitals | | United States of America | | Local investigator |
| Iwan |  | Sofjan | Pittsburgh | | UPMC Presbyterian and Montefiore Hospitals | | United States of America | | Local investigator |
| Kathirvel |  | Subramaniam | Pittsburgh | | UPMC Presbyterian and Montefiore Hospitals | | United States of America | | Local co-ordinator |
| Michael |  | Avidan | St. Louis | | Washington University in St Louis | | United States of America | | Local co-ordinator |
| Hannah |  | Maybrier | St. Louis | | Washington University in St Louis | | United States of America | | Local investigator |
| Maxwell |  | Muench | St. Louis | | Washington University in St Louis | | United States of America | | Local investigator |
| Troy |  | Wildes | St. Louis | | Washington University in St Louis | | United States of America | | Local investigator |
